# Supplementary material for: Global climate forcing driven by altered BVOC fluxes from 1990–2010 land cover change in maritime Southeast Asia
Source: Copernicus journal article supplement (doi:10.5194/acp-2018-365), 2018-05-03
Supplement: Supplementary file 1 [file acp-2018-365-supplement.zip]

Archive with 6 entries (6 files):
- dataset_Fig1abc.xlsx
- dataset_Fig1d.xlsx
- dataset_Fig2.xlsx
- dataset_Fig3.xlsx
- dataset_MSEA_BVOC_Emissions.xlsx
- Harper_BVOC_ACP_SI.pdf
