# Supplementary material for: Global climate forcing driven by altered BVOC fluxes from 1990–2010 land cover change in maritime Southeast Asia
Source: Copernicus journal article supplement (doi:10.5194/acp-2018-365), 2018-05-03
Supplement: Supplementary file 1 [file acp-2018-365-supplement.zip › dataset_Fig1d.xlsx]

## Sheet: README
	Changes (1990 to 2010) in annual global-mean ozone mixing ratios (ppbv) for 40 vertical levels.
	Changes are calculated as 2010land_base minus 1990land_base.
	This file contains data plotted in Figure 1, panel d.
	Units: ppbv

## Sheet: profile
Pressure (hPa)	O3 change (ppbv)
974	0.0859669
953	0.087252
929.5	0.0890245
903.5	0.0931201
875	0.0999401
842.5	0.106723
805	0.119597
762.5	0.138599
716	0.157914
667	0.174236
616.5	0.190777
565	0.203635
514	0.216234
465	0.226544
418.5	0.2381
375	0.253791
335	0.282548
299	0.319523
266.5	0.370881
237	0.442132
210	0.521333
185	0.585056
161.5	0.64465
139	0.673166
118	0.69321
99	0.687445
81.5	0.489877
65	0.0102035
50	-0.0386733
37	0.648022
25.5	0.47834
15	-0.0601952
7.81	-0.744206
4.39	-1.6697
2.47	0.434932
1.39	2.75733
0.781	2.41707
0.439	1.61289
0.247	1.16766
0.139	0
