# Supplementary material for: Global climate forcing driven by altered BVOC fluxes from 1990–2010 land cover change in maritime Southeast Asia
Source: Copernicus journal article supplement (doi:10.5194/acp-2018-365), 2018-05-03
Supplement: Supplementary file 1 [file acp-2018-365-supplement.zip › dataset_Fig2.xlsx]

## Sheet: README
	Changes (1990 to 2010) in annual zonal-mean mixing ratios (ppbv) of seven atmospheric species for 27 vertical levels and 90 latitude bands.
	Changes are calculated as 2010land_base minus 1990land_base.
	This file contains the data plotted in Figure 2.
	The data are given for 27 vertical levels (rows) x 90 latitude bands (columns).
	In each tab, the top row indicates the latitude (degrees N) and the first column indicates the vertical level (hPa).
	missing value = -999
	Each tab contains the data for the indicated species.
	Species: isoprene, ozone, formaldehyde, CO, alkyl nitrates, NOX, HOX
	Units: ppbv

## Sheet: isoprene
hPa \ degN	-89	-87	-85	-83	-81	-79	-77	-75	-73	-71	-69	-67	-65	-63	-61	-59	-57	-55	-53	-51	-49	-47	-45	-43	-41	-39	-37	-35	-33	-31	-29	-27	-25	-23	-21	-19	-17	-15	-13	-11	-9	-7	-5	-3	-1	1	3	5	7
974	-999	-999	-999	-999	-3.63943e-07	-3.02796e-07	9.16771e-10	1.28603e-07	-8.3659e-08	-1.10726e-07	-9.65229e-08	-3.54652e-07	-2.7856e-07	-3.22798e-07	-3.66439e-07	1.70367e-06	2.94903e-06	-4.76971e-06	-8.61345e-06	-1.1857e-05	-8.68936e-06	-6.12787e-06	-1.52856e-05	3.88548e-06	1.52318e-06	2.76035e-05	5.41685e-05	8.69874e-05	0.000394065	4.30644e-06	-0.000587448	-0.000637941	-0.000422403	8.70973e-05	-0.000354439	-0.000594728	-0.00102115	-0.000606366	0.000156723	0.000682727	0.00481284	0.00572652	0.00777155	0.115828	0.0877333	0.0872267	0.0540987	0.0770345	0.0133704
953	-999	-999	-999	-3.04077e-07	-3.11935e-07	-1.76427e-07	-1.10231e-08	7.22066e-08	8.01811e-08	1.66583e-07	1.93766e-07	2.5022e-07	3.03509e-07	5.65837e-07	6.94912e-07	2.07222e-06	6.25866e-06	-6.21891e-07	-1.07058e-05	-9.07539e-06	-8.91811e-06	-2.03541e-06	2.15704e-05	-7.7025e-06	-4.15836e-07	-4.17084e-05	3.675e-05	8.69436e-05	0.000345934	0.000700906	-0.000276335	-0.000603214	-0.000272229	0.000115544	-0.000574172	-0.00137722	-0.00109696	0.0010781	9.20892e-06	-0.00315392	-0.0011068	-0.000819087	0.00653303	0.0853953	0.0620856	0.0811172	0.0720627	0.0923629	0.0109311
929.5	-999	-999	-2.00118e-07	-1.10129e-07	3.46918e-08	-1.67347e-09	-2.37997e-08	-1.18453e-08	-6.85395e-09	2.60188e-08	1.11941e-07	1.12486e-07	2.25744e-07	3.44953e-07	9.01156e-07	3.94325e-06	7.36478e-06	-3.6764e-06	-8.43848e-06	-3.96743e-06	-7.50821e-06	7.90507e-06	4.61121e-06	-1.20974e-05	-2.39583e-06	-3.24342e-05	2.00281e-05	7.72476e-05	0.000343286	0.000587419	-0.000141367	-3.03984e-05	-0.000337988	-0.000310794	-0.00087139	-0.00136134	-0.000656515	0.000354946	-0.00184691	-0.00353527	-9.78708e-05	0.000217676	0.00462455	0.0589456	0.0534992	0.0555352	0.0817848	0.0641444	0.00733584
903.5	-999	-999	-1.11875e-07	-1.97149e-07	-1.40615e-07	-6.61676e-08	-3.5041e-08	-2.38142e-08	-5.13683e-09	-3.11848e-08	7.19665e-08	5.72218e-08	1.80793e-07	2.77709e-07	1.04494e-06	2.90229e-06	5.46331e-06	-3.85626e-06	-6.07327e-06	-4.54253e-06	-6.00389e-06	-1.15391e-06	5.23869e-07	-9.4804e-06	-4.96511e-06	-2.35378e-05	1.9779e-05	7.74646e-05	0.000316732	0.000464261	-0.000173911	-0.000181198	-0.000135571	0.000624463	-0.000853792	-0.00143427	-0.000738978	-0.000153631	-0.00233123	-0.00273561	-0.00168711	-0.00140876	0.002855	0.0330158	0.0313243	0.0380812	0.0564952	0.0355927	0.0039649
875	-999	-999	-2.15747e-07	-1.28013e-07	-1.42594e-07	-9.88366e-08	-6.08707e-08	-3.08501e-08	-1.6742e-08	-1.44282e-08	5.47188e-08	5.79093e-08	2.64678e-07	8.00937e-08	1.7276e-07	1.16773e-06	1.64614e-06	-8.93208e-06	-4.50166e-06	-1.05437e-06	-4.98228e-06	-5.55511e-06	-8.65082e-06	-6.23311e-06	-4.33857e-06	6.61984e-06	3.49996e-05	7.9859e-05	0.000283264	0.000378396	-0.000255261	-0.000301898	-3.01674e-05	0.000534162	-0.000699431	-0.00079675	-0.000528783	-0.000692189	-0.000826567	-0.00246626	-0.00248903	-0.000258505	0.00253627	0.0154469	0.0161097	0.0204943	0.0332768	0.0189538	0.00194719
842.5	-999	-999	-2.65805e-07	-1.02358e-07	-1.0278e-07	-8.98799e-08	-6.23768e-08	-4.31901e-08	-1.52577e-08	-3.51429e-09	3.55867e-08	6.20639e-09	6.87651e-08	-2.51894e-08	1.95469e-07	6.54618e-07	1.46116e-06	-2.95817e-06	-4.73607e-06	1.82574e-06	-2.10688e-06	-4.14217e-06	-9.94629e-06	-2.40002e-06	-4.7856e-06	8.08481e-06	3.10382e-05	5.78719e-05	0.000216078	0.000248151	-0.000145596	-0.000192966	-3.64259e-05	0.000259131	-0.000141725	-0.000286832	-0.000439301	-0.000613019	-0.000944555	-0.00193152	-0.00282875	-0.00124869	0.000942469	0.00622132	0.00578615	0.00898036	0.0158564	0.00827301	0.00114657
805	-999	-999	-5.5792e-08	-8.76025e-08	-6.14236e-08	-6.55855e-08	-5.22123e-08	-2.82816e-08	-2.34359e-08	1.10667e-08	2.45345e-08	-1.52941e-08	4.65661e-10	6.3028e-08	2.73641e-07	7.93814e-07	3.40951e-07	3.45288e-07	-3.61324e-06	6.30185e-07	-8.12579e-08	-3.31877e-06	-6.90948e-06	-2.94112e-06	4.26813e-06	-8.30274e-07	2.32444e-05	3.40561e-05	4.09726e-05	4.23528e-05	-0.000122182	-5.03287e-05	-0.000111144	0.000188336	1.51321e-05	-3.22983e-05	-0.000462994	-0.000472352	-0.000878885	-0.0010244	-0.00155698	-0.000509158	8.38041e-05	0.00275305	0.00231755	0.00347836	0.00733262	0.00493452	0.000616327
762.5	-999	-999	-2.11876e-08	-8.54052e-08	-8.24512e-08	-5.12955e-08	-4.44124e-08	-3.81478e-08	-1.30094e-08	3.39824e-08	3.70164e-08	2.32285e-08	5.62177e-08	2.48583e-08	2.4787e-07	6.69133e-07	-6.21367e-09	-2.14366e-06	-5.48316e-06	1.58412e-07	5.69416e-07	-5.23869e-08	-2.6112e-07	6.45057e-07	5.37396e-06	1.14762e-06	1.39887e-05	1.45035e-05	-3.27849e-06	-2.55648e-06	-2.36696e-05	1.66781e-05	2.85953e-05	0.000104718	0.000154547	8.48584e-05	-0.00019614	-0.000492401	-0.000666186	-0.00074394	-0.00106294	-0.000456594	1.28821e-05	0.00131658	0.00133125	0.00182032	0.00311416	0.00309211	0.000288758
716	-999	-2.33995e-08	-4.63915e-08	-6.83358e-08	-6.37956e-08	-4.51982e-08	-2.43454e-08	-3.74494e-08	-5.52609e-09	2.14204e-08	3.03662e-08	8.13816e-09	2.89674e-08	4.06781e-08	2.43399e-07	2.71124e-07	-5.82964e-07	-1.41635e-06	-6.8028e-07	3.99741e-08	-2.27905e-07	-6.5584e-07	4.95056e-07	6.03934e-07	-8.01578e-07	1.75938e-06	-3.82581e-06	1.05926e-06	-2.24682e-06	-8.39331e-06	-1.39491e-05	-6.10016e-08	4.10154e-06	-1.82204e-05	0.000231048	8.97218e-05	-6.59991e-05	-0.000128664	-0.000481248	-0.000348236	-0.000399467	-0.000322573	0.000124449	0.000748545	0.000785366	0.00089018	0.00130868	0.00152293	0.00010743
667	-2.72412e-08	-6.68806e-08	-9.4471e-08	-6.98783e-08	-8.04575e-08	-6.11981e-08	-5.86006e-08	-5.08007e-08	-1.65164e-08	-4.76575e-10	2.68483e-09	-9.11314e-10	5.16957e-09	3.98395e-08	1.79256e-07	1.25438e-07	4.38376e-08	-3.61433e-07	-2.81536e-07	-2.68199e-07	-1.90819e-07	-1.35129e-06	2.8481e-07	-3.46656e-07	2.9587e-07	1.22206e-06	-1.95895e-06	-1.08778e-06	-2.20159e-06	-1.32708e-05	-1.32546e-05	-3.18326e-06	2.8579e-05	-3.64953e-05	3.94434e-05	4.04073e-05	-3.19527e-05	4.82984e-06	-0.000133933	-0.000200113	-0.000180112	-0.00018747	5.39515e-06	0.000341592	0.000388286	0.000326606	0.000551932	0.000575976	2.67271e-05
616.5	7.21775e-09	-3.84753e-08	-8.83883e-08	-6.91507e-08	-3.71801e-08	-5.2969e-08	-2.75031e-08	-1.43773e-08	-1.24419e-08	-2.23372e-09	-9.45874e-10	-5.6516e-09	3.00406e-08	9.07148e-08	1.02509e-07	-4.83051e-08	-2.05913e-07	-4.83851e-09	-1.88935e-07	-2.29535e-07	1.48095e-07	3.92858e-07	-2.98896e-08	-2.06119e-06	7.85774e-07	3.88827e-07	-1.01209e-06	-1.41709e-06	-2.30281e-06	-8.58924e-06	-9.73046e-06	-7.66083e-06	1.36753e-05	-3.40128e-05	-9.87435e-06	3.5611e-05	-2.60361e-05	3.73246e-05	-7.66171e-05	-0.000207652	-0.000122273	-2.17073e-05	-2.77562e-05	0.000295924	0.00029527	0.000277848	0.000321541	0.000268633	2.63806e-05
565	-1.234e-08	-5.06116e-08	-5.51518e-08	-7.25704e-08	-8.20437e-08	-3.69764e-08	-1.95359e-08	-2.38433e-08	-2.02635e-08	-1.33732e-08	-1.11031e-08	-1.2642e-08	9.80817e-08	2.00675e-07	9.45838e-08	8.23784e-08	1.18933e-07	-1.21785e-07	4.67044e-07	1.64873e-07	3.97944e-07	1.49579e-06	-1.16749e-06	-1.52132e-06	1.61597e-06	2.91191e-07	-5.42423e-07	2.92406e-07	-3.18047e-07	-3.60591e-06	-4.73805e-06	6.82427e-06	-3.49828e-06	-2.94296e-05	2.0375e-05	3.28701e-05	2.38135e-05	4.11947e-05	-4.16916e-05	-0.000133446	-1.22958e-05	1.16881e-07	7.38353e-05	0.000297889	0.000379643	0.000411747	0.000344099	0.00026424	3.26731e-05
514	-3.0559e-08	-4.51982e-08	-5.15865e-08	-5.74364e-08	-5.78293e-08	-4.16039e-08	-3.04499e-08	-4.58531e-08	-5.1914e-08	-5.29471e-08	-5.58503e-08	-5.08971e-08	7.28214e-08	1.38456e-07	6.16801e-08	1.52497e-07	4.01873e-07	-1.60362e-08	1.03088e-06	1.41059e-07	6.0568e-07	3.12021e-06	1.35356e-06	1.78651e-06	2.5867e-06	3.00343e-06	-4.17785e-08	5.08968e-07	-9.03325e-07	-1.10193e-06	-2.8958e-06	2.15718e-06	3.35719e-06	-8.49459e-06	2.75401e-05	-2.5297e-06	3.04086e-05	4.9985e-05	-4.04194e-06	-4.62183e-05	-1.0673e-06	6.12577e-06	3.05721e-05	0.00023526	0.000311982	0.00032901	0.000288484	0.000257622	2.70882e-05
465	-9.48785e-09	-4.38304e-08	-6.2937e-08	-7.22648e-08	-8.30332e-08	-6.25514e-08	-5.63305e-08	-8.95016e-08	-1.0361e-07	-8.93669e-08	-9.35543e-08	-8.28149e-08	4.52765e-08	1.78557e-07	2.52585e-07	4.44568e-07	1.04172e-06	1.4343e-06	9.8451e-08	-5.60722e-07	4.48032e-07	1.95699e-06	1.78891e-06	5.02456e-06	3.36184e-06	4.20203e-06	5.49626e-08	2.78655e-07	-6.0114e-08	4.58502e-07	-2.62051e-06	-5.47268e-06	1.24e-05	-1.70305e-05	2.16343e-05	-2.2256e-05	1.90025e-05	3.97076e-05	-3.25497e-05	-9.59402e-06	4.48523e-05	-1.00427e-05	4.07877e-05	0.000166685	0.000198506	0.000220258	0.000215291	0.000159003	1.21852e-05
418.5	-1.28057e-09	-4.91855e-08	-7.37782e-08	-1.00074e-07	-1.07422e-07	-9.33796e-08	-9.65374e-08	-1.06418e-07	-9.44965e-08	-7.7529e-08	-8.64165e-08	-7.17664e-08	3.59469e-08	2.35088e-07	3.05035e-07	4.78802e-07	4.84804e-07	2.66264e-07	5.90269e-07	-4.95744e-07	-3.91155e-07	-2.20083e-07	-1.58501e-06	2.66943e-06	1.36048e-06	1.70403e-08	4.71642e-07	1.69812e-06	2.3318e-06	3.19196e-06	1.91454e-06	-1.56183e-05	-1.26235e-06	-3.15179e-05	2.36831e-05	-3.29076e-05	3.76254e-07	3.51435e-05	-8.55126e-05	2.98009e-05	6.79027e-05	-5.85439e-05	3.47537e-05	0.000226887	0.000302362	0.000209858	0.000242693	0.000189846	1.74452e-05
375	-2.73576e-09	-5.52973e-08	-8.79518e-08	-1.03173e-07	-1.06593e-07	-9.45511e-08	-8.81264e-08	-8.6613e-08	-6.57164e-08	-5.08444e-08	-8.36189e-08	-1.37505e-07	-7.7549e-08	1.9958e-08	-5.9943e-08	9.48239e-08	2.76304e-08	-3.15249e-07	-5.93103e-07	-1.73546e-07	-4.94107e-07	-1.03006e-06	-3.03349e-07	-1.20766e-07	8.63714e-07	-5.92583e-07	-3.3628e-07	3.43159e-06	3.57983e-06	6.37892e-06	5.632e-06	-2.69832e-05	1.29151e-05	-5.74207e-06	1.26113e-05	-3.19041e-05	2.63099e-05	2.83164e-05	-4.29736e-05	0.000111177	0.000185456	-6.90799e-05	6.04102e-05	0.000442882	0.000539847	0.000489852	0.00044518	0.000304822	5.3864e-05
335	-7.39237e-09	-5.19794e-08	-6.92089e-08	-8.1578e-08	-8.92032e-08	-7.68778e-08	-6.39193e-08	-6.14673e-08	-3.90937e-08	-2.61862e-08	-4.86034e-08	-8.96689e-08	-6.33081e-08	-1.02827e-08	1.98452e-09	4.19823e-08	3.4259e-07	-3.31864e-07	-7.8087e-07	-6.15888e-07	-1.24084e-06	-1.81236e-06	2.36638e-06	1.38757e-06	1.40021e-06	2.31765e-06	2.00559e-06	3.9419e-06	3.44843e-06	5.71634e-06	1.3702e-05	-6.82392e-06	1.23897e-05	3.54452e-05	1.99655e-05	-4.83925e-05	3.19947e-05	5.49387e-05	-0.000105706	1.61137e-05	5.01191e-05	-4.30681e-05	8.63746e-05	0.000845288	0.000839211	0.00100514	0.000938823	0.000652283	0.000108011
299	-1.61235e-08	-4.60714e-08	-7.26141e-08	-8.44593e-08	-8.4241e-08	-7.30652e-08	-6.77319e-08	-5.47589e-08	-3.89482e-08	-3.19851e-08	-3.85953e-08	-5.55156e-08	-4.71482e-08	-2.54768e-08	3.09228e-10	5.97265e-08	1.78521e-07	6.58638e-08	-1.52106e-07	-4.97414e-07	-3.95736e-07	-1.72288e-06	1.37712e-06	2.26702e-06	6.34594e-07	7.60076e-07	2.29487e-06	5.04515e-06	3.72712e-06	3.76563e-06	5.37949e-06	-1.72647e-05	-1.69189e-05	2.81027e-05	-9.75025e-06	-7.82162e-05	-1.49258e-05	0.000105206	-0.000251579	-0.000362677	2.95676e-05	-6.64163e-05	0.000166263	0.00124535	0.00110013	0.00116377	0.00146789	0.00136808	0.000127002
266.5	-2.5495e-08	-4.78467e-08	-8.87376e-08	-9.18662e-08	-9.50677e-08	-8.10542e-08	-7.583e-08	-5.47298e-08	-4.93092e-08	-4.12037e-08	-4.87344e-08	-6.58365e-08	-3.91119e-08	1.50903e-08	9.08876e-08	1.15993e-07	1.69421e-07	1.89581e-07	3.86681e-08	3.30438e-08	1.74987e-07	-1.97985e-06	-1.64375e-07	4.09087e-07	1.62883e-06	1.47491e-06	3.83399e-06	3.92844e-06	-1.35048e-06	-5.48741e-06	-6.90389e-06	-1.5741e-05	-3.17371e-06	2.01361e-05	-4.30201e-05	-3.82452e-05	3.84641e-05	6.55139e-05	-0.000331249	-0.000604222	-5.00865e-06	-0.000184849	0.000143569	0.00155277	0.00117638	0.00118927	0.0019445	0.0018247	0.000134754
237	-4.22588e-08	-7.33999e-08	-8.62055e-08	-8.82719e-08	-8.6744e-08	-7.90897e-08	-7.51461e-08	-6.17292e-08	-5.08662e-08	-4.13565e-08	-4.0025e-08	-3.19342e-08	-1.18634e-08	1.16415e-09	-9.3969e-09	2.04673e-08	8.18181e-08	6.78301e-08	-1.10769e-07	-2.55088e-07	-3.56726e-07	-6.37032e-07	3.64435e-07	5.24677e-07	7.59959e-07	5.78439e-09	2.49794e-06	1.8518e-06	-3.72052e-06	-7.37386e-06	-3.86732e-07	-7.9117e-06	-5.64149e-06	1.72383e-05	-3.02955e-05	-2.13333e-05	1.48239e-05	-7.01286e-06	-0.000360608	-0.000424769	3.02494e-06	-4.09782e-08	0.000248045	0.00212843	0.00161579	0.00136843	0.00191777	0.00204616	0.000337921
210	-3.6438e-08	-7.74744e-08	-9.26957e-08	-8.56526e-08	-7.80274e-08	-7.23812e-08	-7.14208e-08	-6.00412e-08	-4.82105e-08	-3.41752e-08	-2.7736e-08	-7.29779e-09	4.10364e-09	8.9276e-09	9.91349e-09	1.32786e-08	1.56651e-08	4.08909e-09	-1.75314e-08	2.40652e-08	1.4119e-07	1.54028e-07	1.15e-07	-2.35097e-07	-8.63358e-07	-1.80976e-06	-5.57855e-07	2.73007e-06	4.5739e-06	-2.46466e-06	1.4264e-05	1.17524e-05	1.79291e-05	-1.90036e-05	-5.40945e-05	-3.9977e-05	-6.04726e-05	-6.53304e-05	-0.00016693	-0.000326272	-0.000141557	-0.000116393	0.000274118	0.00246273	0.00186031	0.00190818	0.00240151	0.00291508	0.000394356
185	-1.90921e-08	-3.00352e-08	-4.38013e-08	-4.70609e-08	-4.53438e-08	-4.67262e-08	-2.71539e-08	-1.97906e-08	-1.65746e-08	-9.07312e-09	-3.12866e-10	1.62981e-08	2.84854e-08	3.20579e-08	2.69865e-08	2.20716e-08	1.7666e-08	1.30276e-08	8.68749e-09	1.24237e-08	4.66607e-08	7.02821e-08	7.0977e-09	-1.31571e-07	-2.98307e-07	-2.73529e-07	4.37147e-07	4.20693e-06	7.44517e-06	-4.9363e-06	-1.63774e-05	-2.74684e-05	2.24058e-05	4.04334e-06	-3.89125e-05	-1.95839e-05	-5.09992e-05	-0.000210855	-0.000139916	-0.000874892	-0.000481229	-0.000389598	0.000165708	0.00200033	0.00204882	0.00288329	0.00320567	0.00392548	0.000701241
161.5	-1.49012e-08	3.14903e-08	2.31084e-08	2.11585e-08	3.82424e-08	2.9424e-08	3.13739e-08	1.58616e-09	1.8772e-09	3.70346e-09	1.65674e-08	2.94822e-08	3.72384e-08	3.43571e-08	2.83762e-08	2.15514e-08	1.65564e-08	1.44282e-08	8.65839e-09	1.22964e-09	6.03541e-09	-5.21322e-09	-1.66219e-08	5.4908e-08	1.28322e-07	2.41711e-07	7.02545e-07	2.33301e-06	3.14831e-07	-7.04448e-06	-1.76928e-06	3.09888e-05	1.607e-05	4.70865e-05	-3.16065e-05	-5.53424e-05	9.15639e-05	-6.23437e-05	-0.000443883	-0.000872012	-0.000703432	-0.000632934	-0.000201806	0.00203128	0.0025766	0.0033544	0.00361539	0.00432593	0.00075064
139	-7.40401e-08	-4.57512e-08	-2.06928e-08	2.44763e-08	-1.94996e-09	-1.84518e-08	-2.24391e-08	-2.15659e-08	-5.20959e-09	1.40935e-08	2.21189e-08	3.19924e-08	3.69328e-08	3.17959e-08	3.21816e-08	3.12903e-08	2.67246e-08	2.88492e-08	2.69902e-08	1.89939e-08	1.81644e-08	1.20526e-08	1.48357e-08	2.91293e-08	7.41602e-08	2.6009e-07	5.37966e-07	1.73718e-06	-2.53405e-06	-1.05388e-05	3.48155e-06	1.92045e-05	-1.11342e-05	0.000116765	-3.43451e-05	6.0098e-05	0.000285944	5.07385e-06	-0.000757067	-0.000461016	0.000540096	0.000584707	0.000895228	0.00311716	0.00340611	0.00437789	0.00435937	0.00533861	0.000628023
118	-6.20494e-08	6.28643e-09	-5.06407e-09	1.43482e-08	-8.22183e-09	-4.45725e-08	-4.27244e-08	-3.20724e-08	-1.84591e-08	-2.83762e-10	1.42027e-08	2.75468e-08	4.15821e-08	3.07555e-08	2.69974e-08	2.53349e-08	2.84381e-08	3.36768e-08	3.17559e-08	2.93403e-08	2.52185e-08	1.87974e-08	1.79134e-08	2.14059e-08	-3.98722e-09	1.16128e-07	4.21085e-07	2.87317e-06	3.9376e-06	-1.84237e-06	-6.49726e-06	-1.79862e-08	4.73101e-05	8.72557e-05	-3.16537e-05	8.02615e-05	0.000137937	-0.000303304	-0.000474378	-0.000592284	0.000526052	0.000709843	0.000445168	0.00187298	0.00324881	0.0031627	0.00257432	0.00325661	0.000189189
99	-6.91507e-08	-8.26549e-09	6.14091e-09	-3.53903e-08	-7.54371e-08	-1.14465e-07	-1.02649e-07	-8.08359e-08	-6.75063e-08	-4.58458e-08	-1.84009e-08	-9.48785e-09	3.29019e-08	3.87226e-08	4.48199e-08	2.48874e-08	1.43773e-08	1.83027e-08	2.25446e-08	2.75431e-08	3.12939e-08	2.79288e-08	2.65863e-08	2.72739e-08	3.07809e-08	5.02769e-08	-1.37039e-07	1.24055e-07	4.70878e-07	2.04561e-06	3.87136e-06	4.84105e-05	0.000104294	4.47985e-05	-2.25696e-05	8.13408e-06	-2.32173e-06	-0.000102066	-0.000228315	-0.000219407	0.000436172	-0.000135221	-0.000603687	-0.000648662	1.42232e-05	0.000292504	0.000619721	0.000857112	3.59099e-05
81.5	-1.49594e-07	-1.33878e-08	-4.14439e-08	-8.05885e-08	-8.92614e-08	-1.08674e-07	-3.70346e-08	1.218e-08	2.57278e-08	1.83863e-08	4.71773e-08	3.47936e-08	5.99975e-08	5.60467e-08	3.48664e-08	2.12385e-08	1.52068e-09	3.82352e-09	9.12041e-09	1.53232e-08	1.61745e-08	1.77861e-08	1.58761e-08	1.96997e-08	2.33958e-08	1.78734e-08	1.2802e-08	1.71167e-08	1.72447e-07	5.44402e-07	1.01401e-06	2.6728e-06	-3.25235e-06	2.70288e-05	1.02923e-05	1.5507e-06	-1.11355e-06	-2.25715e-06	1.68714e-05	-3.93956e-05	-3.45969e-05	-0.000150023	-0.000133523	-0.000280863	-0.00025396	-7.42278e-05	0.000104547	8.32012e-05	4.76504e-05
[truncated: 41 more columns]

## Sheet: ozone
hPa \ degN	-89	-87	-85	-83	-81	-79	-77	-75	-73	-71	-69	-67	-65	-63	-61	-59	-57	-55	-53	-51	-49	-47	-45	-43	-41	-39	-37	-35	-33	-31	-29	-27	-25	-23	-21	-19	-17	-15	-13	-11	-9	-7	-5	-3	-1	1	3	5	7
974	-999	-999	-999	-999	0.0548668	0.0572586	0.0836544	0.0812626	0.0793056	0.0823803	0.079071	0.0812569	0.0798531	0.080904	0.0788574	0.054163	0.0744781	0.076046	0.0809803	0.0845509	0.0854969	0.0891438	0.0926323	0.094471	0.0975056	0.102821	0.106773	0.109819	0.109051	0.115173	0.121401	0.125185	0.130939	0.141169	0.150421	0.16304	0.171217	0.180582	0.191887	0.200666	0.20546	0.193239	0.152155	0.0610065	0.0852299	0.0792713	0.0810127	0.114836	0.118277
953	-999	-999	-999	0.0829201	0.0843315	0.0851841	0.0837326	0.0896282	0.0846882	0.0800114	0.0813313	0.0809784	0.0846539	0.0852642	0.0836601	0.0825729	0.0833626	0.0850182	0.0887909	0.0917683	0.0929222	0.0989151	0.0992928	0.10137	0.102255	0.105862	0.110817	0.114143	0.115469	0.119358	0.123236	0.126972	0.133003	0.143101	0.149931	0.162283	0.171846	0.179026	0.187077	0.196941	0.203842	0.192213	0.151773	0.0638981	0.0764751	0.0558357	0.0537052	0.0925312	0.120825
929.5	-999	-999	0.0753288	0.0954208	0.093811	0.0914631	0.0901794	0.0918503	0.0860367	0.0874615	0.0873394	0.0878372	0.0878944	0.0869255	0.0874901	0.0888367	0.0919991	0.0929489	0.0946236	0.0961666	0.0980568	0.10191	0.102644	0.105545	0.105431	0.110483	0.113104	0.117657	0.119867	0.124012	0.126341	0.129187	0.137413	0.148357	0.154644	0.165016	0.178616	0.184568	0.191067	0.200611	0.20546	0.195663	0.159405	0.0743599	0.0740719	0.0538788	0.0398254	0.0931492	0.12414
903.5	-999	-999	0.0919647	0.0948753	0.0975227	0.096138	0.0914192	0.0914478	0.0888138	0.0915432	0.0905113	0.0894165	0.0885563	0.0874977	0.0884781	0.0915604	0.0937519	0.0952778	0.0969963	0.0995789	0.10099	0.103128	0.105227	0.110195	0.111336	0.113983	0.117208	0.121525	0.125132	0.129768	0.131134	0.135296	0.147038	0.155203	0.164753	0.174723	0.183161	0.189528	0.195717	0.206249	0.212523	0.19902	0.168568	0.0996132	0.0900421	0.0673466	0.0531559	0.103264	0.130713
875	-999	-999	0.0967255	0.0988693	0.0986214	0.0967503	0.092535	0.0941257	0.0902805	0.092886	0.0925159	0.0929012	0.0914135	0.0906353	0.0925579	0.09412	0.0970364	0.0996552	0.101414	0.103262	0.107317	0.110447	0.112486	0.115742	0.120033	0.1227	0.127197	0.132072	0.134201	0.134418	0.1422	0.148335	0.156315	0.168694	0.177879	0.185925	0.193155	0.202057	0.209688	0.218002	0.220495	0.213278	0.186089	0.129862	0.115715	0.0914688	0.078537	0.118464	0.140676
842.5	-999	-999	0.100971	0.100021	0.098938	0.0977612	0.0942287	0.0935955	0.0922394	0.0948486	0.0929413	0.0956097	0.0945644	0.0942574	0.0959072	0.0974045	0.0993862	0.102598	0.104219	0.106882	0.112053	0.116173	0.119595	0.121082	0.125252	0.129784	0.134422	0.140759	0.142593	0.140671	0.149128	0.15844	0.166912	0.178997	0.185249	0.196632	0.208975	0.215515	0.221306	0.226851	0.231512	0.230305	0.206186	0.163435	0.149147	0.125856	0.108252	0.13509	0.151606
805	-999	-999	0.101284	0.100304	0.0998802	0.0985527	0.0960732	0.0949993	0.0935001	0.0962887	0.0954151	0.0989132	0.0973358	0.0969467	0.0980644	0.10005	0.101954	0.105309	0.10853	0.113014	0.118839	0.124077	0.129745	0.133404	0.138596	0.143944	0.149052	0.157295	0.162994	0.16288	0.167686	0.178173	0.192024	0.203884	0.210896	0.225594	0.239601	0.245392	0.247593	0.253691	0.257229	0.258213	0.240454	0.204327	0.188597	0.171791	0.148571	0.160219	0.168739
762.5	-999	-999	0.102634	0.102123	0.101562	0.0997791	0.0993614	0.0963783	0.096447	0.0990143	0.100216	0.102831	0.101858	0.10187	0.102781	0.10565	0.109165	0.113262	0.118774	0.124107	0.131073	0.13686	0.143078	0.149544	0.155956	0.161976	0.16925	0.178059	0.185776	0.189587	0.19677	0.209545	0.22678	0.240932	0.251724	0.269363	0.285213	0.294453	0.293728	0.298706	0.301537	0.303112	0.289745	0.262493	0.243628	0.228333	0.204781	0.199793	0.200947
716	-999	0.101376	0.104553	0.103363	0.103317	0.10236	0.101	0.100853	0.100052	0.102962	0.105412	0.106865	0.105721	0.106098	0.108883	0.111767	0.117065	0.122398	0.128769	0.135788	0.142643	0.14912	0.155704	0.16264	0.169685	0.177166	0.186897	0.196659	0.203785	0.212006	0.225052	0.239326	0.256489	0.275791	0.290665	0.310719	0.329269	0.339607	0.341141	0.349712	0.355942	0.354527	0.339622	0.318302	0.302094	0.287132	0.261356	0.248692	0.24173
667	0.0948601	0.105625	0.107239	0.105637	0.103996	0.105324	0.103447	0.103767	0.104237	0.108906	0.110737	0.110256	0.109695	0.110874	0.114735	0.119652	0.124809	0.131351	0.138042	0.145187	0.152313	0.160679	0.168705	0.17635	0.183617	0.193134	0.204483	0.215199	0.223312	0.235649	0.250298	0.266811	0.283585	0.30669	0.326992	0.351357	0.371838	0.383762	0.385845	0.395084	0.402279	0.398655	0.380978	0.359848	0.351917	0.337696	0.309868	0.289116	0.282257
616.5	0.11108	0.108776	0.107018	0.108864	0.107395	0.108585	0.108166	0.109314	0.110783	0.114643	0.11573	0.115601	0.116325	0.11882	0.123379	0.129581	0.13509	0.142895	0.150089	0.157566	0.165073	0.174828	0.184505	0.192898	0.201733	0.212715	0.225056	0.237278	0.24855	0.26461	0.280037	0.297573	0.320522	0.346416	0.368984	0.391228	0.412022	0.426937	0.426891	0.429058	0.430389	0.429249	0.408848	0.387951	0.384666	0.374863	0.347221	0.322182	0.309853
565	0.114819	0.115292	0.115952	0.113808	0.111626	0.11356	0.113708	0.115532	0.118362	0.121689	0.122494	0.122021	0.123451	0.127678	0.133503	0.139038	0.146133	0.153671	0.161667	0.171146	0.180431	0.190586	0.201122	0.20924	0.219463	0.231926	0.244617	0.258057	0.273094	0.288742	0.306606	0.326256	0.351532	0.375973	0.402054	0.420322	0.435471	0.449432	0.448994	0.443615	0.441669	0.439255	0.421036	0.401184	0.393585	0.382786	0.364334	0.341423	0.326332
514	0.119411	0.121208	0.122543	0.120441	0.119301	0.120583	0.121681	0.124081	0.12735	0.130066	0.131268	0.131668	0.134678	0.140762	0.146015	0.15237	0.160419	0.167789	0.177353	0.188206	0.19836	0.208385	0.218235	0.226887	0.23687	0.249695	0.264168	0.279053	0.296219	0.312748	0.333599	0.35688	0.383106	0.40501	0.429806	0.442692	0.452698	0.464775	0.463127	0.453323	0.444111	0.438496	0.426552	0.406883	0.395363	0.384186	0.369926	0.347469	0.339104
465	0.125957	0.127987	0.129215	0.129089	0.12825	0.129303	0.131081	0.135406	0.139324	0.141792	0.142429	0.144886	0.15007	0.155701	0.161327	0.16893	0.176113	0.18615	0.196846	0.207302	0.217674	0.227108	0.236641	0.244873	0.254845	0.268795	0.283455	0.297749	0.315754	0.333591	0.355484	0.383465	0.408268	0.426003	0.446026	0.453213	0.457581	0.464554	0.462063	0.450745	0.438324	0.429005	0.415474	0.398285	0.388111	0.377823	0.363052	0.343407	0.341759
418.5	0.136898	0.1381	0.140064	0.141037	0.14101	0.143341	0.146198	0.151398	0.155212	0.158184	0.159752	0.164131	0.168602	0.175278	0.182823	0.191555	0.201366	0.213284	0.222721	0.23275	0.242558	0.250397	0.258743	0.267941	0.278717	0.293129	0.305695	0.318588	0.337311	0.356678	0.378929	0.407341	0.427826	0.441952	0.454678	0.458141	0.458275	0.459061	0.453957	0.443321	0.430244	0.417728	0.398365	0.377975	0.373264	0.358818	0.345547	0.342216	0.339005
375	0.157017	0.156914	0.158764	0.158978	0.161629	0.167461	0.173183	0.178593	0.181526	0.185688	0.186966	0.190571	0.195454	0.202835	0.213291	0.224625	0.235794	0.245998	0.256355	0.264557	0.272678	0.279442	0.285999	0.294178	0.303555	0.313808	0.325462	0.341633	0.363644	0.382664	0.403748	0.42638	0.441879	0.453262	0.457504	0.458656	0.455952	0.458595	0.452763	0.437988	0.421902	0.409004	0.384995	0.359451	0.35741	0.339355	0.328381	0.33189	0.334606
335	0.197838	0.196934	0.199306	0.199734	0.203575	0.212463	0.218784	0.222626	0.225544	0.23098	0.233273	0.236328	0.242531	0.253254	0.26445	0.275349	0.284996	0.294743	0.30331	0.310707	0.31665	0.320946	0.325443	0.332371	0.339661	0.347347	0.361328	0.381447	0.405701	0.419933	0.43644	0.454895	0.4688	0.472927	0.472206	0.465698	0.463417	0.471764	0.462593	0.444942	0.421402	0.397446	0.378536	0.347645	0.347664	0.332561	0.321079	0.32806	0.330261
299	0.259666	0.258343	0.260311	0.259678	0.263336	0.273075	0.278622	0.282963	0.287422	0.291916	0.294685	0.29866	0.306358	0.318886	0.332596	0.344078	0.353966	0.361748	0.367683	0.371941	0.375053	0.375824	0.376732	0.381096	0.391853	0.400246	0.414207	0.434036	0.456245	0.469658	0.485313	0.500317	0.49947	0.4958	0.491028	0.485229	0.485222	0.484295	0.474224	0.455185	0.430412	0.406517	0.381168	0.350185	0.345356	0.342072	0.336109	0.338055	0.337593
266.5	0.34549	0.342896	0.343391	0.345261	0.348618	0.358559	0.366196	0.370621	0.373215	0.375839	0.381218	0.389191	0.398422	0.411865	0.425476	0.435455	0.441078	0.447006	0.448967	0.451172	0.451942	0.451553	0.452087	0.457359	0.466537	0.475891	0.48999	0.508049	0.530411	0.543594	0.555344	0.55349	0.540894	0.53447	0.524479	0.51976	0.521049	0.506702	0.490757	0.477398	0.455029	0.433075	0.400158	0.376053	0.372414	0.369637	0.365746	0.365456	0.360455
237	0.455765	0.451118	0.447144	0.449211	0.452576	0.462921	0.469025	0.475212	0.474464	0.474876	0.482483	0.492744	0.502518	0.513145	0.522125	0.527817	0.536461	0.545296	0.551689	0.556366	0.558495	0.558159	0.55941	0.567398	0.580246	0.594261	0.612419	0.629463	0.648422	0.659966	0.659714	0.645012	0.631752	0.623329	0.604404	0.593964	0.588936	0.561001	0.538795	0.526451	0.499691	0.474274	0.434914	0.416782	0.412323	0.418709	0.41309	0.406193	0.397015
210	0.538239	0.533669	0.528244	0.525246	0.526695	0.534004	0.53923	0.540863	0.542191	0.548065	0.559372	0.565491	0.570404	0.579422	0.591858	0.602707	0.616272	0.631607	0.640625	0.647339	0.658569	0.667953	0.680862	0.700958	0.718445	0.736115	0.758118	0.77636	0.79229	0.793114	0.791473	0.784073	0.766922	0.752785	0.739918	0.721706	0.703419	0.657051	0.629688	0.608932	0.572189	0.539417	0.500099	0.472332	0.461884	0.466793	0.463024	0.455563	0.444077
185	0.563309	0.559326	0.553604	0.548447	0.545914	0.5457	0.549561	0.549545	0.554611	0.55658	0.553864	0.561478	0.577606	0.589523	0.59407	0.601212	0.622849	0.64772	0.673965	0.70874	0.744247	0.777939	0.809113	0.835495	0.858444	0.876831	0.897156	0.917892	0.935028	0.938904	0.938881	0.94532	0.931999	0.91922	0.907623	0.889893	0.85437	0.804184	0.754242	0.711109	0.658646	0.620296	0.578041	0.547699	0.52272	0.51292	0.507896	0.50774	0.497131
161.5	0.534821	0.526154	0.514328	0.508469	0.503586	0.497345	0.499313	0.502609	0.501984	0.500717	0.501831	0.516052	0.526886	0.521469	0.536362	0.574448	0.620178	0.683441	0.742157	0.808746	0.860962	0.898895	0.931671	0.967056	0.989868	1.00899	1.02693	1.03821	1.04945	1.0524	1.05676	1.07037	1.07809	1.09082	1.09496	1.08954	1.06657	1.02436	0.968102	0.9007	0.847668	0.79575	0.74432	0.708786	0.662464	0.62516	0.618607	0.614841	0.59634
139	0.414368	0.422211	0.437286	0.446381	0.441132	0.443207	0.457184	0.471069	0.489166	0.502258	0.507721	0.530487	0.534241	0.551086	0.59903	0.653381	0.703308	0.76059	0.814056	0.897339	0.953827	0.977875	0.996582	1.02963	1.06485	1.08615	1.09885	1.1006	1.10052	1.09796	1.09926	1.10825	1.12944	1.15359	1.17747	1.21106	1.23599	1.23532	1.19442	1.13873	1.09814	1.05121	1.00262	0.93298	0.859116	0.782757	0.74942	0.74826	0.725811
118	0.416077	0.437042	0.447571	0.472107	0.490784	0.5177	0.532043	0.559631	0.606628	0.669342	0.714172	0.741608	0.76413	0.801605	0.81897	0.804779	0.799225	0.79776	0.847107	0.906036	0.940308	0.96759	1.00873	1.05249	1.08078	1.09735	1.10745	1.1142	1.12186	1.12262	1.13081	1.14937	1.17018	1.17876	1.21294	1.25378	1.29467	1.29501	1.27415	1.25664	1.23322	1.21929	1.19521	1.15256	1.07959	1.00769	0.980377	0.968399	0.944702
99	0.722412	0.744141	0.734314	0.785767	0.852783	0.89856	0.936768	0.987305	1.05847	1.08704	1.12384	1.1192	1.09259	1.00458	0.895935	0.788574	0.699341	0.595886	0.616821	0.682617	0.739563	0.814941	0.898132	0.93457	0.972839	1.02103	1.05765	1.08667	1.11987	1.14587	1.15714	1.15732	1.17332	1.1888	1.21687	1.23538	1.26779	1.30859	1.32684	1.30429	1.30801	1.36831	1.42863	1.42847	1.39669	1.37882	1.3089	1.20683	1.09431
81.5	0.902649	0.913513	0.925171	0.951172	0.98761	0.985229	0.955444	0.892944	0.914917	0.945312	0.89624	0.718384	0.563354	0.389893	0.227417	0.124878	-0.0450439	-0.1427	-0.0384521	0.156982	0.276978	0.355713	0.447083	0.521484	0.593872	0.6698	0.740234	0.806824	0.891052	0.964111	0.999268	1.01776	1.06155	1.08603	1.13113	1.16531	1.19614	1.21738	1.21777	1.21327	1.18115	1.22418	1.28085	1.31575	1.35945	1.33939	1.254	1.14009	1.03012
[truncated: 41 more columns]

## Sheet: formaldehyde
hPa \ degN	-89	-87	-85	-83	-81	-79	-77	-75	-73	-71	-69	-67	-65	-63	-61	-59	-57	-55	-53	-51	-49	-47	-45	-43	-41	-39	-37	-35	-33	-31	-29	-27	-25	-23	-21	-19	-17	-15	-13	-11	-9	-7	-5	-3	-1	1	3	5	7
974	-999	-999	-999	-999	-6.00517e-06	-8.01198e-05	-4.83952e-05	-2.98768e-05	1.37575e-05	2.44789e-05	-3.04729e-06	-4.58583e-05	-4.91142e-05	-4.0859e-05	-7.7337e-06	2.10218e-05	-2.11373e-05	-3.68766e-05	-1.55568e-05	4.32879e-06	2.63005e-06	1.77771e-05	1.72406e-05	2.64421e-05	9.76771e-05	0.000144154	0.000176862	0.000284523	0.000351042	0.000358045	0.000308573	0.000516504	0.000706702	0.000789225	0.000716478	0.000524044	0.000707597	0.00111166	0.00127408	0.00141364	0.00324556	0.00628898	0.0112397	0.0480971	0.0318773	0.0477422	0.0288289	0.0188328	0.00878102
953	-999	-999	-999	2.50116e-05	-1.06618e-05	-4.36306e-05	-2.1372e-05	-7.85291e-06	-1.68458e-05	-2.28845e-05	-3.70257e-05	-3.33041e-05	-1.99154e-05	-2.03773e-05	3.50177e-06	1.83508e-05	2.66135e-05	2.31862e-05	2.30223e-05	3.5435e-05	1.47149e-05	6.30617e-05	5.85318e-05	6.50734e-05	0.000125468	0.000180274	0.000238746	0.000328511	0.000494689	0.000606865	0.000553489	0.000546128	0.00078541	0.00104487	0.00129902	0.000812411	0.000900149	0.0017271	0.00164342	0.00150508	0.00355935	0.006347	0.011512	0.0436101	0.032855	0.0499331	0.0351619	0.0278094	0.00878251
929.5	-999	-999	1.54413e-05	1.77808e-05	1.07624e-05	-2.75895e-05	-1.32807e-05	-8.75443e-07	-1.20066e-05	-2.15583e-05	-4.3273e-05	-3.10168e-05	-1.14292e-05	-1.3575e-05	7.689e-06	1.53407e-05	4.033e-05	4.44949e-05	4.36231e-05	4.89205e-05	5.25415e-05	7.32243e-05	6.49542e-05	0.000104964	0.000166491	0.000236437	0.000296637	0.000381768	0.000457406	0.000723809	0.00075835	0.000871867	0.00117779	0.00101918	0.0011608	0.00084573	0.00102586	0.00158727	0.00164807	0.00117737	0.00369942	0.00649023	0.011259	0.0359407	0.0340198	0.04509	0.0398547	0.0266541	0.00927466
903.5	-999	-999	9.98378e-06	1.85892e-06	1.54339e-05	-1.13696e-05	-1.92374e-05	-2.63005e-06	-4.13135e-06	-9.50322e-06	-3.3617e-05	-1.99303e-05	-1.54525e-05	-1.45882e-05	-8.19564e-07	1.38655e-05	2.3827e-05	3.33637e-05	3.61577e-05	4.44278e-05	5.56558e-05	5.82039e-05	7.44015e-05	9.98527e-05	0.000166774	0.000208825	0.000283301	0.000341028	0.000478446	0.00070256	0.000706851	0.000749618	0.00120997	0.000982165	0.00108272	0.000930786	0.00130045	0.00130147	0.00143814	0.00143325	0.00346333	0.00604868	0.0105757	0.0272948	0.0287023	0.0355482	0.0328205	0.021259	0.00843501
875	-999	-999	2.20537e-06	-4.76465e-06	5.53578e-06	-8.16584e-06	-2.74517e-05	-1.25319e-05	-6.20633e-06	-5.99772e-06	-1.72779e-05	-1.30311e-05	-1.64658e-05	-9.68575e-06	-5.08875e-06	9.96888e-06	1.27926e-05	2.76044e-05	3.6478e-05	2.92882e-05	4.78998e-05	4.56721e-05	5.8502e-05	8.89599e-05	0.000190333	0.000235751	0.000284806	0.000345856	0.000468254	0.000711232	0.000607342	0.000685632	0.000969708	0.000794113	0.000993311	0.00103307	0.0011825	0.000926256	0.00164217	0.00208694	0.00325835	0.00567037	0.00974101	0.0199705	0.0225724	0.0256414	0.0247675	0.0165404	0.00737739
842.5	-999	-999	-2.65241e-06	-3.18512e-06	5.58794e-08	-1.49682e-05	-2.61813e-05	-2.19494e-05	-1.09598e-05	-9.76771e-06	-1.53854e-05	-1.54525e-05	-1.26287e-05	-1.0781e-05	-7.58469e-06	6.69807e-06	6.48201e-06	2.49743e-05	3.14116e-05	3.66792e-05	4.97326e-05	5.51492e-05	6.31064e-05	0.000106603	0.000150934	0.000235066	0.000260621	0.00030455	0.000429153	0.000455201	0.000653744	0.000618428	0.000855654	0.000865817	0.0011524	0.00114167	0.00120527	0.000817239	0.0018245	0.00242209	0.00303227	0.00529855	0.00886321	0.014723	0.0168255	0.0187392	0.0183724	0.0124137	0.00672084
805	-999	-999	-4.93228e-06	-4.96954e-06	-1.38208e-06	-1.57654e-05	-2.50861e-05	-1.70581e-05	-1.62683e-05	-1.87047e-05	-1.68309e-05	-1.79633e-05	-1.65477e-05	-1.53482e-05	-9.24617e-06	3.53158e-06	9.29087e-06	1.98707e-05	2.49445e-05	3.90187e-05	5.45308e-05	6.57886e-05	8.066e-05	0.000103384	0.000129357	0.000176206	0.000229016	0.000275895	0.000347584	0.000343174	0.000605613	0.000608295	0.000738293	0.000917733	0.00114098	0.00121486	0.0011633	0.00105673	0.00173259	0.00237244	0.00328559	0.00505179	0.00752926	0.0111284	0.0131446	0.0139759	0.0136882	0.00958019	0.0054844
762.5	-999	-999	-3.83332e-06	-2.19792e-06	-2.68221e-06	-1.39102e-05	-1.99527e-05	-1.82763e-05	-1.66148e-05	-1.70805e-05	-1.84923e-05	-2.09212e-05	-1.42306e-05	-7.82311e-06	-9.55164e-06	-4.24683e-07	7.24196e-06	1.60411e-05	1.7561e-05	2.55257e-05	5.60731e-05	8.0049e-05	8.62777e-05	8.9705e-05	0.000110567	0.000134945	0.000186831	0.000242323	0.00031966	0.000387251	0.000521839	0.000548691	0.000804126	0.000925809	0.00112188	0.00116959	0.00128138	0.00125352	0.00168276	0.00248694	0.00305128	0.00429541	0.00620556	0.0086194	0.0102333	0.0107841	0.00975186	0.0073697	0.00428885
716	-999	7.64802e-06	-5.98654e-06	8.60542e-07	8.56817e-07	-1.4253e-05	-1.50129e-05	-1.77212e-05	-1.84961e-05	-1.63503e-05	-2.14837e-05	-2.02581e-05	-9.11951e-06	-6.07222e-06	-1.0334e-05	-3.2261e-06	5.47618e-06	1.39028e-05	2.11746e-05	2.74926e-05	5.33313e-05	7.61971e-05	8.17627e-05	7.96169e-05	9.21041e-05	0.000120789	0.000164747	0.000227839	0.000328243	0.00041832	0.000499323	0.000552833	0.00068897	0.000859261	0.00108153	0.00129893	0.00145507	0.00165132	0.00177756	0.00220886	0.00277352	0.00380129	0.0054875	0.006982	0.00807151	0.0082995	0.00707719	0.0057956	0.00333515
667	1.90698e-05	-2.04146e-06	-3.27826e-06	1.74716e-06	-1.96323e-06	-1.35824e-05	-2.11857e-05	-2.18451e-05	-1.53407e-05	-2.08877e-05	-2.02172e-05	-1.76057e-05	-9.6038e-06	-7.39843e-06	-9.21637e-06	-4.11272e-06	4.19468e-06	1.45137e-05	2.34544e-05	3.23355e-05	4.90099e-05	6.36652e-05	7.12797e-05	7.58767e-05	9.44138e-05	0.000118718	0.000161126	0.00021933	0.000301227	0.000338301	0.000417933	0.000497416	0.000686601	0.000854343	0.00101992	0.00134698	0.001506	0.00181422	0.00203559	0.0023945	0.00280032	0.00347745	0.00470874	0.00584677	0.00659314	0.00626317	0.00540289	0.00451571	0.00293607
616.5	-3.48687e-06	-9.28715e-06	-6.27711e-06	-5.10365e-07	-4.77582e-06	-1.79186e-05	-2.544e-05	-2.1182e-05	-1.77249e-05	-1.79633e-05	-1.96695e-05	-1.70767e-05	-1.10939e-05	-1.11982e-05	-1.55047e-05	-1.63391e-05	-2.03401e-06	7.39843e-06	1.90735e-05	2.71201e-05	4.67524e-05	5.60358e-05	6.62133e-05	7.18608e-05	9.47788e-05	0.000119418	0.000160784	0.000194862	0.00024499	0.000298381	0.000355139	0.000438973	0.000625938	0.000800401	0.000964969	0.00127801	0.00146931	0.00185755	0.00199315	0.00212207	0.00254413	0.00319108	0.00399551	0.0051192	0.00558531	0.00512818	0.00448292	0.00373897	0.00256687
565	-2.07126e-06	-6.96629e-07	-3.96371e-06	-2.8573e-06	-5.55813e-06	-1.86041e-05	-2.40952e-05	-1.73226e-05	-1.51657e-05	-1.91517e-05	-1.94982e-05	-1.96062e-05	-1.50651e-05	-1.29044e-05	-1.77249e-05	-1.41263e-05	-5.13345e-06	4.58956e-06	1.39326e-05	2.85655e-05	4.84213e-05	5.427e-05	5.59315e-05	6.57737e-05	9.31844e-05	0.000113741	0.000146136	0.000174552	0.000208691	0.000267044	0.00034298	0.000422418	0.000545532	0.000745445	0.000904486	0.0011539	0.00139262	0.00164212	0.00181474	0.00198118	0.00237209	0.00275505	0.00347888	0.00451985	0.00490332	0.00450911	0.00388126	0.00322105	0.00222585
514	1.06506e-05	4.92856e-06	-1.85892e-06	-2.11969e-06	-1.15484e-06	-1.52066e-05	-2.25678e-05	-2.01948e-05	-1.6503e-05	-1.84029e-05	-1.88649e-05	-1.9148e-05	-1.80639e-05	-1.70209e-05	-1.93268e-05	-1.50055e-05	-8.08388e-06	4.05312e-06	9.79006e-06	2.30968e-05	3.73498e-05	4.32804e-05	4.85331e-05	5.99623e-05	7.70092e-05	0.000100411	0.000120774	0.000144608	0.000180766	0.000227705	0.000300884	0.000376403	0.000473216	0.000641704	0.00080125	0.00100106	0.00122906	0.00134617	0.00153577	0.00172625	0.00210795	0.0024538	0.00305158	0.00401515	0.00429052	0.00404419	0.00341365	0.00279534	0.00193061
465	1.93678e-05	4.82425e-06	-2.71574e-06	-3.01749e-07	2.08244e-06	-1.49496e-05	-2.19829e-05	-2.11112e-05	-1.76877e-05	-1.35079e-05	-1.46329e-05	-1.83433e-05	-2.33091e-05	-2.07983e-05	-1.68756e-05	-1.5635e-05	-7.42078e-06	2.21282e-06	5.81145e-06	1.62944e-05	2.53916e-05	3.03015e-05	4.01363e-05	5.2847e-05	6.84783e-05	8.8729e-05	9.90331e-05	0.000116989	0.000146583	0.000197269	0.000256248	0.000315547	0.000413671	0.000560552	0.000673607	0.000839218	0.000975534	0.00108722	0.00123207	0.00149316	0.00188522	0.00217834	0.00270873	0.00355831	0.0037993	0.00364886	0.00313702	0.00247356	0.00171667
418.5	1.04606e-05	-3.49805e-06	-6.10203e-06	-1.05426e-06	-1.81049e-06	-2.02991e-05	-1.96584e-05	-1.77696e-05	-8.40053e-06	-1.01849e-05	-1.05873e-05	-1.63876e-05	-2.25529e-05	-1.55792e-05	-1.61752e-05	-1.76989e-05	-1.34744e-05	-4.75347e-06	4.02331e-06	9.44734e-06	1.33738e-05	1.9975e-05	3.48687e-05	4.32655e-05	5.22882e-05	6.32256e-05	7.25389e-05	8.93176e-05	0.000113964	0.000158891	0.00021401	0.000273511	0.000367194	0.000473008	0.000567809	0.000675261	0.000825971	0.000953034	0.00098519	0.00127201	0.00172959	0.00198294	0.00272341	0.00377728	0.00400813	0.00391871	0.00331801	0.0025239	0.00170724
375	-6.34417e-06	-1.20439e-05	-1.07214e-05	-5.51343e-07	-3.35276e-08	-1.29007e-05	-1.23307e-05	-3.49805e-06	5.03659e-06	2.45497e-06	7.52881e-06	-8.67993e-07	-6.16908e-06	-1.49384e-06	-3.2559e-06	-1.05612e-05	-8.06898e-06	-1.47894e-06	1.07214e-05	1.52141e-05	2.10814e-05	2.4341e-05	3.61651e-05	4.48897e-05	5.05e-05	5.33089e-05	6.06254e-05	7.06166e-05	8.76412e-05	0.000121258	0.000177085	0.000240892	0.000327356	0.000404306	0.000469521	0.000529349	0.000699535	0.000779793	0.000803173	0.00105958	0.00176078	0.00205064	0.0030566	0.00456552	0.00490777	0.00502495	0.00430273	0.00307971	0.00182801
335	-6.72415e-06	-1.08443e-05	-7.14883e-06	3.25963e-06	8.53837e-06	4.64171e-06	5.4948e-06	1.98856e-05	2.68072e-05	2.30744e-05	2.60323e-05	1.91145e-05	1.78628e-05	2.64049e-05	1.8172e-05	1.34669e-05	1.57319e-05	2.30111e-05	3.34643e-05	3.9354e-05	4.43012e-05	4.5985e-05	5.28209e-05	5.30183e-05	5.10216e-05	6.35684e-05	6.83814e-05	5.25042e-05	5.74663e-05	9.76548e-05	0.000160389	0.000211991	0.000256263	0.000323944	0.000352882	0.000393838	0.000553682	0.000625059	0.000622839	0.000859246	0.00168823	0.00221145	0.00337371	0.00552717	0.00598259	0.00642854	0.00568314	0.0039947	0.00211206
299	9.89065e-06	8.94442e-06	9.31695e-06	1.75796e-05	2.01389e-05	2.34991e-05	2.06381e-05	3.21493e-05	3.5204e-05	3.76515e-05	3.65525e-05	3.01003e-05	3.02307e-05	3.91416e-05	3.55281e-05	3.71784e-05	4.11347e-05	4.20474e-05	5.24409e-05	5.54286e-05	5.71646e-05	5.86994e-05	6.76066e-05	6.09793e-05	5.46016e-05	7.49975e-05	7.12201e-05	4.67747e-05	3.40715e-05	7.1466e-05	0.000118636	0.000171699	0.000236593	0.000282556	0.000306807	0.000387058	0.000483006	0.000662953	0.000638455	0.000809684	0.00172207	0.00254072	0.00402123	0.00659595	0.00709608	0.00772399	0.00707461	0.00521599	0.0025727
266.5	2.55723e-05	1.97832e-05	1.59889e-05	1.70339e-05	1.26623e-05	2.21618e-05	1.83154e-05	3.03183e-05	3.49842e-05	4.08869e-05	3.71747e-05	3.16296e-05	2.64756e-05	3.58857e-05	3.86629e-05	3.89498e-05	3.83966e-05	3.91994e-05	5.01033e-05	5.90123e-05	5.79022e-05	5.71907e-05	5.75595e-05	5.55813e-05	6.15343e-05	7.25724e-05	6.16312e-05	4.51319e-05	-1.88127e-06	4.28855e-05	7.63535e-05	0.000132538	0.000238657	0.000313245	0.000379927	0.000513032	0.000632882	0.000814632	0.000928253	0.000999808	0.00207055	0.00306121	0.00505464	0.00787067	0.00841281	0.00919062	0.00844058	0.00621587	0.0031345
237	2.40374e-05	8.13976e-06	5.7295e-06	1.99862e-06	2.62447e-06	1.68774e-05	2.2389e-05	3.38014e-05	3.79682e-05	3.72333e-05	2.76798e-05	2.46027e-05	2.24486e-05	2.41166e-05	3.2072e-05	3.15737e-05	2.84258e-05	3.0905e-05	4.02257e-05	4.52567e-05	4.92204e-05	5.21801e-05	5.06137e-05	4.55398e-05	4.31165e-05	4.86933e-05	3.49022e-05	2.68817e-05	3.53903e-07	3.45409e-05	0.000121836	0.000165068	0.000247359	0.00036522	0.000489764	0.00060048	0.000734255	0.000926316	0.00117493	0.00134745	0.00245678	0.00364712	0.00594293	0.0091226	0.00962554	0.0103112	0.00941883	0.00701618	0.00381792
210	1.23102e-05	4.17791e-06	5.02355e-06	5.31599e-06	8.16584e-06	1.60113e-05	2.3352e-05	2.92379e-05	2.65986e-05	2.27597e-05	1.54832e-05	1.19368e-05	1.18883e-05	1.12401e-05	1.09887e-05	9.31881e-06	1.03172e-05	1.44076e-05	2.11354e-05	2.65623e-05	2.2755e-05	2.30651e-05	2.69935e-05	3.19928e-05	2.81855e-05	2.96552e-05	2.40318e-05	4.13656e-05	5.95469e-05	0.000109635	0.000215396	0.00021106	0.00027582	0.000388846	0.000522174	0.000646695	0.000721842	0.00108065	0.00127564	0.00145619	0.00251754	0.00398588	0.00663297	0.0104336	0.010866	0.0114861	0.0103924	0.00782539	0.0043703
185	1.09486e-05	8.78703e-06	1.24853e-05	7.82497e-06	1.03228e-05	1.4306e-05	1.44206e-05	1.4347e-05	1.18674e-05	9.49204e-06	7.87247e-06	1.18883e-06	5.4948e-07	3.67872e-08	-2.53273e-06	1.37882e-06	4.19002e-06	6.72275e-06	1.85752e-06	-6.38841e-06	-7.45617e-06	-6.91088e-06	5.30388e-07	1.86143e-05	2.65744e-05	3.14564e-05	4.14327e-05	5.50095e-05	7.13374e-05	9.95323e-05	0.000127971	0.000167374	0.000274971	0.000377044	0.000594445	0.000788108	0.000805438	0.00110337	0.0014053	0.00161062	0.00292605	0.00460331	0.0073998	0.0116391	0.01222	0.0125881	0.0110621	0.00820437	0.00486989
161.5	1.14143e-05	1.55326e-05	1.80956e-05	1.01039e-05	1.53184e-05	1.02557e-05	3.81609e-06	5.43473e-06	7.13114e-06	3.89712e-06	-4.44241e-07	-4.29479e-06	-3.68292e-06	-8.99239e-06	-1.21356e-05	-3.23015e-05	-3.98271e-05	-5.77373e-05	-5.41052e-05	-4.5348e-05	-7.66749e-05	-3.63295e-05	-5.73429e-05	-1.95373e-05	-1.82493e-06	1.50795e-05	1.57095e-05	1.51396e-05	2.52584e-05	4.67217e-05	7.40197e-05	0.000116382	0.000194632	0.000201676	0.000276037	0.000454061	0.000506118	0.000846803	0.0012802	0.0018404	0.00317852	0.00497007	0.00809558	0.0123495	0.0131068	0.0134863	0.011851	0.00844049	0.00485043
139	1.04159e-05	8.04756e-06	7.89855e-06	2.69851e-05	8.706e-06	-3.56883e-06	-5.1083e-06	-3.31644e-06	-1.60467e-05	-1.78558e-05	-9.50648e-06	-8.01682e-06	-4.01083e-05	-5.93234e-05	-0.000203133	-0.000489583	-0.0003502	0.0002129	-0.000314709	0.000123668	-0.000706179	-0.000515874	-0.000237404	-6.93076e-05	-1.6633e-05	2.31201e-06	-2.35206e-06	3.10596e-07	9.5861e-06	6.87046e-05	0.000143179	0.00011193	7.32504e-05	9.63286e-05	-3.64222e-05	2.64421e-05	0.000280358	0.000358783	0.000624321	0.00130259	0.00242905	0.00446147	0.00752017	0.0121272	0.0121604	0.0121984	0.0112502	0.00770824	0.0041217
118	0.000258699	-2.47182e-05	-5.82244e-05	-4.27952e-05	-5.343e-05	-8.21669e-05	-0.000126343	-0.00114949	-0.000569396	-0.000200206	-6.12922e-05	-9.86643e-06	6.58073e-05	0.000258688	0.000883788	0.00219078	0.000411939	-5.81928e-05	-0.000567932	-0.000569507	-0.000775814	-0.000515351	-0.000329392	-8.47494e-05	-2.59434e-05	5.22006e-06	6.12391e-06	1.7425e-06	2.03778e-05	6.47907e-05	9.018e-05	2.34824e-05	6.0874e-05	0.000218574	0.000165874	0.000240371	0.000281729	0.000346657	0.000561513	0.00108636	0.0019208	0.00300896	0.00481661	0.00797673	0.00839628	0.00797942	0.00668872	0.00434193	0.00212583
99	-0.00128704	0.000858359	-0.00203265	0.00035632	-0.00048342	-0.00119074	0.00094866	-0.000279263	-0.002564	-0.000488132	8.45268e-05	-0.000569128	-8.56072e-06	-0.000164434	-0.000906244	0.00186946	0.00180224	0.000475757	0.00093767	-0.00105201	-0.000688598	-0.000365095	-0.000372362	-0.000156694	-2.99569e-05	1.56523e-05	9.39798e-06	8.44803e-06	2.33189e-05	4.65917e-05	6.68494e-05	0.000114372	0.000118408	0.000141625	4.40744e-05	0.000161693	0.000166081	1.83368e-05	3.05474e-05	0.000224736	0.000537191	0.000716969	0.000890493	0.00208175	0.00303425	0.00276971	0.00241135	0.00136939	0.000190983
81.5	-0.0098116	-0.000378862	-0.00207059	-0.00227389	-0.00241397	0.000813879	0.000498615	-0.00231441	-0.00191145	-0.000692703	-0.000581048	-0.00140774	-0.00161871	0.00229497	0.00393787	0.000544354	0.000677526	0.000670478	0.00024166	6.59227e-05	1.00434e-05	-0.000704374	8.9338e-05	-0.00042202	-0.000217992	-2.08672e-05	1.8565e-05	4.88851e-06	1.12811e-05	9.43337e-06	2.51262e-05	3.77963e-05	3.21269e-05	2.26372e-05	1.65612e-05	3.59258e-05	2.61478e-05	4.77843e-05	6.12545e-05	-3.09618e-06	4.61144e-05	7.36406e-05	3.28226e-05	0.000111834	0.000299683	0.000351823	0.000207941	0.000118256	-1.20802e-05
[truncated: 41 more columns]

## Sheet: CO
hPa \ degN	-89	-87	-85	-83	-81	-79	-77	-75	-73	-71	-69	-67	-65	-63	-61	-59	-57	-55	-53	-51	-49	-47	-45	-43	-41	-39	-37	-35	-33	-31	-29	-27	-25	-23	-21	-19	-17	-15	-13	-11	-9	-7	-5	-3	-1	1	3	5	7
974	-999	-999	-999	-999	0.213245	0.211639	0.207542	0.208656	0.207104	0.205891	0.206768	0.207188	0.206326	0.206623	0.206524	0.211151	0.209232	0.210472	0.211609	0.213478	0.214443	0.216576	0.219158	0.220631	0.222607	0.224438	0.22562	0.228374	0.228653	0.23164	0.237225	0.245422	0.249268	0.255714	0.265347	0.276237	0.291855	0.313118	0.335487	0.368553	0.427818	0.529587	0.570541	0.764099	0.762299	0.779823	0.736275	0.622086	0.503593
953	-999	-999	-999	0.213684	0.211788	0.209846	0.208126	0.206581	0.206299	0.206417	0.207741	0.207497	0.207405	0.207542	0.208057	0.208694	0.210117	0.211372	0.212959	0.214226	0.215557	0.21751	0.219402	0.221306	0.222321	0.225548	0.226765	0.229305	0.230412	0.233185	0.239227	0.247616	0.252625	0.257698	0.271805	0.284142	0.300705	0.321884	0.355019	0.378273	0.428368	0.512894	0.563278	0.744186	0.737114	0.794304	0.748238	0.672493	0.485985
929.5	-999	-999	0.213539	0.212978	0.211651	0.209263	0.20752	0.206768	0.205982	0.206699	0.207527	0.207157	0.207546	0.20723	0.207935	0.208691	0.210232	0.211937	0.213722	0.214828	0.215996	0.217049	0.219639	0.222885	0.224522	0.227707	0.229572	0.231308	0.231529	0.236107	0.24152	0.25267	0.257324	0.258995	0.272011	0.281395	0.298286	0.323936	0.354462	0.349281	0.424919	0.50193	0.553452	0.723312	0.760658	0.795006	0.768005	0.64254	0.505241
903.5	-999	-999	0.212616	0.211712	0.210209	0.208538	0.207031	0.206356	0.205723	0.206055	0.206947	0.207233	0.207516	0.20739	0.20797	0.209103	0.210529	0.212364	0.214184	0.2155	0.216484	0.217144	0.220253	0.224281	0.226524	0.229118	0.232361	0.232613	0.233246	0.239685	0.245682	0.252464	0.260635	0.264435	0.276527	0.286903	0.299545	0.31707	0.337646	0.361549	0.42762	0.474037	0.56546	0.702072	0.745071	0.774048	0.720657	0.584969	0.469208
875	-999	-999	0.213188	0.211868	0.209816	0.208145	0.206696	0.206944	0.206242	0.206982	0.207253	0.208286	0.208332	0.208508	0.209087	0.210339	0.211864	0.21357	0.215652	0.217022	0.218945	0.220852	0.223118	0.226551	0.230259	0.233421	0.237144	0.237453	0.237331	0.244129	0.248642	0.257912	0.26783	0.268677	0.279793	0.291794	0.306458	0.322617	0.358368	0.390602	0.420441	0.492584	0.588936	0.678337	0.730843	0.723083	0.682205	0.574066	0.454773
842.5	-999	-999	0.213604	0.212246	0.210011	0.208401	0.206997	0.207138	0.207325	0.207932	0.207932	0.209091	0.209099	0.209465	0.210579	0.211582	0.213062	0.215187	0.217216	0.219257	0.221729	0.224754	0.227352	0.229607	0.232986	0.2369	0.239891	0.243362	0.241718	0.247688	0.256538	0.263939	0.269646	0.272453	0.284737	0.298538	0.315521	0.325531	0.363159	0.40419	0.426674	0.502922	0.59758	0.657173	0.701805	0.679855	0.630569	0.544601	0.458862
805	-999	-999	0.214207	0.212349	0.210857	0.209328	0.20837	0.207848	0.208076	0.209087	0.208832	0.210007	0.210049	0.210857	0.211876	0.212646	0.214386	0.216648	0.219368	0.222275	0.225647	0.229538	0.23317	0.235523	0.239635	0.24408	0.247654	0.253326	0.254631	0.261032	0.268234	0.276077	0.285004	0.291008	0.302124	0.318192	0.328339	0.337921	0.362099	0.404861	0.457924	0.522285	0.59919	0.644058	0.665512	0.659492	0.593445	0.50676	0.444389
762.5	-999	-999	0.214458	0.213394	0.211918	0.210091	0.209297	0.209469	0.20985	0.210747	0.210903	0.211769	0.212067	0.213036	0.213928	0.215805	0.217873	0.221035	0.224392	0.227455	0.231964	0.236351	0.240681	0.244164	0.248886	0.253571	0.258732	0.265938	0.272987	0.280197	0.285881	0.294006	0.308357	0.316719	0.331947	0.342598	0.354042	0.363419	0.37571	0.424591	0.470406	0.51899	0.586136	0.629921	0.643311	0.63356	0.549545	0.47654	0.424599
716	-999	0.213966	0.214859	0.213921	0.212524	0.211525	0.210396	0.211365	0.212059	0.212936	0.213146	0.214272	0.214523	0.215519	0.217064	0.219124	0.222477	0.225689	0.229286	0.233559	0.23838	0.243103	0.248093	0.252483	0.257442	0.262894	0.270069	0.279503	0.290527	0.300209	0.306671	0.316551	0.325867	0.339333	0.35656	0.373055	0.386253	0.395889	0.406029	0.442703	0.482796	0.522301	0.590996	0.624245	0.637321	0.614594	0.520721	0.467934	0.413086
667	0.214161	0.215427	0.215958	0.214943	0.213753	0.213192	0.212761	0.213215	0.214062	0.215076	0.215767	0.216702	0.216896	0.218025	0.219921	0.22319	0.22681	0.230171	0.23439	0.239407	0.244514	0.250385	0.256474	0.261757	0.267361	0.274128	0.28299	0.29306	0.304184	0.314346	0.321877	0.334518	0.347092	0.36377	0.381111	0.404663	0.418846	0.436539	0.45401	0.49131	0.522102	0.550552	0.601593	0.649002	0.662041	0.613869	0.52594	0.467751	0.433464
616.5	0.216015	0.21629	0.216393	0.21632	0.215485	0.215134	0.215065	0.215633	0.216488	0.217991	0.219219	0.220032	0.220695	0.222282	0.225204	0.229309	0.233036	0.236969	0.241459	0.247078	0.253937	0.26062	0.267372	0.273476	0.280746	0.288582	0.298264	0.307213	0.318466	0.330765	0.339584	0.353241	0.37014	0.391083	0.413445	0.440392	0.457497	0.486465	0.499214	0.53257	0.565079	0.593559	0.633301	0.684418	0.692413	0.636047	0.579391	0.519012	0.464203
565	0.218803	0.219067	0.218792	0.217808	0.217213	0.217175	0.217812	0.218979	0.220451	0.222176	0.223103	0.223843	0.224659	0.227371	0.23175	0.235851	0.239891	0.244564	0.249851	0.256592	0.264324	0.270981	0.277794	0.284996	0.293602	0.302834	0.311958	0.32164	0.33342	0.343903	0.35717	0.370506	0.388542	0.413948	0.443268	0.470901	0.498138	0.523071	0.540192	0.571617	0.602959	0.623795	0.659683	0.712311	0.719902	0.670441	0.624039	0.580078	0.515266
514	0.221767	0.221973	0.221909	0.220703	0.220459	0.221169	0.222225	0.223751	0.225414	0.226936	0.227814	0.228504	0.230225	0.233734	0.238552	0.243553	0.248215	0.253254	0.259972	0.267513	0.275181	0.281475	0.288246	0.296021	0.30513	0.315048	0.324921	0.335495	0.348328	0.359093	0.374779	0.391563	0.413147	0.443413	0.473717	0.50248	0.532753	0.557297	0.580986	0.603584	0.631012	0.65377	0.702385	0.756477	0.755318	0.713287	0.669304	0.620476	0.566498
465	0.224911	0.225601	0.225746	0.22504	0.225334	0.22662	0.227715	0.229752	0.231663	0.233017	0.233795	0.235107	0.237743	0.241707	0.24649	0.251961	0.257217	0.264118	0.271793	0.278984	0.286457	0.293098	0.300362	0.308174	0.316986	0.327446	0.337067	0.349419	0.363396	0.374786	0.391693	0.413292	0.438942	0.473419	0.50309	0.530983	0.562286	0.590523	0.613396	0.635704	0.664169	0.692886	0.741867	0.792183	0.790192	0.755562	0.719543	0.663635	0.608719
418.5	0.230305	0.230812	0.231201	0.231266	0.232334	0.234192	0.235435	0.237671	0.239452	0.241055	0.242428	0.244595	0.247601	0.251633	0.256786	0.262917	0.269409	0.277573	0.28566	0.292694	0.299988	0.306839	0.314568	0.32283	0.331367	0.341843	0.349922	0.362343	0.375824	0.390976	0.411926	0.437126	0.470039	0.506165	0.535179	0.563538	0.597641	0.623238	0.644051	0.66655	0.700836	0.724556	0.776772	0.812447	0.816422	0.799248	0.757912	0.700714	0.646103
375	0.23827	0.238701	0.239025	0.239326	0.241146	0.243771	0.245678	0.247887	0.249912	0.252407	0.254051	0.256199	0.259136	0.263538	0.268726	0.275795	0.283833	0.292747	0.301392	0.308464	0.315224	0.322052	0.329552	0.337013	0.345154	0.353844	0.361237	0.372246	0.386688	0.40419	0.429543	0.4608	0.497559	0.536087	0.566086	0.593185	0.620758	0.643593	0.662766	0.683014	0.731377	0.754745	0.788513	0.814293	0.848015	0.843513	0.799416	0.726357	0.65564
335	0.252338	0.251724	0.252483	0.253178	0.255692	0.259296	0.26141	0.263779	0.266521	0.269741	0.271431	0.273968	0.277584	0.283436	0.290318	0.298954	0.307877	0.316658	0.324646	0.331741	0.337776	0.344208	0.349777	0.356201	0.363174	0.371323	0.380615	0.390877	0.405426	0.424088	0.45591	0.493645	0.534035	0.568657	0.601334	0.621872	0.640244	0.660759	0.66256	0.686348	0.727547	0.762398	0.806953	0.816193	0.851685	0.877121	0.831734	0.743591	0.665421
299	0.276634	0.275639	0.276546	0.276665	0.279396	0.284199	0.286797	0.289738	0.293346	0.297173	0.299107	0.302826	0.308182	0.31601	0.325859	0.33564	0.344025	0.351524	0.359024	0.3647	0.368698	0.373001	0.376778	0.381027	0.388847	0.397247	0.406532	0.417435	0.433083	0.456665	0.490662	0.530762	0.568832	0.602997	0.63327	0.646599	0.667961	0.688591	0.678307	0.692352	0.723129	0.770508	0.818642	0.844299	0.849648	0.882744	0.843796	0.76696	0.687088
266.5	0.320068	0.319702	0.319458	0.31916	0.322052	0.328308	0.331619	0.334663	0.337975	0.342537	0.346115	0.352501	0.360168	0.370277	0.381248	0.390846	0.397522	0.403671	0.409233	0.412689	0.414131	0.414978	0.415398	0.418922	0.425087	0.432533	0.444984	0.458717	0.475555	0.50296	0.536308	0.569519	0.603813	0.635399	0.658073	0.682404	0.709663	0.718842	0.71479	0.724007	0.75882	0.795769	0.83271	0.874023	0.876907	0.885498	0.837234	0.759743	0.684357
237	0.378891	0.379669	0.378227	0.378838	0.382706	0.389412	0.393486	0.397186	0.399872	0.405525	0.411255	0.419357	0.429199	0.439941	0.450722	0.459183	0.465721	0.471428	0.47683	0.479797	0.48114	0.480591	0.479126	0.479759	0.482162	0.489952	0.504272	0.519371	0.535873	0.561348	0.591393	0.623451	0.658539	0.691414	0.711456	0.733597	0.752922	0.75309	0.7593	0.770615	0.795105	0.815979	0.829689	0.897606	0.889755	0.873985	0.822609	0.749825	0.678383
210	0.430214	0.432274	0.431763	0.43325	0.437737	0.443985	0.449379	0.454178	0.459114	0.465996	0.47303	0.480408	0.489471	0.498978	0.508865	0.517578	0.525513	0.533371	0.539818	0.54406	0.546455	0.54818	0.54821	0.548729	0.550987	0.559158	0.57206	0.587509	0.608635	0.633644	0.669258	0.710281	0.746445	0.777397	0.799591	0.803101	0.810471	0.812782	0.814697	0.816025	0.822037	0.834549	0.861862	0.91835	0.893303	0.86615	0.811798	0.741013	0.680321
185	0.460037	0.461205	0.46154	0.463654	0.467964	0.472977	0.477974	0.482559	0.487617	0.492409	0.497368	0.502655	0.508537	0.515663	0.523857	0.533203	0.54393	0.554626	0.564903	0.573402	0.580818	0.587578	0.592232	0.597038	0.604248	0.614204	0.629326	0.650314	0.677109	0.707764	0.740211	0.794205	0.840378	0.871361	0.898537	0.904953	0.905495	0.902184	0.896736	0.886742	0.87513	0.888771	0.918419	0.955193	0.913376	0.876183	0.805313	0.732124	0.663757
161.5	0.456863	0.457787	0.458618	0.460007	0.462509	0.464577	0.465775	0.4683	0.469543	0.471405	0.473419	0.476616	0.480377	0.486031	0.492889	0.502983	0.515923	0.531021	0.546524	0.561172	0.575974	0.591019	0.604607	0.617729	0.631218	0.646034	0.6651	0.686493	0.715805	0.748306	0.782631	0.833466	0.882874	0.932327	0.97142	1.01073	1.0388	1.03803	1.0275	0.988045	0.997856	1.01192	1.03702	1.04964	0.981155	0.931618	0.844208	0.761154	0.691399
139	0.403748	0.401352	0.400558	0.39579	0.392639	0.389694	0.38649	0.3834	0.379463	0.380806	0.381744	0.387054	0.392227	0.398537	0.408752	0.423576	0.442436	0.464493	0.486824	0.509773	0.530685	0.551987	0.571983	0.590317	0.609177	0.62793	0.64698	0.666405	0.691338	0.727631	0.771645	0.822098	0.876709	0.923775	0.972733	1.02351	1.05271	1.06583	1.05353	1.04527	1.06753	1.12408	1.14478	1.2189	1.08778	1.00179	0.898346	0.815239	0.734329
118	0.224648	0.221405	0.219345	0.211754	0.206383	0.202332	0.196678	0.186317	0.183128	0.190918	0.201286	0.218102	0.235725	0.256058	0.281624	0.312141	0.340256	0.371117	0.402367	0.433456	0.462662	0.490585	0.515686	0.539108	0.562134	0.584099	0.604713	0.624039	0.643234	0.669739	0.697418	0.730713	0.778152	0.823563	0.862457	0.907265	0.927322	0.957001	0.973915	1.02937	1.05505	1.06644	1.06502	1.08977	1.02484	0.95192	0.845688	0.76207	0.723106
99	-0.0440979	-0.0449982	-0.0699158	-0.0774231	-0.0898285	-0.100464	-0.102249	-0.109253	-0.112106	-0.0959167	-0.069458	-0.0370941	-0.00282288	0.0317078	0.0721283	0.126968	0.175827	0.218285	0.262787	0.303314	0.343887	0.382004	0.416557	0.449165	0.480682	0.510147	0.537231	0.563911	0.592003	0.623505	0.657707	0.693016	0.731819	0.76503	0.79026	0.820854	0.821632	0.839569	0.86364	0.900574	0.942398	0.926964	0.891342	0.91362	0.934692	0.829559	0.733513	0.6343	0.569336
81.5	-0.368607	-0.319412	-0.332748	-0.34346	-0.344482	-0.337601	-0.339966	-0.348206	-0.329544	-0.295624	-0.253311	-0.20694	-0.157379	-0.104019	-0.0546875	-0.0105286	0.0364838	0.0796661	0.120514	0.158081	0.194	0.22509	0.255524	0.283745	0.315887	0.349602	0.382912	0.415321	0.448334	0.483253	0.519913	0.558472	0.598587	0.637314	0.67215	0.707268	0.741035	0.766296	0.782951	0.795937	0.799767	0.78688	0.736786	0.706947	0.68325	0.650276	0.622559	0.584175	0.552635
[truncated: 41 more columns]

## Sheet: alkyl nitrates
hPa \ degN	-89	-87	-85	-83	-81	-79	-77	-75	-73	-71	-69	-67	-65	-63	-61	-59	-57	-55	-53	-51	-49	-47	-45	-43	-41	-39	-37	-35	-33	-31	-29	-27	-25	-23	-21	-19	-17	-15	-13	-11	-9	-7	-5	-3	-1	1	3	5	7
974	-999	-999	-999	-999	0.000200324	0.000195391	0.000185702	0.000186961	0.000184469	0.000176858	0.000186905	0.00018578	0.000180215	0.000179566	0.000169996	0.000204612	0.000172935	0.000176962	0.000174999	0.000184637	0.00018296	0.000192944	0.000200558	0.000217568	0.000235453	0.000241585	0.000226542	0.000216953	0.000252075	0.000149444	0.000193402	0.000333056	0.000311628	0.000217915	0.00022918	0.000180386	0.000150055	0.000411898	0.000627398	0.00110262	0.00210699	0.00510608	0.0091134	0.0256365	0.0265627	0.031912	0.0245979	0.0169094	0.0103113
953	-999	-999	-999	0.000203397	0.000203099	0.000195909	0.000188801	0.000184353	0.000179667	0.000179421	0.000185642	0.000183638	0.000181306	0.000174347	0.000170521	0.000173856	0.000176262	0.000178121	0.000175092	0.000180472	0.000181857	0.000191182	0.000194449	0.000203412	0.000200901	0.000224017	0.000221878	0.000216767	0.000222355	0.000189677	0.000214085	0.000245914	0.000313893	0.00025326	0.000311524	0.000237018	0.000222042	0.000607118	0.000774801	0.000949323	0.00204343	0.00465661	0.00892612	0.0216376	0.0220641	0.0308636	0.025066	0.0230791	0.00911577
929.5	-999	-999	0.000200409	0.000204016	0.000201602	0.000191458	0.000185877	0.000183314	0.000175938	0.000176582	0.000180386	0.00017757	0.0001777	0.00016788	0.00016629	0.000171222	0.000171527	0.000176664	0.000179142	0.000179976	0.000186566	0.000187952	0.000197101	0.000205368	0.000218272	0.000235632	0.000252217	0.000225142	0.000205472	0.000234976	0.000237793	0.00033322	0.000330225	0.000194997	0.000234663	0.000230342	0.000237539	0.000529766	0.000663921	0.000778839	0.00197354	0.0044826	0.00800532	0.0180724	0.0239527	0.026984	0.0262328	0.0178271	0.00803301
903.5	-999	-999	0.00019978	0.0001969	0.00019351	0.000188168	0.000183262	0.0001803	0.000172105	0.00017181	0.000174876	0.000178102	0.000176206	0.000169411	0.000168487	0.000173133	0.000173848	0.000180084	0.000181884	0.000182495	0.000187896	0.000190303	0.000204191	0.000207771	0.000221867	0.000240184	0.000254877	0.000220455	0.000177473	0.000242725	0.000245437	0.000320047	0.000360802	0.000143319	0.000241503	0.000266865	0.000371933	0.000389308	0.000454247	0.000812173	0.00183512	0.00388876	0.00762412	0.0152385	0.0194423	0.0222667	0.0207241	0.0137546	0.00668862
875	-999	-999	0.000196401	0.000194982	0.000189155	0.000184044	0.000179842	0.000177179	0.00017222	0.000175375	0.000174284	0.000181239	0.000177316	0.000173811	0.000171874	0.000176087	0.000179328	0.000182405	0.000188105	0.000189755	0.000195727	0.000199687	0.000206977	0.000209939	0.000233624	0.000255376	0.00026498	0.000231721	0.000188194	0.00026831	0.000217065	0.000305235	0.00026685	7.85142e-05	0.000168487	0.000331193	0.000371873	0.000308558	0.000574246	0.000871509	0.0016695	0.00370973	0.00697407	0.0124679	0.0159685	0.0174214	0.0162485	0.0108906	0.00544751
842.5	-999	-999	0.000194468	0.000195466	0.000188746	0.000184007	0.000178557	0.00017494	0.000173755	0.000177614	0.000177752	0.000182953	0.000179071	0.000176691	0.000176828	0.000179965	0.00018321	0.000185937	0.000193544	0.000200536	0.000208646	0.000213567	0.000216488	0.000220992	0.000232652	0.000260264	0.000258528	0.000246607	0.000192925	0.000213183	0.000293598	0.000283301	0.000247791	0.000116453	0.000227779	0.000366881	0.000405431	0.000273943	0.000624046	0.000883967	0.0015156	0.00331876	0.00600453	0.0098338	0.0125731	0.0134424	0.012558	0.00825825	0.0046213
805	-999	-999	0.000198919	0.000194743	0.000191394	0.000186693	0.000179764	0.000175685	0.000175148	0.000181198	0.000179775	0.000184897	0.000179619	0.000179961	0.000180297	0.000182677	0.000186078	0.000192076	0.000200361	0.000208791	0.000217516	0.000224512	0.000231396	0.000232711	0.000238694	0.000259861	0.000269324	0.000258826	0.000222154	0.00022909	0.000326462	0.000344142	0.000274554	0.000237212	0.000322238	0.0004237	0.00037773	0.000328138	0.000510558	0.000764832	0.00151066	0.00287722	0.00485954	0.00745988	0.00958556	0.0100914	0.00928666	0.00621754	0.00364879
762.5	-999	-999	0.000198089	0.0001969	0.000191934	0.00018692	0.000179555	0.000179715	0.000180922	0.000187051	0.000185188	0.000188202	0.00018556	0.00018578	0.000184327	0.000189837	0.000193994	0.000204474	0.000212274	0.00021841	0.000230704	0.000241607	0.000248861	0.000246722	0.000252314	0.000263683	0.000275448	0.000267468	0.00028909	0.000309281	0.000346355	0.000357695	0.000386626	0.000343487	0.000403449	0.000399977	0.000406697	0.000330314	0.000450343	0.000777662	0.00129198	0.0021334	0.00360452	0.00535771	0.00675993	0.00710613	0.00617088	0.00429548	0.00257474
716	-999	0.000202734	0.000199236	0.000197183	0.000192646	0.000189576	0.000183124	0.000186034	0.000190046	0.000194851	0.000191927	0.000196747	0.000195533	0.000195105	0.000194646	0.000196718	0.000207201	0.000215769	0.000222348	0.000232294	0.000244182	0.000257563	0.000264648	0.000263561	0.000268117	0.000279807	0.000287838	0.000306264	0.000370659	0.000398286	0.000405781	0.000408709	0.000420988	0.000406869	0.000435039	0.00044632	0.000475422	0.000494525	0.000503108	0.000758722	0.00108498	0.00165445	0.00282285	0.00395559	0.0048382	0.00491823	0.00395902	0.00289536	0.00179078
667	0.000203647	0.000203673	0.000201158	0.000199769	0.000195049	0.000192132	0.000192493	0.000192769	0.000198331	0.000202794	0.000200089	0.000205562	0.000203703	0.000202667	0.000202689	0.000207007	0.000216063	0.000225957	0.000237241	0.000249285	0.000257667	0.000272822	0.000284821	0.000288643	0.000294924	0.000307456	0.000320978	0.000358246	0.000410073	0.000426002	0.000431806	0.000448056	0.000499412	0.000505589	0.000498354	0.000560202	0.000575081	0.000667155	0.000751019	0.000967681	0.0011819	0.00158791	0.00241447	0.00336539	0.00397888	0.00371225	0.0028749	0.0021438	0.00148331
616.5	0.000203706	0.000202786	0.000201076	0.000202056	0.000199489	0.000198737	0.00020013	0.000203088	0.000209879	0.000211272	0.000213247	0.000217151	0.000216067	0.000216033	0.000218842	0.000225928	0.000236548	0.000245489	0.000257201	0.000268932	0.000287253	0.000300188	0.000312202	0.000323787	0.000337303	0.000348657	0.000373974	0.000407867	0.000438057	0.000476226	0.000483073	0.00049682	0.000550665	0.000606254	0.000618868	0.00075525	0.000797503	0.000931449	0.000965469	0.00115359	0.0014143	0.00176738	0.00238385	0.00330452	0.00377584	0.00341107	0.00272072	0.00206978	0.00143449
565	0.000206083	0.000208866	0.000205338	0.000205535	0.000204895	0.000204973	0.000207487	0.000215337	0.000223272	0.000225678	0.000230499	0.000231337	0.000229128	0.000234913	0.000244454	0.000252467	0.000261284	0.000271894	0.000283893	0.000302583	0.000324186	0.000330947	0.000337884	0.000358321	0.000384815	0.00039845	0.000423826	0.000461914	0.000480831	0.000508808	0.000544548	0.000555992	0.000608429	0.000704125	0.000800252	0.000957757	0.00108211	0.00115806	0.00126053	0.00148125	0.00175779	0.00198956	0.00254012	0.00340333	0.00385425	0.00348993	0.00284058	0.00225707	0.00161008
514	0.000213291	0.000217181	0.000217069	0.00021448	0.000214573	0.000217475	0.000222813	0.000231873	0.00024185	0.00024664	0.00025415	0.000251174	0.000249159	0.000255991	0.000270393	0.00028595	0.000298437	0.000308387	0.000323649	0.00034295	0.000359498	0.000365689	0.000374347	0.000397436	0.00042206	0.000449538	0.000479184	0.000512838	0.000538684	0.000558652	0.000609949	0.000642836	0.000711016	0.000854895	0.00101303	0.00118369	0.00137527	0.00145859	0.00161174	0.00184663	0.00212403	0.00239232	0.00290689	0.00370882	0.00406136	0.00375399	0.00311189	0.0025304	0.00194724
465	0.000223491	0.00023042	0.000236686	0.000235397	0.00023663	0.000241913	0.000248533	0.000261489	0.000272982	0.000282325	0.000287082	0.000282638	0.000281595	0.000290599	0.000307996	0.000328038	0.000343766	0.000362284	0.000383154	0.000400037	0.000411205	0.000421628	0.000439227	0.000460707	0.000484839	0.000522107	0.000547446	0.000584021	0.000628777	0.000670761	0.00072854	0.000783682	0.000876978	0.00107335	0.00125153	0.00146933	0.00170361	0.0018869	0.00204985	0.00236061	0.00267494	0.00298518	0.00349379	0.00432754	0.00464106	0.00437235	0.00380084	0.00311482	0.00248626
418.5	0.000249751	0.000254877	0.00026527	0.000270318	0.000274848	0.000286773	0.000297964	0.000314921	0.000332724	0.000346687	0.000350092	0.000342328	0.000339303	0.000352494	0.000373065	0.000400521	0.000423089	0.000450924	0.000482202	0.000498638	0.000507079	0.000520773	0.000544682	0.000562303	0.000581875	0.000623628	0.000650376	0.000701062	0.000763863	0.000836551	0.000918567	0.00100073	0.00115507	0.00137641	0.00160712	0.00187556	0.00221455	0.00246026	0.00259538	0.00291841	0.00336005	0.00371644	0.00443581	0.00541708	0.00578958	0.00559951	0.00493181	0.00408837	0.0032469
375	0.000305682	0.000311866	0.000321329	0.000327639	0.000341825	0.000371274	0.000394981	0.000419073	0.000444114	0.000469722	0.000468709	0.000454471	0.000447512	0.000464335	0.000494123	0.000536725	0.000572629	0.000611134	0.000655152	0.000676572	0.000691764	0.000704452	0.000717781	0.000729635	0.000750788	0.000788741	0.000824951	0.000888154	0.000970885	0.00105721	0.00118527	0.00131586	0.00150205	0.00175308	0.00204733	0.00235713	0.0027329	0.00298771	0.00317341	0.00346327	0.00410919	0.00458468	0.00559683	0.00687265	0.00745492	0.0074461	0.00666843	0.00539964	0.00403461
335	0.000461228	0.000463061	0.000479378	0.000483923	0.000520274	0.000584349	0.000625111	0.000665382	0.000708736	0.00074888	0.000736922	0.000720955	0.000722267	0.000767201	0.00083141	0.000904195	0.000961035	0.00101549	0.00106369	0.00109755	0.00110266	0.00110407	0.00109224	0.00109375	0.00109899	0.0011472	0.00122117	0.00128835	0.00139271	0.00150451	0.00168343	0.00186847	0.00209633	0.00236349	0.00271687	0.00301704	0.00332968	0.00356804	0.0036571	0.00391027	0.00461456	0.00527865	0.00660792	0.0083341	0.00907601	0.00930625	0.00855945	0.0068035	0.00483213
299	0.000876218	0.00087975	0.000915289	0.000917211	0.000982605	0.00109964	0.00117289	0.00124982	0.00132947	0.00138147	0.00136356	0.00135946	0.00139363	0.00150384	0.00164436	0.00177237	0.0018595	0.00191842	0.00196831	0.00196487	0.00191435	0.00186452	0.00181568	0.00177385	0.0017821	0.00185229	0.0019502	0.00203516	0.00210194	0.00219637	0.0023282	0.00255427	0.00277533	0.00307474	0.00343767	0.00375399	0.00404336	0.0042979	0.00425224	0.00440711	0.00511318	0.00609958	0.00770636	0.00970696	0.0104606	0.0107961	0.0101598	0.00818908	0.00562993
266.5	0.00203875	0.00204337	0.00207774	0.00208652	0.00220619	0.00241508	0.00255118	0.0026913	0.00280216	0.00287399	0.00288187	0.00295472	0.00307873	0.00330663	0.00358588	0.00380987	0.00391242	0.00396627	0.00399408	0.00391111	0.00377163	0.00361454	0.00346357	0.00337994	0.00338751	0.0034591	0.00354913	0.00358558	0.00351405	0.0034759	0.00347094	0.00352618	0.00365421	0.00391997	0.00427002	0.00468686	0.00498936	0.00510925	0.00510228	0.00517601	0.00597584	0.00711143	0.00896981	0.0111142	0.0119327	0.0122067	0.0113282	0.00905396	0.00626084
237	0.00454292	0.00465029	0.00459546	0.00460163	0.00480148	0.00511414	0.00533172	0.00552967	0.00563079	0.00579545	0.00591022	0.00613615	0.00647068	0.00692362	0.00740242	0.0077759	0.00796723	0.00809246	0.00814825	0.00804067	0.00786048	0.0076018	0.00734794	0.00716275	0.00705621	0.00698933	0.00688732	0.00667867	0.00632688	0.00587994	0.00548208	0.00516188	0.00506669	0.00526899	0.00552371	0.00585267	0.00606373	0.00601715	0.00605059	0.00623855	0.00693491	0.0080696	0.00999203	0.0123682	0.0131007	0.0132855	0.0120627	0.00974153	0.00697866
210	0.00859356	0.00873446	0.00858647	0.00856149	0.00881302	0.00910795	0.00937277	0.00961608	0.00985408	0.0102233	0.0106108	0.0110167	0.0116217	0.0122943	0.0129258	0.0134776	0.013805	0.0140785	0.0142022	0.0141374	0.0138887	0.0134448	0.0130068	0.0126074	0.0121376	0.0117009	0.0111692	0.010601	0.00988585	0.00896457	0.00815332	0.00747696	0.00712398	0.0071314	0.00728029	0.00755399	0.0076313	0.00754112	0.00741091	0.00740048	0.00784707	0.00906482	0.0111584	0.0138714	0.0144729	0.0146039	0.0131447	0.0107033	0.00777239
185	0.0129058	0.0128393	0.0126649	0.0127534	0.0130636	0.0133962	0.0136864	0.0139692	0.01432	0.0147114	0.0151756	0.0156963	0.0162916	0.0170337	0.0178719	0.0185159	0.0189812	0.0194259	0.0196799	0.0195496	0.0192823	0.018782	0.0181713	0.0174916	0.0167469	0.0159614	0.0150694	0.0141687	0.013099	0.0118589	0.0107364	0.00996399	0.00957406	0.00949058	0.0095624	0.00971776	0.00964189	0.00948825	0.00924942	0.0090287	0.00935477	0.0105872	0.0126159	0.0156064	0.0161743	0.0158983	0.0139517	0.0113927	0.00850132
161.5	0.0171826	0.0172164	0.0171865	0.0173528	0.0175625	0.0177979	0.0180275	0.0181563	0.018295	0.0185087	0.0188857	0.0193299	0.0198441	0.020607	0.0214617	0.0221514	0.0228814	0.0234066	0.0234921	0.0231394	0.0226583	0.0220343	0.0211818	0.0204076	0.0194287	0.0182617	0.0169914	0.0157493	0.0146152	0.0134306	0.012372	0.0117747	0.0114602	0.0114356	0.0115623	0.0118681	0.0120277	0.0119205	0.0117133	0.0114845	0.0119484	0.0131246	0.0152296	0.0182947	0.0187998	0.0182143	0.0159922	0.0129551	0.00961238
139	0.0223175	0.0220875	0.021649	0.0215042	0.0215865	0.0216519	0.0216522	0.021566	0.021701	0.0217894	0.0219529	0.0220379	0.0223085	0.0230107	0.0236549	0.0245546	0.0257272	0.0263907	0.0262252	0.0259025	0.025174	0.0240502	0.0228449	0.021446	0.0198875	0.018676	0.0172225	0.0160511	0.0148934	0.0139369	0.0129887	0.0123107	0.0120153	0.012072	0.0122241	0.0127241	0.0133105	0.0135921	0.01346	0.0135478	0.0142945	0.0159528	0.0181819	0.0218065	0.021617	0.0203273	0.0179101	0.0144444	0.0104365
118	0.0243064	0.024708	0.0245577	0.0242353	0.0241325	0.0243632	0.0245282	0.0244644	0.0242478	0.0240312	0.0239316	0.0235306	0.0234386	0.0239649	0.0245985	0.0256895	0.0270922	0.0275894	0.0275747	0.0274006	0.0267524	0.0258102	0.0243444	0.0229568	0.0212308	0.0198803	0.0183806	0.017158	0.0159127	0.0147023	0.0135119	0.0126501	0.0123618	0.0123309	0.0124479	0.0130266	0.0135641	0.0139174	0.01412	0.0143926	0.014963	0.0158825	0.0173011	0.0198305	0.019787	0.0183592	0.0160966	0.0131072	0.0102863
99	0.0175591	0.0173894	0.0171765	0.0173031	0.0176237	0.0179043	0.01783	0.0177364	0.0174679	0.0176618	0.0175837	0.0180888	0.0188323	0.0196131	0.0204855	0.0217044	0.0232224	0.0251496	0.0245984	0.0246773	0.024821	0.0246552	0.0236672	0.0226715	0.0212938	0.020344	0.0196176	0.0188869	0.0176223	0.0164995	0.0153241	0.0143925	0.0136349	0.013077	0.0126708	0.0126851	0.0125788	0.012547	0.0126469	0.0129662	0.0132789	0.0134881	0.0142713	0.0157159	0.0167748	0.0162181	0.0146344	0.0120136	0.0095219
81.5	0.00937945	0.00923985	0.00905609	0.00912142	0.00927341	0.00939441	0.00944507	0.00950652	0.00961113	0.00979781	0.0101002	0.0106103	0.0112202	0.0118938	0.0127156	0.0136381	0.0151966	0.016861	0.0178567	0.0189917	0.0200741	0.021162	0.02209	0.0225673	0.0224847	0.0223683	0.0222336	0.0218832	0.0211123	0.0201886	0.0192732	0.018626	0.0178157	0.0169163	0.0160995	0.0153963	0.014742	0.0144477	0.014318	0.0143988	0.0145128	0.0151782	0.0157118	0.0162178	0.0169185	0.017387	0.0164455	0.0148026	0.0131785
[truncated: 41 more columns]

## Sheet: NOX
hPa \ degN	-89	-87	-85	-83	-81	-79	-77	-75	-73	-71	-69	-67	-65	-63	-61	-59	-57	-55	-53	-51	-49	-47	-45	-43	-41	-39	-37	-35	-33	-31	-29	-27	-25	-23	-21	-19	-17	-15	-13	-11	-9	-7	-5	-3	-1	1	3	5	7
974	-999	-999	-999	-999	-8.80323e-05	-1.62534e-05	1.52327e-05	3.32203e-05	4.65363e-05	5.71664e-05	4.60967e-05	-2.60286e-05	3.51295e-06	3.86089e-05	4.89019e-05	7.70763e-06	5.85131e-05	5.89974e-05	5.67883e-05	5.72093e-05	5.63115e-05	5.39422e-05	4.54038e-05	4.98593e-05	3.78266e-05	-1.39251e-05	4.81345e-05	7.00019e-05	4.46439e-05	8.21389e-05	8.44784e-05	8.54321e-05	9.11914e-05	0.000104636	0.000115387	0.000134118	0.00011804	0.000168283	0.000187222	0.000179227	0.000120707	0.000113066	-0.000315968	-0.00310556	-0.00219981	-0.00263247	-0.00168324	-0.00104883	-0.000521243
953	-999	-999	-999	-6.29053e-05	-3.88734e-05	-6.94394e-06	3.7238e-05	1.53203e-05	2.2985e-05	1.06823e-05	1.67638e-05	3.61316e-05	4.19952e-05	3.99165e-05	4.80674e-05	5.5816e-05	5.72354e-05	5.31822e-05	5.22397e-05	5.33089e-05	5.37019e-05	5.229e-05	4.88311e-05	5.80177e-05	4.63203e-05	2.73325e-05	1.64211e-05	7.30343e-05	4.31426e-05	5.3931e-05	7.59698e-05	7.18199e-05	0.000112262	0.000129502	0.000142876	0.000114828	0.000147991	0.000128604	0.000176784	0.000231434	0.000128347	0.000122402	-0.000286236	-0.00182864	-0.00130529	-0.00241539	-0.00188129	-0.00225203	-0.000333369
929.5	-999	-999	-0.000190809	-6.8251e-05	-3.44925e-05	1.16657e-05	-7.69831e-06	1.40816e-05	8.32975e-06	2.03457e-05	1.81012e-05	3.65041e-05	3.74243e-05	4.03225e-05	4.60446e-05	4.85294e-05	5.03175e-05	4.77768e-05	4.96283e-05	5.27017e-05	5.17685e-05	5.07776e-05	5.10626e-05	5.82039e-05	5.86063e-05	5.73248e-05	7.21999e-05	8.06302e-05	5.82561e-05	7.87638e-05	9.00887e-05	8.09506e-05	9.06698e-05	0.00011209	0.000130996	0.000124339	7.02105e-05	7.08029e-05	0.000149835	0.000143584	0.000125054	0.000117369	-0.000195086	-0.00105712	-0.00138266	-0.00157725	-0.00208896	-0.00109789	-0.000106849
903.5	-999	-999	-0.000186685	-7.43978e-05	-6.15306e-05	-1.2815e-05	-3.241e-07	3.40305e-06	1.78907e-05	2.16234e-05	2.27559e-05	4.20995e-05	3.58745e-05	4.0099e-05	4.88237e-05	4.62644e-05	4.97438e-05	4.73298e-05	5.02504e-05	5.69839e-05	5.06397e-05	5.14779e-05	5.343e-05	5.98542e-05	6.46301e-05	6.33076e-05	6.44401e-05	6.31474e-05	6.53118e-05	7.26059e-05	8.90158e-05	7.30902e-05	8.07196e-05	0.000158451	0.000117876	0.000112545	7.94493e-05	7.28592e-05	0.000138558	0.00017054	0.000154309	0.00010569	-0.000139453	-0.000734445	-0.000813968	-0.00101629	-0.00122924	-0.000616841	-7.63759e-05
875	-999	-999	-0.000109982	-8.59424e-05	-2.63695e-05	-1.46721e-05	-5.58235e-06	-1.41375e-06	2.27243e-05	1.17794e-05	2.42591e-05	3.82625e-05	3.78489e-05	3.74392e-05	4.80376e-05	4.60967e-05	5.04628e-05	5.06006e-05	5.29774e-05	5.72633e-05	5.43278e-05	5.93662e-05	6.07241e-05	6.26463e-05	6.53453e-05	5.50151e-05	6.08042e-05	4.42453e-05	6.77966e-05	7.708e-05	7.95126e-05	7.36453e-05	0.000108127	0.000104897	0.00013008	9.70103e-05	0.000118319	0.000157598	0.000171226	0.000231907	0.000116248	0.00014789	1.09933e-05	-0.000484541	-0.000564292	-0.000664983	-0.00077736	-0.000472136	-1.91629e-05
842.5	-999	-999	-4.33996e-05	-8.9068e-05	-1.35023e-05	-5.28432e-06	-2.91318e-06	-1.50502e-06	1.43219e-05	7.64802e-06	2.8586e-05	3.53567e-05	4.03486e-05	3.70368e-05	4.23118e-05	4.27999e-05	4.87678e-05	5.23925e-05	5.46463e-05	5.61737e-05	5.89602e-05	6.41942e-05	6.59395e-05	6.27469e-05	6.43563e-05	5.77196e-05	6.79828e-05	6.42352e-05	6.91153e-05	8.92319e-05	9.18396e-05	8.93474e-05	7.97361e-05	0.00010477	0.000142466	0.000118621	0.000136528	0.000157021	0.00017906	0.000246517	0.00017469	0.000181839	0.000115767	-0.000248697	-0.000293631	-0.000392277	-0.000549223	-0.00022728	7.91699e-05
805	-999	-999	-4.25391e-05	-5.02095e-05	-2.17892e-05	-3.4254e-06	-1.42846e-05	-1.13621e-07	1.95075e-05	1.53519e-05	2.98433e-05	2.85804e-05	3.52003e-05	3.71784e-05	3.93912e-05	4.69796e-05	5.00232e-05	5.47282e-05	5.7172e-05	5.64046e-05	6.33337e-05	6.23092e-05	6.66417e-05	6.70925e-05	6.42315e-05	5.85318e-05	6.89998e-05	7.3351e-05	7.51019e-05	7.55861e-05	9.63286e-05	0.000196908	0.000108667	0.000129621	0.000148077	0.000158723	0.000176903	0.000198208	0.000208464	0.000275105	0.000292286	0.00033034	0.000271477	6.66827e-06	-2.93031e-05	-0.000107307	-0.000254512	-0.000108656	0.000166826
762.5	-999	-999	-3.22759e-05	-5.99697e-05	-6.83777e-06	1.00583e-05	-5.97909e-07	2.54251e-06	1.49552e-05	1.05891e-05	1.54451e-05	2.11671e-05	2.7515e-05	2.96161e-05	3.7536e-05	4.22075e-05	4.95017e-05	5.27911e-05	5.72391e-05	5.78351e-05	6.31884e-05	5.84498e-05	6.33448e-05	6.85155e-05	6.17802e-05	5.88e-05	6.75097e-05	7.96728e-05	8.50074e-05	8.91276e-05	8.67136e-05	6.58371e-05	0.000129841	0.000159297	0.000175856	0.000209216	0.0002391	0.000287395	0.000300158	0.000322621	0.000365432	0.000421256	0.000412147	0.000252981	0.000211537	0.000142459	5.36665e-05	7.75643e-05	0.000227775
716	-999	-0.000104785	-1.23642e-05	-5.00921e-05	-3.25385e-05	-1.05351e-05	1.89431e-06	-9.23127e-06	-3.94322e-06	-3.42727e-07	7.44686e-06	1.3534e-05	2.32346e-05	2.39909e-05	3.10801e-05	3.62508e-05	4.47035e-05	4.89652e-05	5.20274e-05	5.62109e-05	5.87329e-05	5.5328e-05	5.93401e-05	6.3803e-05	5.77495e-05	6.01001e-05	7.05011e-05	8.24891e-05	8.4132e-05	9.14931e-05	0.000102136	0.000118274	0.000137009	0.000174113	0.000207596	0.000253804	0.000298522	0.000353333	0.000371713	0.00041138	0.000462152	0.000505198	0.000527475	0.000424955	0.00039351	0.00033547	0.000262409	0.000264995	0.000296395
667	-0.00015334	-4.83021e-05	-6.72042e-06	-6.20242e-05	-3.88641e-05	-9.54047e-06	-1.44653e-05	-1.8144e-05	-1.50781e-05	-1.05016e-05	1.50129e-06	2.39164e-06	1.24872e-05	1.47372e-05	1.96397e-05	2.89045e-05	3.51481e-05	4.06355e-05	4.08627e-05	5.10141e-05	4.7598e-05	5.05336e-05	5.60395e-05	5.86361e-05	5.8651e-05	6.43618e-05	6.80983e-05	8.20942e-05	8.40686e-05	9.87127e-05	0.000104871	0.000125218	0.000146106	0.000187848	0.000231881	0.000293724	0.000350185	0.00040438	0.000442639	0.00048165	0.000522599	0.000568252	0.000572145	0.000499353	0.000477128	0.000430934	0.000363015	0.00034377	0.000366922
616.5	-7.11083e-05	-3.70294e-05	-3.72715e-05	-6.24601e-05	-3.31476e-05	-4.52027e-05	-3.09646e-05	-3.07709e-05	-1.61491e-05	-2.11895e-05	-2.13012e-05	-1.49868e-05	-5.7444e-06	-1.16602e-06	1.8701e-06	7.56979e-06	1.72108e-05	2.69264e-05	3.07783e-05	3.57181e-05	3.83444e-05	4.6663e-05	4.6242e-05	4.88348e-05	5.85169e-05	6.66864e-05	6.86683e-05	8.19042e-05	8.85874e-05	0.000106677	0.000117145	0.000135664	0.000164934	0.00020976	0.000265162	0.000321813	0.000383392	0.000445127	0.000477508	0.000509232	0.000529502	0.000564829	0.000559431	0.000491813	0.000486918	0.000451155	0.000406239	0.000378758	0.00039465
565	-4.79706e-05	-3.78657e-05	-3.53754e-05	-3.54387e-05	-3.03984e-05	-3.46117e-05	-3.00612e-05	-3.63737e-05	-4.24869e-05	-4.69536e-05	-4.93713e-05	-3.79011e-05	-2.88151e-05	-2.21245e-05	-2.02395e-05	-1.73263e-05	-1.15223e-05	-2.52575e-06	2.99513e-06	8.02428e-06	1.53594e-05	2.45571e-05	2.56598e-05	3.03611e-05	4.77917e-05	6.10985e-05	6.76438e-05	7.8395e-05	9.54308e-05	0.000105169	0.000125661	0.000150364	0.000183124	0.000232648	0.0002876	0.000343725	0.000399258	0.00045092	0.000477053	0.000498012	0.000501242	0.000525568	0.000515703	0.000441037	0.000439622	0.000413287	0.000388872	0.000356209	0.000391945
514	-2.20761e-05	-3.42578e-05	-3.27565e-05	-3.78974e-05	-3.37288e-05	-5.7295e-05	-6.10165e-05	-7.0788e-05	-8.07084e-05	-9.59039e-05	-8.88035e-05	-7.43009e-05	-6.16573e-05	-6.61127e-05	-6.53826e-05	-6.39372e-05	-5.05559e-05	-4.22075e-05	-3.9231e-05	-3.60385e-05	-2.8681e-05	-1.61715e-05	-4.19095e-06	3.44962e-06	1.9066e-05	3.66122e-05	5.28805e-05	6.87204e-05	9.05842e-05	0.00010094	0.000130385	0.000166692	0.000204362	0.000260148	0.000314437	0.000367679	0.00041461	0.000462301	0.000480086	0.000495892	0.000485402	0.000498969	0.00049603	0.00041306	0.000408467	0.000398505	0.000387561	0.000348274	0.000398446
465	-3.97302e-05	-5.66393e-05	-6.90259e-05	-6.51777e-05	-7.1831e-05	-0.000107028	-0.000112906	-0.000117783	-0.000156336	-0.000172697	-0.0001579	-0.000142999	-0.000122294	-0.000137724	-0.000146218	-0.000140898	-0.00013005	-0.000124276	-0.000115804	-0.000111893	-9.89661e-05	-8.07382e-05	-5.84796e-05	-3.27416e-05	-2.18861e-05	1.9744e-07	1.83955e-05	3.1963e-05	5.48996e-05	7.47256e-05	0.000108033	0.000154763	0.000207521	0.000278074	0.000335593	0.000388335	0.000435237	0.000482064	0.000489533	0.000503808	0.000483073	0.000471216	0.00045231	0.000369318	0.000348359	0.000345599	0.000348661	0.000327881	0.000398818
418.5	-9.01595e-05	-8.95262e-05	-0.000123136	-0.000135116	-0.000149995	-0.000182286	-0.000222139	-0.000251845	-0.000289068	-0.00030145	-0.000283606	-0.000276424	-0.000261717	-0.000273935	-0.000289686	-0.000296451	-0.000276968	-0.000269771	-0.000257611	-0.000232786	-0.000204422	-0.000168107	-0.000139363	-9.91672e-05	-8.22507e-05	-6.16424e-05	-4.54187e-05	-3.2898e-05	-1.17943e-05	1.50092e-05	4.86411e-05	0.000109695	0.000181418	0.000270259	0.000324901	0.000382334	0.000431169	0.000479739	0.000482533	0.000497624	0.000434559	0.000410859	0.000337593	0.000204366	0.000184473	0.000186767	0.000202533	0.000220295	0.000340961
375	-8.9258e-05	-0.000191435	-0.000278205	-0.000298783	-0.000332147	-0.0003957	-0.000457942	-0.000517279	-0.000537202	-0.000547275	-0.000528902	-0.000544563	-0.000531003	-0.000547633	-0.000570968	-0.000566229	-0.000556722	-0.000541896	-0.000497565	-0.000443742	-0.000386804	-0.000332527	-0.000284985	-0.000235304	-0.000206433	-0.00018315	-0.000172175	-0.000150599	-0.000132009	-0.000108406	-6.45071e-05	2.37674e-06	7.75009e-05	0.000180192	0.000229441	0.000288785	0.000329264	0.000383928	0.00037048	0.000378311	0.000252992	0.00022611	7.7419e-05	-0.000158414	-0.000187524	-0.000201341	-0.000184141	-0.000101998	0.000162825
335	-0.000188291	-0.000536382	-0.000655711	-0.000682235	-0.000725985	-0.000838637	-0.000922948	-0.000990927	-0.0010345	-0.00102133	-0.00102216	-0.00105184	-0.0010539	-0.00108188	-0.00113985	-0.00112894	-0.00108242	-0.00101674	-0.00093323	-0.000825971	-0.000730768	-0.000644937	-0.000575691	-0.000490546	-0.000442028	-0.000429407	-0.00040663	-0.000398442	-0.000389561	-0.000367343	-0.000310414	-0.000229612	-0.000114143	2.42814e-05	7.37086e-05	0.000105508	0.000102229	0.000147298	0.000115298	0.000105672	-9.4384e-05	-0.000156231	-0.000353903	-0.000805661	-0.000838205	-0.000906192	-0.000918269	-0.000778481	-0.000199512
299	-0.00109792	-0.00139266	-0.00140977	-0.00146347	-0.00156403	-0.0016908	-0.0017463	-0.00174499	-0.001737	-0.00176769	-0.00178874	-0.00190955	-0.00192767	-0.00193554	-0.00191671	-0.00182039	-0.00171757	-0.001636	-0.00151253	-0.00135997	-0.00121823	-0.00109485	-0.000986382	-0.000883788	-0.000804856	-0.000782475	-0.000777379	-0.000774756	-0.000763237	-0.000736907	-0.000658855	-0.00052546	-0.000361457	-0.000218228	-0.000188589	-0.00021299	-0.000208542	-0.000208646	-0.00025674	-0.00029368	-0.000537097	-0.000688434	-0.00104484	-0.00179005	-0.00186262	-0.00198757	-0.00201023	-0.00178201	-0.00079143
266.5	-0.00275576	-0.0024488	-0.00259805	-0.00271571	-0.00284016	-0.00292099	-0.00290585	-0.00286496	-0.00282371	-0.0028764	-0.00299019	-0.00311029	-0.00306123	-0.00305682	-0.00292385	-0.002801	-0.00267994	-0.0025894	-0.00244504	-0.00227666	-0.00209531	-0.00191802	-0.00176683	-0.00161621	-0.00150913	-0.00148463	-0.0015012	-0.00150961	-0.00150645	-0.00144482	-0.00128418	-0.00109988	-0.000904828	-0.000755012	-0.000737175	-0.000804931	-0.00072971	-0.000732139	-0.000788152	-0.000842512	-0.00113998	-0.00145537	-0.00206433	-0.00310507	-0.00321849	-0.00339391	-0.00335447	-0.00287512	-0.00156904
237	-0.00310445	-0.00384176	-0.00433934	-0.00445449	-0.00449276	-0.00458479	-0.00453162	-0.00433576	-0.00423265	-0.00424612	-0.0043174	-0.00436437	-0.00433445	-0.00422049	-0.00413752	-0.00407946	-0.00401056	-0.00397927	-0.00388712	-0.00380576	-0.00364995	-0.00346357	-0.00330448	-0.00312495	-0.00301808	-0.00299984	-0.00300473	-0.00305259	-0.00310123	-0.00294083	-0.00270173	-0.00242642	-0.00208452	-0.00178912	-0.00173023	-0.00180069	-0.00167711	-0.00157334	-0.00158103	-0.0015645	-0.00183256	-0.0023732	-0.00323595	-0.00451487	-0.00470228	-0.00479682	-0.00459495	-0.00388514	-0.00242174
210	-0.00276017	-0.00550961	-0.00610733	-0.00610161	-0.00597095	-0.00594544	-0.00600994	-0.00577354	-0.00552738	-0.00543022	-0.00544262	-0.00538552	-0.00534856	-0.00530159	-0.00525975	-0.00535798	-0.00551617	-0.00568187	-0.00575781	-0.00580215	-0.00577283	-0.00566721	-0.00557148	-0.0054298	-0.00531119	-0.00531358	-0.00530767	-0.00542587	-0.00555718	-0.00549406	-0.0051654	-0.00462866	-0.00405216	-0.00353724	-0.00334495	-0.00328851	-0.00304964	-0.00284851	-0.00264278	-0.00251532	-0.00266108	-0.00335042	-0.00446989	-0.00606546	-0.00608854	-0.00615552	-0.00586829	-0.0049416	-0.00324462
185	-0.00105357	-0.00578427	-0.00638175	-0.00599456	-0.00589681	-0.00586748	-0.00605917	-0.00617456	-0.00608373	-0.00582194	-0.00581431	-0.005826	-0.00580263	-0.00581181	-0.00604212	-0.00635409	-0.00676382	-0.00716043	-0.00744927	-0.00767398	-0.00789976	-0.00801682	-0.00804782	-0.00807846	-0.00810504	-0.00823426	-0.00831616	-0.00855637	-0.00866127	-0.00855553	-0.00818837	-0.00762355	-0.00700486	-0.00648826	-0.00615782	-0.0058217	-0.00540447	-0.00475246	-0.00421631	-0.00382739	-0.00400841	-0.00474393	-0.00578648	-0.00741324	-0.00737888	-0.00730956	-0.00681412	-0.00550646	-0.00379488
161.5	-0.00521111	-0.00557899	-0.00579238	-0.00545335	-0.0055809	-0.00573015	-0.00571072	-0.0056349	-0.00579321	-0.00585163	-0.00592673	-0.00602734	-0.00601196	-0.00613451	-0.00651658	-0.00692618	-0.00752902	-0.00807726	-0.00844669	-0.00879824	-0.0091511	-0.00947034	-0.00959039	-0.00997651	-0.0102738	-0.0105791	-0.0108378	-0.0111552	-0.0113883	-0.0114988	-0.0114815	-0.0113351	-0.0108417	-0.0100378	-0.00968969	-0.00943542	-0.00897002	-0.00828552	-0.0077998	-0.00740457	-0.0069207	-0.00716993	-0.00786304	-0.00907096	-0.00883096	-0.0088644	-0.00823545	-0.0066579	-0.00455236
139	-0.00728798	-0.00683188	-0.0066371	-0.00648248	-0.0060246	-0.00574708	-0.00570095	-0.00569212	-0.00602722	-0.00639594	-0.00655103	-0.00659847	-0.00664842	-0.00676203	-0.00683665	-0.00711036	-0.00793517	-0.00893152	-0.00857604	-0.00915217	-0.00880611	-0.00900769	-0.00953555	-0.00992024	-0.0102452	-0.0108277	-0.0111735	-0.0118179	-0.012393	-0.0129972	-0.0132847	-0.0135317	-0.0135231	-0.0130631	-0.0125374	-0.012199	-0.0120468	-0.012061	-0.0121057	-0.0116638	-0.0108435	-0.0107817	-0.0104126	-0.0111936	-0.0101594	-0.010166	-0.009702	-0.00751227	-0.00467065
118	-0.00296295	-0.0032202	-0.00332713	-0.00335205	-0.00371051	-0.00474548	-0.00484502	-0.00354481	-0.005018	-0.0066638	-0.0075444	-0.00791645	-0.00819576	-0.00858581	-0.00952792	-0.0109711	-0.00963938	-0.00885546	-0.00797319	-0.00799787	-0.00794101	-0.00821257	-0.00840795	-0.0087961	-0.00909686	-0.009583	-0.00991821	-0.0106318	-0.0113354	-0.0120726	-0.0127995	-0.0134459	-0.0143199	-0.0148094	-0.0146732	-0.0147595	-0.0148168	-0.0145968	-0.0148413	-0.0147432	-0.0142591	-0.0137763	-0.0130669	-0.0126027	-0.0118347	-0.0109273	-0.00969279	-0.0077374	-0.00547022
99	-0.0016191	-0.00454473	0.00128818	-0.00184143	-0.0017013	-0.00239605	-0.00662947	-0.00739229	-0.00570005	-0.00682724	-0.00620443	-0.00605273	-0.0076912	-0.00667745	-0.00577486	-0.0102091	-0.0100746	-0.00882423	-0.00844347	-0.00587106	-0.00621843	-0.00706124	-0.00707185	-0.00738096	-0.00783253	-0.00832868	-0.00893307	-0.00977588	-0.0102706	-0.0110452	-0.0117939	-0.0127826	-0.0139141	-0.0148137	-0.0151703	-0.0154414	-0.0153937	-0.015245	-0.0151107	-0.0160015	-0.0166167	-0.0155075	-0.0144409	-0.0146557	-0.0152929	-0.0141969	-0.0129	-0.0108701	-0.00857556
81.5	0.00420761	-0.00282937	0.0011453	-0.000375748	-0.00484341	-0.00950468	-0.00639537	-0.00288668	-0.00191841	-0.0042069	-0.00341982	-0.00127327	-0.00346971	-0.0103205	-0.0133014	-0.00654054	-0.00614035	-0.00596583	-0.00493014	-0.00397027	-0.0035851	-0.00303066	-0.00455952	-0.00391436	-0.00439095	-0.00522113	-0.00596428	-0.00683689	-0.00750303	-0.0082798	-0.00914717	-0.0101023	-0.0110595	-0.0119085	-0.0126104	-0.0133352	-0.0138872	-0.0143392	-0.0150311	-0.0159283	-0.0167372	-0.0166984	-0.0167298	-0.016758	-0.0166991	-0.0165598	-0.0154326	-0.0135431	-0.011997
[truncated: 41 more columns]

## Sheet: HOX
hPa \ degN	-89	-87	-85	-83	-81	-79	-77	-75	-73	-71	-69	-67	-65	-63	-61	-59	-57	-55	-53	-51	-49	-47	-45	-43	-41	-39	-37	-35	-33	-31	-29	-27	-25	-23	-21	-19	-17	-15	-13	-11	-9	-7	-5	-3	-1	1	3	5	7
974	-999	-999	-999	-999	-6.48317e-06	-2.92482e-06	1.70199e-07	-8.81264e-07	-9.94187e-08	1.01281e-07	6.24103e-07	-2.39466e-07	7.90926e-07	1.07556e-06	1.38348e-06	-6.794e-07	1.65729e-06	1.81026e-06	2.12784e-06	1.84472e-06	1.35694e-06	1.55694e-06	3.08035e-06	2.60305e-06	3.10922e-06	2.25008e-06	2.23285e-06	3.48734e-06	2.90107e-06	1.85985e-06	1.28802e-06	2.15415e-06	4.42937e-06	4.02611e-06	6.07222e-06	4.85592e-06	8.28784e-06	1.24862e-05	1.49934e-05	1.89431e-05	2.47564e-05	2.6485e-05	2.43913e-05	6.1675e-05	4.97401e-05	5.37932e-05	3.59491e-05	2.98452e-05	2.08113e-05
953	-999	-999	-999	-6.7337e-06	-3.60142e-06	-1.48942e-06	-4.91738e-07	9.28296e-07	6.7777e-07	9.07108e-07	9.45758e-07	5.26197e-07	1.05915e-06	1.76439e-06	1.12457e-06	1.0056e-06	2.18884e-06	2.15252e-06	2.45217e-06	2.05799e-06	1.72714e-06	1.50409e-06	3.22564e-06	2.86382e-06	3.23029e-06	2.11969e-06	2.14437e-06	3.2424e-06	3.36114e-06	2.71294e-06	1.97813e-06	1.79512e-06	4.31575e-06	3.51295e-06	6.45407e-06	4.92763e-06	8.21985e-06	1.24387e-05	1.38264e-05	1.82278e-05	2.49315e-05	2.4233e-05	2.28621e-05	5.58021e-05	4.55026e-05	5.98058e-05	4.61955e-05	4.48599e-05	1.89254e-05
929.5	-999	-999	-7.1968e-06	-1.04238e-06	4.42611e-07	1.30502e-06	1.42772e-06	6.48433e-07	7.52276e-07	1.71131e-06	9.52743e-07	8.60309e-07	1.11363e-06	2.43657e-06	2.03052e-06	1.72877e-06	2.00723e-06	2.53157e-06	3.33111e-06	2.3921e-06	2.12458e-06	1.16997e-06	2.2687e-06	2.19047e-06	2.99979e-06	1.98325e-06	1.98744e-06	3.14089e-06	3.45241e-06	2.6999e-06	2.13413e-06	2.26777e-06	3.98513e-06	2.96347e-06	6.70739e-06	5.19771e-06	9.6513e-06	1.37622e-05	1.42679e-05	1.83629e-05	2.36258e-05	2.55862e-05	2.24812e-05	4.74025e-05	4.56646e-05	5.09797e-05	5.5044e-05	3.82988e-05	1.73477e-05
903.5	-999	-999	-5.77956e-06	2.08151e-07	1.86078e-06	2.21725e-06	1.18255e-06	1.73808e-06	1.4999e-06	2.09408e-06	1.26543e-06	1.42981e-06	1.15274e-06	2.30013e-06	1.78022e-06	1.56439e-06	2.04635e-06	2.47825e-06	3.16463e-06	1.99256e-06	2.16137e-06	9.85805e-07	1.82772e-06	2.05683e-06	2.50665e-06	2.01492e-06	2.16672e-06	3.51109e-06	3.64147e-06	2.08849e-06	2.73855e-06	1.52178e-06	3.62471e-06	2.8573e-06	6.10109e-06	6.2827e-06	9.53209e-06	1.43666e-05	1.45482e-05	1.90223e-05	2.22633e-05	2.59141e-05	2.19578e-05	4.07724e-05	3.92385e-05	4.09596e-05	4.51505e-05	2.99737e-05	1.65468e-05
875	-999	-999	-1.31852e-06	6.97328e-07	6.74045e-07	2.0552e-06	1.39349e-06	1.69314e-06	1.47684e-06	1.61841e-06	1.21724e-06	1.22353e-06	7.74628e-07	2.16044e-06	1.98185e-06	1.55298e-06	1.99047e-06	2.44449e-06	2.99397e-06	1.87242e-06	1.97417e-06	7.44127e-07	1.94926e-06	1.96276e-06	2.28547e-06	2.2715e-06	2.41166e-06	3.80585e-06	3.95812e-06	1.71643e-06	2.78978e-06	-5.30854e-08	3.98885e-06	3.8892e-06	5.8189e-06	7.68155e-06	1.01645e-05	1.55326e-05	1.52336e-05	1.92244e-05	2.13897e-05	2.82079e-05	2.20342e-05	3.37651e-05	3.27891e-05	3.016e-05	3.55011e-05	2.62074e-05	1.45724e-05
842.5	-999	-999	-2.03727e-07	-4.5402e-08	6.33067e-07	1.73389e-06	1.2212e-06	1.18534e-06	1.52527e-06	1.60537e-06	1.20653e-06	1.2659e-06	9.262e-07	1.86032e-06	2.07848e-06	1.67452e-06	1.7595e-06	2.27103e-06	2.76463e-06	2.01096e-06	1.88616e-06	1.12318e-06	2.28686e-06	2.51923e-06	2.87034e-06	2.45729e-06	2.54763e-06	3.53064e-06	4.09968e-06	2.6268e-06	2.94205e-06	-1.80677e-07	3.19257e-06	4.30737e-06	7.24476e-06	9.58331e-06	1.10576e-05	1.55894e-05	1.62534e-05	1.97794e-05	2.19056e-05	2.9875e-05	2.29906e-05	3.039e-05	2.92212e-05	2.5928e-05	3.00156e-05	2.3501e-05	1.49412e-05
805	-999	-999	-7.76723e-07	9.49949e-08	7.3621e-07	1.11898e-06	1.24448e-06	1.23074e-06	1.51503e-06	1.46031e-06	1.24704e-06	1.53133e-06	1.16369e-06	1.65589e-06	2.10735e-06	1.56183e-06	1.86427e-06	2.3602e-06	2.60025e-06	2.16556e-06	1.86008e-06	1.87149e-06	2.86382e-06	2.76929e-06	3.13763e-06	2.67336e-06	2.40933e-06	3.5814e-06	3.69782e-06	3.4431e-06	4.52064e-06	2.01911e-06	2.38512e-06	5.52926e-06	9.53116e-06	1.19889e-05	1.25924e-05	1.69156e-05	1.90334e-05	2.26824e-05	2.64449e-05	3.20906e-05	2.48896e-05	3.1421e-05	2.88151e-05	2.67494e-05	2.81716e-05	2.42749e-05	1.62786e-05
762.5	-999	-999	-5.88829e-07	8.07922e-08	3.40398e-07	8.07457e-07	9.27364e-07	1.34367e-06	1.10664e-06	1.23214e-06	1.11456e-06	1.56881e-06	1.28336e-06	1.74274e-06	1.91177e-06	1.62935e-06	1.91689e-06	2.69269e-06	2.6084e-06	2.21538e-06	2.12295e-06	2.51969e-06	3.58419e-06	2.91131e-06	3.39188e-06	3.09153e-06	2.57278e-06	3.47802e-06	3.75463e-06	4.26732e-06	5.32344e-06	4.32413e-06	3.74205e-06	8.09319e-06	1.09803e-05	1.41514e-05	1.6273e-05	1.94721e-05	2.18144e-05	2.71024e-05	3.10708e-05	3.33618e-05	2.83029e-05	3.47253e-05	3.10624e-05	3.02186e-05	2.75113e-05	2.62037e-05	1.89114e-05
716	-999	2.72412e-07	-4.37023e-07	3.56231e-07	2.56579e-07	1.18837e-06	8.54954e-07	1.72132e-06	1.02655e-06	1.26869e-06	1.28197e-06	1.33342e-06	1.08918e-06	1.36043e-06	1.65962e-06	1.58534e-06	1.87429e-06	2.40328e-06	2.69781e-06	2.4871e-06	2.57231e-06	3.06778e-06	4.38094e-06	3.2871e-06	3.93065e-06	3.91621e-06	3.65358e-06	3.51761e-06	4.85079e-06	6.19516e-06	5.71506e-06	5.83846e-06	6.0061e-06	9.70531e-06	1.1378e-05	1.7371e-05	1.90055e-05	2.17948e-05	2.49185e-05	2.88533e-05	3.19742e-05	3.34475e-05	3.14349e-05	3.73777e-05	3.44859e-05	3.31942e-05	2.73576e-05	2.7406e-05	2.15238e-05
667	-1.69966e-06	-2.03261e-07	-3.4715e-07	4.08385e-07	6.38654e-07	1.53319e-06	1.49757e-06	1.43424e-06	1.4808e-06	1.3453e-06	1.11759e-06	1.25705e-06	1.31712e-06	1.54506e-06	1.78721e-06	1.96253e-06	1.9311e-06	2.36649e-06	2.6687e-06	2.97814e-06	2.85171e-06	3.61633e-06	4.92949e-06	3.83053e-06	4.59002e-06	4.7884e-06	5.07571e-06	4.49084e-06	6.1607e-06	7.66898e-06	6.61518e-06	8.20961e-06	8.63709e-06	1.12131e-05	1.27191e-05	1.95941e-05	1.94507e-05	2.25594e-05	2.78037e-05	2.85786e-05	2.97027e-05	3.10587e-05	3.10438e-05	3.69977e-05	3.53111e-05	3.2614e-05	2.59001e-05	2.68705e-05	2.13999e-05
616.5	2.91038e-07	-2.33529e-07	-1.86265e-09	4.57978e-07	6.81728e-07	1.67615e-06	2.01073e-06	1.70455e-06	1.66381e-06	1.44797e-06	1.50059e-06	1.53645e-06	1.59233e-06	1.67638e-06	2.09804e-06	2.21957e-06	2.15974e-06	2.45799e-06	2.87476e-06	3.43146e-06	3.31318e-06	4.20865e-06	5.35883e-06	4.64683e-06	5.27641e-06	5.92181e-06	6.12205e-06	5.62007e-06	7.34255e-06	8.81078e-06	7.58143e-06	1.07195e-05	1.02101e-05	1.34232e-05	1.50781e-05	2.08141e-05	1.83592e-05	2.26833e-05	2.78028e-05	2.68593e-05	2.75057e-05	2.94801e-05	2.95667e-05	3.57553e-05	3.39178e-05	3.02251e-05	2.39303e-05	2.65492e-05	1.96965e-05
565	4.26546e-07	9.56934e-08	3.40631e-07	5.20376e-07	7.79983e-07	1.92737e-06	2.14041e-06	2.02679e-06	1.96765e-06	2.05729e-06	1.76951e-06	1.64029e-06	1.72178e-06	1.96276e-06	2.3949e-06	2.30712e-06	2.51969e-06	2.71085e-06	3.39071e-06	4.11272e-06	4.10294e-06	4.79771e-06	5.71553e-06	5.37653e-06	6.10063e-06	6.88573e-06	6.92951e-06	6.93928e-06	8.59657e-06	1.01379e-05	9.09483e-06	1.32918e-05	1.26418e-05	1.53333e-05	1.62171e-05	2.04472e-05	1.80919e-05	2.32439e-05	2.63304e-05	2.63005e-05	2.71061e-05	2.80561e-05	2.67634e-05	3.3211e-05	3.28422e-05	2.95052e-05	2.35243e-05	2.67299e-05	2.01128e-05
514	2.32365e-07	3.91621e-07	7.89529e-07	1.00536e-06	1.37417e-06	2.49571e-06	2.63704e-06	2.5488e-06	2.43098e-06	2.4871e-06	2.302e-06	2.04728e-06	2.12318e-06	2.38023e-06	2.66265e-06	2.77674e-06	3.06778e-06	3.19025e-06	3.81516e-06	4.32483e-06	4.43612e-06	5.04963e-06	5.86966e-06	5.6955e-06	6.51972e-06	7.33836e-06	7.41193e-06	8.23475e-06	1.03074e-05	1.15451e-05	1.076e-05	1.54111e-05	1.4862e-05	1.69398e-05	1.61268e-05	1.96323e-05	1.88611e-05	2.22642e-05	2.42777e-05	2.51075e-05	2.48216e-05	2.52733e-05	2.29832e-05	2.84705e-05	2.92668e-05	2.78605e-05	2.285e-05	2.58898e-05	2.05999e-05
465	3.48082e-07	8.24686e-07	9.76725e-07	1.37766e-06	1.73226e-06	3.18582e-06	3.22633e-06	3.09921e-06	2.98745e-06	2.8729e-06	2.66731e-06	2.40421e-06	2.47266e-06	2.82191e-06	3.13669e-06	3.29223e-06	3.59118e-06	3.73647e-06	4.31063e-06	4.89596e-06	5.12903e-06	5.56232e-06	6.07362e-06	6.21611e-06	6.97654e-06	7.92462e-06	8.19284e-06	9.37562e-06	1.12853e-05	1.22194e-05	1.21077e-05	1.6205e-05	1.60425e-05	1.71326e-05	1.59824e-05	1.96751e-05	1.8388e-05	2.05766e-05	2.24113e-05	2.3989e-05	2.39927e-05	2.57157e-05	2.32309e-05	2.68109e-05	2.95583e-05	2.7216e-05	2.15396e-05	2.57576e-05	1.99545e-05
418.5	6.47502e-07	1.41351e-06	1.34553e-06	1.67056e-06	1.87755e-06	3.74205e-06	3.78629e-06	3.70538e-06	3.41283e-06	3.26801e-06	3.02843e-06	3.13949e-06	3.38047e-06	3.65474e-06	4.09363e-06	4.16627e-06	4.29153e-06	4.42425e-06	4.89899e-06	5.37559e-06	5.70295e-06	6.05243e-06	6.55279e-06	7.14837e-06	7.94558e-06	8.42195e-06	8.72556e-06	1.01365e-05	1.1947e-05	1.27805e-05	1.33435e-05	1.65869e-05	1.6212e-05	1.64299e-05	1.63866e-05	1.97096e-05	1.85752e-05	1.87801e-05	2.03857e-05	2.28891e-05	2.44994e-05	2.52426e-05	2.4477e-05	2.90684e-05	3.10959e-05	2.91271e-05	2.18935e-05	2.62419e-05	2.11187e-05
375	1.53389e-06	1.78139e-06	1.94134e-06	2.16602e-06	2.4843e-06	4.16941e-06	4.24357e-06	4.08886e-06	3.76778e-06	3.78746e-06	3.7069e-06	3.71516e-06	3.95265e-06	4.1679e-06	4.45417e-06	4.36499e-06	4.49107e-06	4.76604e-06	5.22286e-06	5.81099e-06	6.04475e-06	6.48201e-06	7.46222e-06	8.14768e-06	8.69669e-06	8.92254e-06	9.33232e-06	1.07433e-05	1.22464e-05	1.32117e-05	1.34897e-05	1.57147e-05	1.59438e-05	1.66008e-05	1.67172e-05	1.9541e-05	1.88048e-05	1.81617e-05	2.13971e-05	2.40486e-05	2.67029e-05	2.68975e-05	2.66135e-05	3.37437e-05	3.6601e-05	3.49479e-05	2.85162e-05	3.06815e-05	2.30065e-05
335	4.21749e-06	3.78641e-06	3.49281e-06	3.5424e-06	3.99281e-06	4.11982e-06	3.8133e-06	3.60975e-06	3.4307e-06	3.35777e-06	3.4438e-06	3.47209e-06	3.54066e-06	3.55439e-06	3.67919e-06	3.86045e-06	4.24648e-06	4.57559e-06	4.99107e-06	5.75418e-06	6.34999e-06	6.97537e-06	7.93044e-06	8.43755e-06	8.82731e-06	9.33185e-06	9.52603e-06	1.06166e-05	1.14404e-05	1.26078e-05	1.27908e-05	1.41948e-05	1.4361e-05	1.44178e-05	1.47531e-05	1.80742e-05	1.81473e-05	1.81263e-05	2.14535e-05	2.51741e-05	2.79644e-05	3.03728e-05	3.24263e-05	4.46429e-05	4.73047e-05	4.85685e-05	4.35915e-05	4.13302e-05	2.76444e-05
299	5.39026e-06	4.7161e-06	4.15859e-06	3.9502e-06	4.08874e-06	2.52636e-06	2.16305e-06	1.95348e-06	1.95811e-06	1.9623e-06	2.07475e-06	2.14495e-06	2.18354e-06	2.1843e-06	2.4992e-06	2.9353e-06	3.19473e-06	3.59991e-06	4.22832e-06	5.1707e-06	5.73893e-06	6.62438e-06	7.44197e-06	8.17468e-06	8.44267e-06	8.9868e-06	9.04361e-06	9.40752e-06	9.91905e-06	1.10546e-05	1.16737e-05	1.24341e-05	1.27559e-05	1.33123e-05	1.44546e-05	1.83121e-05	1.75969e-05	1.92923e-05	2.15345e-05	2.53548e-05	2.94694e-05	3.56887e-05	4.25382e-05	5.97015e-05	6.1634e-05	6.47334e-05	6.18622e-05	5.524e-05	3.47956e-05
266.5	2.60351e-06	2.57971e-06	2.48614e-06	2.23276e-06	2.09696e-06	1.00353e-06	7.87593e-07	6.76053e-07	8.12943e-07	9.87944e-07	9.40927e-07	1.03933e-06	1.11945e-06	1.12911e-06	1.36995e-06	1.72976e-06	2.12801e-06	2.58314e-06	3.24612e-06	4.01546e-06	4.48793e-06	5.23299e-06	6.09318e-06	6.5387e-06	6.68841e-06	7.27165e-06	7.02497e-06	7.22124e-06	7.90367e-06	8.62568e-06	8.91765e-06	9.80962e-06	1.17014e-05	1.31894e-05	1.55664e-05	1.92397e-05	1.87769e-05	2.10297e-05	2.40733e-05	2.60314e-05	3.30498e-05	4.18797e-05	5.29112e-05	7.29519e-05	7.49123e-05	7.81398e-05	7.50311e-05	6.30477e-05	4.00641e-05
237	5.73156e-07	1.04212e-06	9.12885e-07	7.97154e-07	7.3784e-07	2.46793e-07	2.41427e-07	2.76079e-07	2.73816e-07	3.02665e-07	2.99486e-07	3.55561e-07	5.08779e-07	5.60816e-07	6.9254e-07	8.88162e-07	1.14345e-06	1.42786e-06	1.78808e-06	2.26521e-06	2.48122e-06	2.95037e-06	3.52925e-06	3.88554e-06	3.95637e-06	4.31854e-06	4.15917e-06	4.39247e-06	4.94928e-06	5.56861e-06	6.37828e-06	7.83696e-06	9.64268e-06	1.1743e-05	1.47328e-05	1.83638e-05	1.89042e-05	2.13156e-05	2.47846e-05	2.82144e-05	3.56925e-05	4.5863e-05	5.9458e-05	8.20695e-05	8.41036e-05	8.51736e-05	8.05664e-05	6.81384e-05	4.38578e-05
210	1.47447e-08	1.65695e-07	2.25242e-07	2.45895e-07	1.62698e-07	7.15854e-08	8.00346e-08	1.21099e-07	8.99454e-08	8.24602e-08	6.95873e-08	7.39383e-08	1.57819e-07	1.89513e-07	2.26501e-07	3.00155e-07	4.06748e-07	5.54101e-07	7.80885e-07	1.05907e-06	1.17747e-06	1.34039e-06	1.62626e-06	1.98654e-06	2.1185e-06	2.34527e-06	2.38087e-06	2.69804e-06	3.19601e-06	3.88169e-06	4.76977e-06	5.98363e-06	8.13522e-06	9.79565e-06	1.2671e-05	1.65775e-05	1.74751e-05	2.1874e-05	2.37084e-05	2.80717e-05	3.42145e-05	4.65827e-05	6.30752e-05	8.91273e-05	9.12887e-05	9.05585e-05	8.56398e-05	7.22245e-05	4.54569e-05
185	1.94859e-08	5.86788e-08	3.43684e-08	1.71894e-08	3.58705e-09	7.40511e-09	7.64339e-09	1.20672e-08	-9.1859e-10	8.45284e-09	3.39642e-08	3.08282e-08	6.61603e-08	7.28251e-08	8.59945e-08	9.10004e-08	1.22272e-07	1.8318e-07	2.99966e-07	4.31355e-07	5.5095e-07	6.49568e-07	7.35665e-07	1.02037e-06	1.29666e-06	1.39832e-06	1.27697e-06	1.28016e-06	1.81329e-06	2.44661e-06	2.55811e-06	3.67244e-06	6.07851e-06	7.52159e-06	1.00068e-05	1.43558e-05	1.6509e-05	2.01622e-05	2.39257e-05	2.80088e-05	3.55388e-05	4.75543e-05	6.38771e-05	9.19416e-05	9.5448e-05	9.4322e-05	8.74104e-05	7.25801e-05	4.53454e-05
161.5	-5.04733e-08	-1.33228e-07	-1.07856e-07	-1.28166e-07	-1.32002e-07	-9.41727e-08	-1.29408e-07	-1.55913e-07	-2.15696e-07	-1.87534e-07	-1.84209e-07	-1.27293e-07	-1.10871e-07	-9.52423e-08	-1.40506e-07	-1.10442e-07	1.02227e-08	4.1e-08	9.42819e-08	2.23816e-07	2.67501e-07	3.34476e-07	3.81384e-07	4.73407e-07	5.76256e-07	6.14491e-07	4.89468e-07	5.58852e-07	8.37055e-07	1.2127e-06	1.20737e-06	1.84201e-06	3.34965e-06	4.23944e-06	5.2079e-06	8.89925e-06	1.16072e-05	1.58412e-05	2.04456e-05	2.70866e-05	3.67088e-05	4.98458e-05	6.69532e-05	9.57183e-05	9.98687e-05	9.89235e-05	9.17648e-05	7.45761e-05	4.48981e-05
139	-1.21545e-06	-1.22922e-06	-7.91682e-07	-6.51533e-07	-6.49619e-07	-4.81479e-07	-6.58227e-07	-5.91019e-07	-6.26089e-07	-5.77966e-07	-5.43077e-07	-5.04529e-07	-5.87708e-07	-2.89976e-07	-2.55546e-07	-1.43002e-07	1.97469e-08	9.80071e-08	1.29585e-07	3.31303e-07	2.21247e-07	3.08726e-07	4.03139e-07	4.32545e-07	4.27081e-07	3.80576e-07	2.41947e-07	3.05532e-07	4.11172e-07	8.71958e-07	1.59987e-06	1.68162e-06	1.96573e-06	2.71722e-06	1.18493e-06	2.58541e-06	5.83858e-06	7.70291e-06	9.94815e-06	1.86819e-05	2.89233e-05	4.49019e-05	6.42131e-05	9.43168e-05	9.64217e-05	9.22708e-05	8.60852e-05	6.57575e-05	3.92606e-05
118	5.74626e-07	-2.14859e-07	-5.93122e-07	-6.81292e-07	-8.37608e-07	-5.98709e-07	-6.00747e-07	-9.03208e-07	-7.24176e-07	-6.16579e-07	-7.9078e-07	-4.29951e-07	-3.1144e-07	-2.01107e-08	2.30997e-07	5.95319e-07	3.12371e-07	4.74582e-07	3.03102e-07	3.14889e-07	3.10654e-07	4.62562e-07	4.56763e-07	4.68492e-07	4.44066e-07	4.62642e-07	4.45019e-07	4.10189e-07	4.94394e-07	7.2438e-07	9.04103e-07	7.46666e-07	9.35092e-07	2.32682e-06	2.05135e-06	3.47331e-06	4.73825e-06	5.28817e-06	8.25513e-06	1.40666e-05	2.15677e-05	2.8512e-05	4.17148e-05	6.28569e-05	6.87425e-05	6.3355e-05	5.27671e-05	3.86576e-05	2.21872e-05
99	-8.39093e-07	3.22281e-07	-2.03654e-06	-9.46835e-07	-1.66069e-06	-8.97184e-07	2.27301e-08	-7.07805e-07	-8.10862e-07	1.60333e-06	8.10425e-07	1.2815e-06	2.06579e-06	1.74006e-06	7.73405e-07	4.11388e-06	3.1339e-06	1.91698e-06	1.7682e-06	4.05766e-07	4.46642e-07	6.75107e-07	4.37736e-07	4.34651e-07	4.18004e-07	4.48032e-07	4.14846e-07	4.46053e-07	4.81137e-07	5.89782e-07	7.09515e-07	1.01615e-06	1.29219e-06	1.42401e-06	1.11577e-06	1.69779e-06	1.68972e-06	1.19992e-06	1.7008e-06	3.50058e-06	8.36287e-06	8.43516e-06	9.99746e-06	1.96237e-05	2.78813e-05	2.59271e-05	2.27661e-05	1.46605e-05	4.42896e-06
81.5	-1.26864e-05	-3.42843e-08	-3.95539e-06	-1.04922e-06	1.86486e-06	6.05849e-06	3.18995e-06	-6.5536e-07	-3.06289e-07	1.72842e-06	1.27446e-06	1.88826e-07	2.72773e-06	1.09643e-05	1.28736e-05	5.76657e-06	2.65852e-06	2.54705e-06	1.49786e-06	1.16043e-06	8.83098e-07	3.24944e-07	1.25958e-06	1.92915e-07	1.56273e-07	3.00803e-07	2.81696e-07	3.41781e-07	3.49813e-07	3.25555e-07	3.73344e-07	4.3233e-07	4.55315e-07	4.24705e-07	4.09025e-07	5.38952e-07	5.39796e-07	8.89588e-07	1.26865e-06	9.35717e-07	9.20867e-07	1.04345e-06	1.31874e-06	2.0322e-06	2.73826e-06	3.21479e-06	2.45024e-06	1.69949e-06	6.22458e-07
[truncated: 41 more columns]
