# Supplementary material for: Global climate forcing driven by altered BVOC fluxes from 1990–2010 land cover change in maritime Southeast Asia
Source: Copernicus journal article supplement (doi:10.5194/acp-2018-365), 2018-05-03
Supplement: Supplementary file 1 [file acp-2018-365-supplement.zip › dataset_Fig3.xlsx]

## Sheet: README
	Annual-mean ozone radiative forcing (mW/m^2) induced by 1990 to 2010 maritime Southeast Asian land cover change, given for each model grid cell.
	Forcing is calculated for 2010land_base vs. 1990land_base.
	This file contains the data plotted in Figure 3.
	The data are given for 90 latitude bands (rows) x 144 longitude bands (columns).
	The top row indicates the longitude (degrees E) and the first column indicates the latitude (degrees N).
	Units: mW/m^2

## Sheet: Ozone forcing
lat (degN) \ lon (degE)	-178.75	-176.25	-173.75	-171.25	-168.75	-166.25	-163.75	-161.25	-158.75	-156.25	-153.75	-151.25	-148.75	-146.25	-143.75	-141.25	-138.75	-136.25	-133.75	-131.25	-128.75	-126.25	-123.75	-121.25	-118.75	-116.25	-113.75	-111.25	-108.75	-106.25	-103.75	-101.25	-98.75	-96.25	-93.75	-91.25	-88.75	-86.25	-83.75	-81.25	-78.75	-76.25	-73.75	-71.25	-68.75	-66.25	-63.75	-61.25	-58.75
-89	0.884277	0.884277	0.884277	0.884277	0.884277	0.884277	0.884277	0.884277	0.884277	0.884277	0.884277	0.884277	0.884277	0.884277	0.884277	0.884277	0.884277	0.884277	0.884277	0.884277	0.884277	0.884277	0.884277	0.884277	0.884277	0.884277	0.884277	0.884277	0.884277	0.884277	0.884277	0.884277	0.884277	0.884277	0.884277	0.884277	0.884277	0.884277	0.884277	0.884277	0.884277	0.884277	0.884277	0.884277	0.884277	0.884277	0.884277	0.884277	0.884277
-87	-0.193237	0.584595	0.206421	1.42432	1.98206	1.49097	1.67249	1.58252	1.76941	1.94763	1.48682	1.19019	1.19604	1.48438	1.34473	1.78772	1.80005	2.07019	2.41248	2.02075	3.01221	3.14539	1.83386	3.61035	2.28845	3.23425	3.1333	2.96899	2.90784	2.83997	2.53833	1.48279	1.13794	1.69983	-0.296631	0.145874	0.38208	-1.23218	0.616577	1.60498	1.35779	2.67114	-0.530151	1.64832	1.59778	1.16504	1.60278	0.403076	-0.643311
-85	0.945557	2.93298	2.48059	2.65698	3.57092	3.32581	2.31165	1.91846	3.0907	3.15186	3.14886	3.07489	2.00366	2.57703	3.4491	3.92639	2.97839	3.05188	2.37146	2.26001	1.13049	1.94397	2.10547	2.13623	1.6637	1.1355	1.11792	0.94519	0.371094	0.523682	0.464722	1.46509	1.67212	0.295166	1.60986	0.454468	1.00928	2.06238	2.1405	2.73608	2.49402	2.15137	2.25159	0.622192	2.14929	1.22473	2.54761	2.15955	1.2865
-83	3.20703	3.6806	3.32983	2.91772	3.5351	3.54028	3.39258	3.51239	3.13562	3.01715	3.3111	3.3241	3.14526	3.23395	3.07489	2.72156	3.35309	2.69257	3.28375	3.02625	4.66309	4.21326	4.02344	3.3457	3.16644	3.2735	2.5033	2.36572	3.37329	3.61743	3.48328	4.11902	2.94214	3.05872	1.88782	2.07764	2.73401	3.38354	3.31494	1.40979	2.00159	1.53204	2.11877	1.15601	2.32776	2.30298	0.89563	2.20911	2.39307
-81	3.7395	4.08783	3.88867	4.02637	3.68756	3.47723	3.90131	3.16656	1.96948	2.50018	2.11047	2.63971	2.1571	2.15619	3.14722	2.67236	3.14722	1.74982	2.32013	2.02283	2.20508	2.54529	2.08386	1.87164	2.84143	2.82092	2.57812	3.04694	3.17401	3.36511	3.26031	2.49414	2.68689	3.17438	3.65369	1.87073	3.89319	3.70654	2.5509	2.15759	2.7771	3.37994	1.1427	2.02222	1.5614	3.78204	3.01483	4.01764	2.68628
-79	3.70959	3.84705	2.61151	3.00543	3.33997	2.68372	3.31555	2.53644	3.60699	3.04211	3.33136	2.91595	1.81866	2.80048	1.98492	3.112	1.36432	2.26703	1.78979	0.541809	3.82861	0.665466	1.77795	1.61371	2.05566	2.17413	1.59509	1.70898	2.46887	2.70709	2.04376	1.09851	0.866638	0.132629	1.2984	2.1402	1.0741	2.021	2.57007	3.26904	3.83185	4.48291	3.63116	2.81628	2.82861	1.72931	2.97217	3.02576	2.64099
-77	2.80072	1.91321	4.5152	4.31067	4.0033	2.56064	3.10007	2.65793	3.9198	3.06079	2.7424	2.43231	3.0564	2.96594	3.4588	3.09686	2.45941	2.87866	2.06189	0.791931	1.77533	2.15491	1.63263	1.93939	2.92078	2.74463	2.12469	2.43726	2.46216	2.3681	3.11359	3.60175	2.88428	3.76471	3.60046	3.69257	3.44	4.55341	3.49615	3.42566	2.14874	3.98767	2.54449	2.61536	2.60333	2.88269	2.95251	2.49084	3.3421
-75	3.08853	3.39609	2.82611	2.61359	4.34885	3.21902	1.87146	3.15491	4.63376	4.19769	2.78906	3.64011	2.68732	2.27179	2.1001	2.60284	2.40857	3.69489	2.85748	3.35486	3.68433	3.85638	3.34619	3.06927	3.14746	2.91711	2.9256	3.94818	4.71451	3.92572	4.23355	4.40186	4.2149	2.61182	4.10089	3.90869	2.60773	3.37384	3.21173	3.40155	3.0271	3.26056	3.15881	2.45984	3.54321	3.30609	3.37604	3.31299	3.07617
-73	1.36462	4.05872	2.6236	1.24237	3.66864	1.69687	2.02594	3.80029	4.2702	4.34811	5.33319	3.06891	4.40042	2.98685	1.78699	4.36713	3.72571	3.42661	1.93066	2.81793	2.85126	2.96661	1.52234	2.05692	2.59561	2.32733	2.23819	2.93127	2.97717	3.7092	4.02777	4.35852	2.69824	2.67584	3.20892	3.75616	2.65015	3.07935	3.68408	2.47064	3.48364	4.43817	4.43445	2.62109	2.74841	3.30188	1.85028	3.625	1.36139
-71	2.52112	3.26099	2.58282	2.00674	2.13666	1.3735	4.22552	1.28467	1.17145	2.5769	4.02286	3.62735	3.62524	-0.540741	0.961365	5.52844	1.80887	2.05377	4.81415	3.36453	1.89197	3.25705	3.71182	4.93936	3.89258	2.2522	2.40143	4.5177	3.26044	2.95554	3.42868	4.17932	4.22794	4.8074	3.53378	3.09457	5.14697	2.61978	2.19742	2.09119	3.71228	4.24774	4.21295	4.43024	2.85571	3.75592	1.89618	5.09088	3.88007
-69	4.84265	3.09421	4.86984	3.71097	6.16501	2.54761	3.68271	3.18814	2.88782	2.15741	2.21011	3.58356	2.30722	4.2536	6.18466	4.0296	3.99463	3.74554	3.38235	3.82413	1.80322	4.19968	5.68109	4.75925	1.67026	1.2608	2.61169	-0.212219	2.03629	4.43439	5.75134	5.6322	3.02341	4.284	2.25095	4.41083	3.85928	5.29156	4.62561	3.96378	3.66458	3.26337	1.41318	3.41846	2.05927	4.41693	3.13043	3.35657	4.24469
-67	2.77499	3.19434	5.07812	2.48199	0.903534	4.05103	3.57672	3.40582	1.8938	2.42114	-0.0154114	2.59299	3.29858	3.12848	4.70035	3.58414	5.57007	1.18793	3.93378	2.80688	2.76166	3.78214	4.20172	2.27704	3.11304	2.05234	3.2171	3.97455	1.32236	5.16437	5.79504	0.813812	6.14844	3.8548	1.16257	2.40668	2.38626	4.36218	3.61984	6.31528	3.25897	3.6907	2.3602	2.2662	4.34814	3.0473	4.87518	3.36481	3.95935
-65	3.9353	4.1615	3.37708	5.07422	2.73407	3.68149	3.66467	5.59308	5.48917	0.978851	3.08698	3.98355	3.04611	3.5318	4.27585	3.25421	2.3905	3.05865	2.10538	4.29764	4.69873	2.45178	0.978851	2.76715	4.96371	2.31924	3.99182	3.81079	5.198	2.86447	5.88321	3.48135	5.34534	5.73691	3.12827	5.09177	2.30005	2.94086	3.54892	3.41458	2.81519	2.35785	4.19205	3.04355	5.63077	2.08026	2.94107	4.6427	4.85217
-63	4.01279	2.85303	3.04318	3.13852	3.29361	3.453	4.28516	4.01028	2.32132	3.64984	3.88693	4.57495	4.18536	3.90213	2.81799	1.85358	4.52328	3.92776	6.61182	2.14682	0.496582	2.12961	2.50809	0.494171	4.0213	3.22525	4.79431	2.06631	6.02679	4.45566	4.28214	3.54105	3.99173	5.79434	4.65115	5.53494	3.71445	4.80823	1.37152	3.52243	2.03018	3.50177	2.98285	4.8598	3.2222	2.05841	3.73003	3.39069	4.65921
-61	4.71356	3.11499	3.26575	3.94299	4.21048	4.23608	2.89453	0.383575	3.06543	2.86237	4.05072	3.65948	4.83966	5.76068	4.78958	2.85205	3.08881	3.84756	5.71619	3.87439	2.82281	1.54825	2.51419	2.05042	3.94852	5.7327	3.80859	2.92822	1.87357	1.35617	2.40341	5.31039	3.68472	2.34378	7.11365	1.4325	0.717255	3.80594	4.13272	1.80377	3.5813	2.96317	4.04337	2.24548	0.461426	1.8681	5.53758	5.10095	4.0515
-59	3.77118	5.07861	1.47745	4.34549	4.15887	4.75183	4.00293	1.89993	5.03043	1.98654	2.11249	4.54578	4.10257	2.98868	2.36804	4.14706	4.26984	2.32773	4.2496	5.233	4.9576	5.87155	3.10873	3.69208	4.27478	5.10928	4.95374	4.30743	3.11972	3.95197	5.64633	4.85855	3.65436	3.89413	4.82785	4.26862	3.97171	3.56198	3.14532	3.77548	2.45175	0.797638	3.36279	1.7431	1.86482	3.9682	3.09122	3.91428	4.53357
-57	3.69507	4.42201	4.4295	5.62086	3.42239	3.76573	2.2753	3.73647	2.22932	4.17128	4.65417	5.50812	4.60655	5.82674	5.94669	2.56432	2.78537	3.34303	5.20834	6.7916	6.25949	4.17923	4.44373	3.48637	4.80428	3.26901	5.5937	4.12955	4.46718	5.72546	3.91135	5.68628	5.10086	3.18155	4.53494	7.10724	4.19592	2.93945	4.94287	7.42218	4.9603	3.1304	6.52087	5.21622	3.28036	4.96829	5.42499	4.69867	4.12122
-55	4.20227	3.84718	3.55989	4.15517	2.81493	2.03172	3.62529	4.4986	4.54303	4.86737	3.37712	4.17528	5.48483	5.10094	6.1889	3.82835	2.86505	3.86084	3.83545	5.31122	5.81596	5.5098	5.25865	3.37349	4.32297	4.89961	6.2581	4.38638	3.82227	3.5426	4.19016	5.08852	4.22128	5.18613	5.31056	3.77097	3.91806	7.75298	5.30026	4.26871	5.55545	5.33676	2.91306	6.23811	5.05779	5.1077	4.61481	2.99734	4.52991
-53	5.74487	5.5649	5.3544	5.01797	4.97305	6.19188	4.45116	4.06712	4.31766	3.89703	3.59306	4.02472	5.4577	5.56772	4.68579	3.31497	4.36929	4.21121	5.79842	5.61693	4.11154	4.67274	4.86905	5.00232	6.57968	5.18941	6.48424	6.11029	6.57585	4.61507	3.9727	5.54202	5.64023	4.547	5.19322	3.79132	4.48788	5.1367	4.78494	5.37697	4.67679	4.65692	4.89203	5.15108	4.58002	5.99527	4.16789	6.03514	6.96155
-51	5.66454	6.03359	3.60732	8.28104	5.44778	4.3316	5.452	4.47139	5.8476	4.57866	5.1658	4.06326	4.44695	5.51118	6.8345	5.0139	6.66969	6.12675	3.42515	5.55886	5.74149	6.77269	6.02721	4.38238	5.92216	5.3875	5.47565	6.22096	5.33726	4.79901	4.68806	5.73273	4.91998	6.74302	7.72778	5.51653	5.25012	5.55394	4.70711	4.9632	3.80211	4.36378	5.7468	6.12949	6.31274	5.93707	5.23389	5.35847	5.98589
-49	6.68465	6.22093	5.89012	6.34196	4.99426	4.47845	6.16849	6.21501	5.25095	4.18893	5.50565	4.69789	4.88348	4.46831	6.75357	6.56549	5.35704	5.59175	6.73502	7.27478	5.27502	6.68657	5.82273	5.95309	5.93816	5.24684	6.91164	7.03151	5.52567	4.41812	4.49147	5.16052	4.36201	4.7941	5.27136	7.63245	4.95484	4.96985	5.50653	5.73444	4.73339	6.20848	6.09564	5.35757	5.42505	5.90347	5.05446	4.92387	7.13905
-47	6.09882	5.99057	5.02332	6.67871	5.17239	6.30081	5.51184	6.14581	6.37842	5.10803	5.94916	6.69974	5.48245	4.03656	3.72855	5.30264	5.72104	7.19235	6.28581	6.12837	6.23753	8.56973	5.92162	6.18855	6.51202	5.88501	6.33203	6.33293	6.56331	5.2323	6.6313	5.01962	6.02481	7.07462	5.30345	5.74307	4.29164	6.35588	7.19865	5.39426	5.86336	4.12704	4.97194	4.67987	5.9489	5.99433	6.26698	5.7098	6.0636
-45	5.37268	7.04758	5.55014	7.04858	5.03131	7.09988	6.71472	5.84363	7.04773	5.10883	6.50851	6.22931	6.00751	6.78192	6.19757	7.64203	7.93747	7.04132	8.07977	8.49469	6.60394	5.68564	7.06784	5.02974	7.07056	5.40448	7.47351	5.91217	7.11307	6.15967	6.05759	5.98761	7.00336	5.95441	7.17639	5.57874	9.09827	6.17337	4.49257	7.283	8.86122	7.20059	5.49145	6.62884	5.03423	5.24982	6.65263	5.01198	6.73677
-43	7.33368	7.08328	7.2453	7.108	8.89224	8.50162	8.02509	7.44748	7.11194	7.69275	9.06268	7.29895	7.66388	9.05612	7.79419	5.35165	8.37585	7.32904	5.68303	6.383	8.76343	7.95743	8.24329	6.64548	7.79407	6.11923	6.32507	6.35428	6.79163	7.7276	7.72333	7.29355	7.94537	7.77856	6.71527	7.02484	6.81448	8.30264	7.33838	6.05991	7.54456	7.37152	6.47876	6.2541	3.38443	6.44827	6.34146	7.35754	7.71262
-41	7.078	6.27637	6.47314	6.95898	7.25897	6.72229	7.96588	8.24799	8.58356	9.30438	6.92407	8.58508	9.41159	7.4408	6.97861	7.12317	7.45959	7.24356	7.70065	7.21443	9.32394	7.37473	8.90329	8.87018	8.89325	7.96307	8.32303	9.37985	7.77835	10.2538	9.87534	7.4267	7.17804	6.20477	6.2048	8.96332	7.3642	7.36148	8.42059	8.98938	8.59113	7.9234	9.63995	8.62149	6.8749	6.74309	6.80029	7.19449	6.01254
-39	7.36829	8.60883	8.03174	8.04333	8.62402	9.78589	7.70258	8.44061	8.93518	7.15454	10.2522	12.1761	7.55597	9.71362	9.27332	7.83795	7.86652	8.15961	8.03033	9.16315	9.05301	9.64246	9.57404	9.24429	10.7094	8.9726	10.0861	10.1904	8.94189	8.73523	9.146	8.29114	8.16205	8.00854	7.51532	9.37378	9.84717	8.43469	9.74014	8.80096	9.98059	7.96475	9.06665	8.54482	7.60687	6.81763	8.6561	8.23718	7.02582
-37	7.96252	10.6593	7.20862	8.6922	7.35938	10.0897	10.0119	8.12463	9.91388	8.99677	8.12482	9.27301	11.5025	9.89777	9.5983	9.00201	9.3588	9.50287	8.13434	10.1759	8.80042	7.30261	9.32355	9.97205	9.31622	8.78723	8.57336	8.94006	10.8311	9.78503	9.52863	9.17725	12.1066	10.3147	9.28558	10.7403	8.74261	10.7914	10.5605	8.76654	9.89478	9.5415	9.29327	8.00208	8.7634	8.78748	8.56299	9.72827	10.1415
-35	9.45245	9.74463	8.4176	11.0162	10.2703	9.8338	9.8924	11.1463	11.377	13.136	11.6245	9.21405	12.0716	10.0372	10.1542	11.1459	9.25491	8.98022	9.87128	11.2718	11.8855	10.3093	10.7378	10.8685	12.2778	10.3286	10.3334	11.3557	11.5675	14.567	10.9183	8.18689	11.8492	9.16022	10.9104	7.62964	10.6497	8.61493	10.6625	9.93695	9.63312	8.33539	9.13501	9.33426	10.7065	5.95312	9.04272	10.6821	8.17029
-33	8.4021	9.66766	10.7276	9.48376	12.883	13.1942	10.6271	10.5702	10.9188	10.339	12.7492	12.4875	11.3276	11.3681	14.9388	11.415	11.9335	8.85425	11.9088	11.4451	11.9554	10.6138	9.48938	11.3163	9.57928	9.53394	9.33594	9.73938	10.027	8.93872	12.3055	12.3232	12.8644	11.783	13.7653	11.0824	13.7543	10.723	13.1366	9.76666	10.3634	12.4535	11.9669	11.1132	10.8029	11.592	11.4559	10.136	12.2026
-31	14.0599	11.0023	11.8173	11.3541	12.5187	12.2335	14.3419	10.8793	12.166	14.8954	13.2484	11.9702	13.263	13.766	14.043	13.0101	10.5505	12.4748	12.0781	12.1204	11.7194	10.5463	11.7601	12.3101	9.55878	10.7569	11.129	14.449	12.2497	13.0815	11.7582	13.5421	14.0025	13.4206	13.9929	12.4645	11.962	12.86	12.3557	12.6599	13.9243	11.1633	11.7452	12.1589	9.40118	14.6057	13.5242	14.5389	14.1304
-29	12.7499	14.4749	15.9221	15.0763	14.3702	13.6404	14.0488	13.3384	16.2314	13.2083	14.9084	12.6257	13.5406	13.5359	13.2438	15.3303	13.7204	12.0064	14.2724	9.55621	11.2179	12.6822	11.2711	11.1781	11.1483	14.717	13.0769	13.5223	13.2861	13.6962	16.1032	15.0323	13.7058	15.3805	14.6532	15.0839	13.8936	13.2594	14.4012	13.0187	13.8718	12.5726	13.4652	14.7449	8.9993	15.3974	18.73	14.7825	11.6073
-27	14.9164	14.696	13.5209	15.4337	17.998	14.4012	16.2404	15.8953	13.8354	15.3544	15.4429	17.8515	14.0459	14.0511	14.097	12.4913	15.1266	9.77319	14.2952	12.7853	12.3239	14.1023	12.8436	13.8481	15.3041	13.7632	14.8249	11.1248	15.4313	14.4881	15.7773	11.8542	15.9983	15.6202	12.6349	14.7686	12.983	15.8477	14.7666	14.5828	15.6291	14.1853	15.0368	14.9391	8.44968	10.7886	17.511	12.9698	12.6422
-25	16.9585	18.5453	17.4812	14.858	19.472	19.7096	16.4899	15.989	18.0302	17.5091	16.5817	16.8027	20.4513	15.5271	17.1656	18.6202	13.9888	14.9688	15.2114	17.5904	13.7711	16.1351	12.2112	17.8448	17.6223	14.5491	12.6124	15.7573	14.6381	15.3568	17.8633	15.9131	15.5372	16.9045	18.973	16.7678	17.7622	16.2122	13.8918	14.7902	13.1197	13.5914	14.1249	14.6478	10.2649	9.64053	17.5587	12.5735	10.9123
-23	21.6454	20.9806	23.24	17.3281	18.0371	16.782	18.019	16.9713	15.4675	16.8974	18.7381	18.3193	17.1462	16.7495	18.5877	18.3403	16.2702	17.9554	13.9595	16.9166	12.213	14.7734	16.4357	17.3318	18.3533	16.5153	17.6694	16.8108	18.8048	16.2772	18.2447	18.3087	16.5393	16.5275	16.02	14.7537	16.7945	15.2591	14.509	13.7734	12.0449	13.5934	13.6914	13.5757	11.6434	9.04871	14.5652	9.60046	11.1432
-21	18.2342	20.842	20.337	20.6363	19.2411	20.562	15.894	17.4708	19.1007	16.6294	17.9951	20.7947	18.2578	18.3661	17.0195	17.9551	17.7433	15.8669	15.3262	19.4995	16.7805	17.5331	13.8582	17.8099	17.1405	16.1955	17.3492	16.5931	17.4157	17.5916	18.2083	16.1276	15.5861	16.2987	16.0158	15.008	15.5493	15.5255	13.8198	13.2673	14.1292	13.3135	12.9426	12.8455	9.16205	6.65051	10.3179	10.5848	8.58771
-19	20.6338	23.5922	20.6479	21.8082	21.9406	14.4744	17.0458	19.8274	15.9667	18.5278	18.7945	17.0475	20.0225	19.1827	19.0862	18.7673	14.7259	17.5238	16.8854	19.5013	15.951	17.0657	16.0343	19.6744	18.6788	17.6667	18.4016	16.3699	17.0472	16.4033	16.9838	16.0632	15.9866	14.6482	15.5104	15.4998	14.6694	16.2461	12.892	13.48	13.1678	12.2828	10.8958	10.3423	7.65582	6.16559	7.40442	7.52765	7.0509
-17	20.1817	22.564	18.9165	18.0483	21.8992	20.5723	20.9213	12.7452	19.2184	16.7598	17.9151	13.8682	14.1475	21.6425	17.1444	17.7887	13.8339	18.3674	20.5817	17.6447	16.4987	18.7302	17.8396	17.1986	18.4921	18.1165	16.6085	17.7967	17.5009	14.9946	17.1172	15.4468	15.9441	14.9659	15.5732	13.5804	14.0308	13.5247	13.9331	11.6094	11.9551	9.66992	9.53284	8.99487	4.69299	8.50598	6.42291	5.87299	6.87256
-15	20.5569	20.5145	18.7334	18.1832	14.894	20.8367	20.6798	21.5591	18.0476	17.594	21.0665	14.2404	18.5826	16.8027	20.6588	19.1163	18.9393	18.0436	15.933	15.9158	17.9478	19.6866	18.0192	18.6589	17.5415	17.2838	17.2789	14.3618	14.9064	16.2128	15.7507	14.9805	14.7416	14.437	14.9508	14.6724	13.0116	12.0723	11.1178	10.1777	10.585	9.95715	6.31024	5.02115	5.46936	9.85443	8.44873	4.73279	8.40759
-13	19.3845	17.3556	10.6795	20.794	18.0626	19.27	18.5137	10.3706	18.1597	12.7927	18.1232	17.5117	13.8364	19.1913	19.6614	18.4651	17.162	17.2779	17.7921	17.0041	18.2915	15.9647	16.8496	15.0189	15.7953	13.5945	14.7113	12.6804	14.8975	14.3818	14.6564	15.6748	13.0815	13.9907	14.5471	12.4008	11.6298	10.7651	12.5308	9.81482	10.1973	8.10217	7.03979	4.7052	8.88208	3.74713	4.30176	4.83557	1.92261
-11	16.0435	13.8812	16.0767	16.9263	13.4035	7.76343	17.4426	18.1755	13.9917	11.9643	17.9912	15.564	14.5359	16.4424	16.6254	16.1158	15.561	17.5065	12.8567	16.1061	14.6911	16.1754	14.467	16.1249	13.9983	14.0729	12.897	13.2162	13.0848	14.6222	12.6223	13.994	14.0659	13.5115	13.4819	13.278	11.9888	9.86133	10.7217	8.7948	8.25305	1.88989	6.03284	6.60559	4.29889	3.94714	7.69434	2.617	9.93323
-9	7.23587	12.2363	10.293	18.3611	15.7594	14.7742	11.8511	17.3304	11.0693	14.9722	12.1771	14.1206	14.5297	16.5478	16.2959	18.2007	15.425	14.3191	15.7407	16.4069	13.004	14.7274	14.5318	13.2628	14.9877	13.5931	13.8766	13.1121	12.9861	13.0804	11.9359	13.0398	12.9836	12.1501	13.4906	14.292	12.2117	9.03699	8.97473	5.55237	5.43799	3.18091	9.57581	3.98639	1.90717	1.07263	4.56042	8.84717	4.83551
-7	10.5669	15.1293	18.2915	12.9022	13.0517	12.4393	11.7666	14.6668	14.4525	12.4335	16.7913	15.4012	17.9653	15.1258	15.2443	11.0481	14.5211	14.5991	13.8317	14.3716	12.9485	13.4217	13.6089	14.5662	13.7653	13.2385	13.3359	12.9321	14.3053	13.524	13.1633	13.8046	12.6881	10.083	12.7368	11.4138	8.64722	8.63977	7.47644	8.12329	3.43573	5.13318	5.53326	2.12976	5.41437	3.65112	2.25885	5.19684	4.17841
-5	13.9839	11.6001	14.384	13.3837	11.7078	13.8411	14.1949	13.4662	9.1228	16.8049	15.2892	8.52771	14.4116	13.3072	13.9691	13.0448	13.7062	15.9717	13.69	11.9388	11.9922	11.2081	11.9448	13.1083	12.0454	11.418	10.1177	12.1079	13.2599	11.3562	12.7849	9.81531	9.21521	9.36853	8.99634	8.85156	8.96521	8.4176	8.91272	8.04993	5.57373	8.71753	-1.62952	-0.606262	5.60059	4.51819	0.219299	6.61584	-3.14966
-3	12.1762	14.4304	13.2044	13.243	10.9795	10.6093	11.39	12.6441	12.4059	11.1512	14.0817	13.0691	14.8239	13.0437	10.2632	14.7703	9.92444	13.7764	11.7702	12.4484	10.3192	12.8624	10.2023	14.0233	9.98492	11.4768	10.6854	11.2216	11.0369	11.228	11.2969	10.0492	7.87781	8.77625	8.0116	6.35779	3.21228	4.9856	7.52795	3.97302	4.95392	5.07776	3.10944	2.97156	7.35577	4.54218	4.32648	1.82336	5.08655
-1	10.792	9.67438	13.0914	8.93622	10.4163	12.6161	10.8578	12.8302	12.8662	10.8179	12.6652	12.1442	11.0578	10.3083	10.9574	10.1339	10.8538	10.5067	11.9166	12.2189	11.0648	10.5026	11.4754	12.731	9.65997	10.4169	11.7002	9.14587	9.89661	7.79211	9.43506	10.5546	9.28796	9.54358	8.50781	7.95447	8.01929	6.20178	6.34875	6.83435	4.02289	7.33923	5.26483	6.03522	9.32898	5.53625	6.69824	6.26367	10.7925
1	8.5835	10.2859	11.1127	12.6071	11.0626	9.09039	12.5482	11.3025	10.9625	12.6822	11.1003	9.36786	7.54602	7.27252	9.33331	9.57428	12.0942	10.5023	9.04004	9.08521	9.75562	8.95599	9.00549	10.0393	11.3302	8.44769	10.0109	10.1699	10.2297	9.70294	7.31482	10.5513	10.8542	9.21411	10.9968	6.78284	9.75684	7.29834	7.49402	3.2489	6.60382	2.18335	3.50775	5.87671	6.86029	4.86731	4.82452	6.37573	3.03442
3	11.0478	8.05927	8.55499	9.34003	10.4014	10.3107	9.54016	11.7269	10.2255	11.1861	9.3634	10.5809	11.0448	7.10345	9.02979	9.76953	12.236	10.6415	10.8352	10.2738	8.51892	10.5338	8.35986	9.26135	8.2066	8.01044	9.68793	9.32434	9.72595	8.69922	6.09717	8.91663	7.67828	7.86066	9.52374	5.46045	5.35541	4.61108	6.86395	2.91132	2.59229	5.69971	3.04742	2.59729	8.31311	5.33142	3.39661	9.74536	4.73523
5	9.45667	11.2877	7.7962	12.6544	9.68011	8.5423	13.4901	9.68726	11.9621	6.60309	8.95166	8.10608	7.39728	5.3736	6.83899	8.58209	6.90411	8.82324	12.7529	9.104	7.24646	7.77148	8.13855	6.97705	6.04407	6.58722	9.6394	5.72974	10.9349	6.00586	7.68201	7.30182	8.55127	8.61432	6.2663	4.86938	7.41132	3.36035	3.80902	3.15186	1.06946	0.621826	6.29059	1.79065	5.95117	2.19275	2.97375	5.99475	4.84668
7	13.0803	11.9012	9.81091	10.0902	9.90637	11.6508	9.76648	13.0291	13.1707	11.3989	10.4888	12.6474	6.48657	11.2269	10.0044	9.84985	8.82953	10.6141	9.62146	10.6657	9.27148	9.43335	9.02734	10.4706	6.26239	6.93799	6.8468	5.84198	3.77759	7.56799	8.49603	6.90656	5.12054	7.27856	9.39764	6.0531	8.01062	8.63257	4.01978	1.82556	2.05725	0.56311	0.860474	7.39514	3.64331	3.2417	6.7572	4.73169	8.4873
9	12.7032	14.5396	11.9889	9.05426	7.9668	12.7286	10.9553	11.8597	10.592	12.2382	11.5629	9.72375	8.96912	8.33826	9.82806	12.5468	9.54144	9.07074	7.21484	12.1015	10.8252	7.71844	4.76807	10.3799	4.94269	4.39044	6.78748	6.20209	6.35986	9.81854	12.0059	11.9774	8.41724	6.1701	8.48022	6.40771	10.725	6.86707	5.98059	3.5235	4.3808	3.2699	2.85522	2.66797	7.9093	4.43066	3.82507	3.71997	4.97845
11	11.6196	12.2632	13.0312	12.4355	10.6379	13.0314	8.91528	10.8574	12.9792	9.95654	13.3329	13.0894	10.3107	12.7315	12.6362	9.76996	11.9221	11.4374	7.42792	9.51575	5.87512	10.8053	7.84326	9.49591	8.4621	8.79968	8.83203	9.18164	8.02094	9.55542	6.92004	7.854	8.35834	6.91766	6.04492	5.63403	4.7818	5.63342	6.53088	6.25049	4.25885	6.18622	5.36786	4.5022	6.84454	2.74231	5.37024	7.76392	2.45599
13	13.3223	14.1727	12.853	13.293	11.4747	11.4526	11.2086	13.319	12.5905	11.4912	11.009	13.146	10.6614	14.682	11.0303	13.4731	11.1367	10.0078	10.3798	12.4421	11.3871	11.2425	11.6002	10.8802	13.1772	9.33392	6.95099	7.90234	8.34033	8.7431	9.38013	10.4729	9.22009	8.75354	8.03998	10.0479	5.72418	8.3999	12.0063	6.60602	4.2663	4.72449	5.13721	4.89874	4.80737	6.41748	5.27539	8.47052	9.93945
15	15.1579	13.3125	10.8227	12.3669	13.2291	16.126	16.4207	11.8311	14.2891	13.6977	12.5463	11.2703	12.114	12.4192	11.4985	10.9689	11.2375	13.0924	13.1302	14.8691	12.9862	13.1733	11.3295	11.7565	10.1653	8.96143	11.1423	11.5247	10.4033	11.6414	11.3428	8.22125	8.94678	9.27356	11.8356	5.87451	8.08112	8.67279	11.8627	8.4884	6.93469	5.72888	6.03693	9.31329	12.2919	7.13287	7.1095	7.2594	10.0649
17	15.6148	16.4415	12.4446	14.3152	11.7958	11.638	16.3649	16.5815	11.5995	14.5705	14.0696	14.091	10.9076	12.7319	12.9009	13.5599	12.0804	12.6411	11.1042	13.8222	14.1608	12.7979	12.5451	13.4985	12.7702	11.7802	7.5871	10.1799	8.3938	10.4374	8.71515	9.37622	7.14819	5.89044	10.2454	11.6623	11.2057	9.83582	8.80493	9.59955	8.21082	11.7341	7.76691	8.3559	12.1614	7.7041	8.58752	8.31531	8.26392
19	13.8824	12.6006	15.3724	15.5833	10.5126	11.1	13.7021	17.8046	13.5168	12.5266	12.4963	15.6357	10.5333	12.4237	12.4222	14.7838	12.6573	11.2323	13.5975	13.1405	14.0778	10.7778	11.5706	11.1738	12.7782	13.0233	13.0197	11.7486	12.1788	11.8571	10.5367	9.57941	8.94666	10.3768	8.24756	10.0983	11.5665	12.3647	11.4888	13.4548	7.32306	12.1058	8.37036	10.4721	5.54272	9.5827	9.17529	9.4314	10.1726
21	12.2454	13.5552	13.812	14.2957	14.7125	14.1924	11.7803	13.7072	10.5543	12.98	12.8624	12.4849	14.7526	12.7669	12.4268	12.9906	13.2872	13.4865	12.7618	12.9167	12.4041	15.0562	11.1534	11.7889	12.1949	12.5231	10.4004	12.4133	12.9736	12.4905	8.263	8.70624	6.93518	9.36169	7.04578	9.85205	11.6605	10.5724	11.6353	13.1047	11.094	11.5995	10.9076	8.31067	13.5829	11.5071	12.3054	8.45135	10.165
23	11.7786	13.5778	10.4937	9.46161	9.47375	13.561	9.81104	11.6539	14.4658	11.9382	9.22791	13.3157	12.1133	9.53711	13.6236	15.2053	12.1678	11.7877	13.2085	10.9542	9.67932	9.54437	11.3108	12.1678	10.4327	11.1836	7.79865	11.6013	11.8773	10.0378	9.44653	8.21143	12.3901	12.9756	11.7083	13.648	10.5681	8.59528	15.2756	9.44702	12.0203	12.0323	13.5029	6.93781	9.64801	10.9052	11.675	11.9943	9.22705
25	10.9708	11.6396	6.95483	13.8323	11.4178	11.5291	9.52582	13.3354	10.9538	8.68921	11.9622	13.3433	13.1193	12.2011	15.4808	14.9492	10.8792	11.7985	12.41	11.0259	9.49811	10.9362	11.5286	9.35773	10.1823	10.3024	10.9697	12.688	12.3333	6.85114	7.56763	8.93622	11.4647	9.46368	12.5723	9.29413	12.0983	12.2452	10.8046	9.58282	11.476	10.3748	11.268	11.3265	9.64355	11.4072	11.3173	7.42358	6.61456
27	8.38531	8.80725	12.0453	14.1744	8.50372	8.83356	10.3801	11.0573	7.04187	7.19409	10.4584	8.38177	13.3903	12.2225	11.2297	12.5057	9.97052	10.8252	11.308	12.2156	8.32562	8.28192	9.78284	10.7133	9.9765	12.003	9.1377	9.57391	6.63293	8.13867	7.95563	5.85345	7.25238	6.8208	10.0544	9.09143	9.51294	9.26929	10.2329	10.8346	9.63635	12.9504	6.75012	10.0537	10.4388	8.69708	8.19861	8.65143	10.6826
29	9.38257	8.22235	7.04828	11.0753	8.92065	12.0422	9.62271	9.86316	6.16895	11.3333	8.65259	12.2759	8.22897	8.55804	7.73981	11.0129	8.74719	12.3767	9.67447	10.5172	10.4272	8.52945	10.7692	9.06989	11.6453	10.0795	10.4001	8.49088	10.1064	9.6483	7.0162	7.8877	6.14551	9.49036	7.56226	6.78674	11.226	8.64929	8.57416	14.8591	9.35748	5.51434	11.6367	7.66571	9.11243	8.95038	10.2393	9.93909	6.64334
31	7.17139	7.01355	8.2002	8.86023	8.83463	9.5795	9.44781	8.28247	9.56583	6.68893	9.2373	8.80762	10.2073	10.3457	7.78247	10.5073	8.98767	9.6449	10.2819	8.46216	6.01801	7.58603	8.47656	6.65756	7.78577	9.15347	7.14026	6.18518	7.96176	7.9798	11.6534	8.19466	6.811	5.87445	5.77057	9.59241	10.1852	7.58081	8.50916	6.68628	10.407	5.93726	9.09521	8.57581	6.3501	5.53894	5.97574	8.50665	6.74255
33	8.63293	7.89545	8.9978	6.00018	2.77322	8.24496	9.44226	5.92178	5.97699	8.16852	3.52533	8.60193	6.35464	6.46683	8.83426	8.03119	7.24457	7.54443	4.35214	6.86035	5.94577	4.47095	6.49911	7.33704	6.98407	4.73911	4.53937	3.98871	5.05899	3.66412	8.08533	6.13153	5.87447	3.97644	7.93201	6.99832	5.13098	7.72339	5.94797	4.46841	5.97809	13.3049	10.3036	2.80325	5.94116	3.27438	3.69614	5.72229	2.90047
35	8.60394	7.92969	10.1077	7.18356	2.55362	6.78796	5.77252	6.95087	6.50681	5.49734	5.75851	6.2785	4.70859	4.58368	3.41547	9.00128	9.78064	9.57785	7.90881	6.23111	2.97736	7.99359	5.5686	4.25665	3.81177	10.4349	6.54578	1.8407	8.10938	3.63379	5.14877	4.79077	5.34769	5.8295	4.13892	5.81548	6.96178	2.34624	3.98615	3.77109	8.85138	9.07625	5.48285	9.81729	5.98373	3.31274	6.55414	6.56271	5.1355
37	4.34268	5.57147	5.1958	3.11417	4.38232	8.1107	7.35205	6.20639	7.89429	6.28796	2.47836	5.2359	6.06528	8.76376	4.12595	6.24567	7.40591	10.0316	6.76562	7.97406	4.28088	6.86655	6.84869	2.31427	5.86954	2.62961	6.25766	-0.160828	5.52563	6.67902	5.1344	3.74026	1.79794	6.74576	8.50085	2.94296	3.32275	4.9032	4.53186	8.28854	3.46109	7.32184	1.28519	5.27066	1.52179	4.15286	0.537476	5.76132	6.12164
39	6.17691	3.83292	0.34079	3.65427	7.20316	2.26871	7.33084	7.25266	4.41354	1.23373	3.77972	3.50317	3.5968	2.97614	7.15543	-0.169006	5.34747	5.92511	3.8114	5.68201	2.66977	3.89044	10.2579	6.5509	5.41257	3.57996	5.64697	4.44788	-0.380981	4.95428	4.03723	3.63495	2.62418	-0.388824	3.07291	4.71759	0.179352	2.65314	3.17847	7.01566	1.25583	3.2197	3.87207	6.28027	5.59683	0.588287	4.10855	8.88464	10.7611
41	3.6781	2.17905	9.28967	1.78705	5.69528	3.09018	7.33063	4.73315	2.12799	3.07758	6.77942	2.35092	3.07883	1.14236	2.66202	3.42841	3.28568	5.67694	3.22583	4.62958	1.33682	2.57278	4.07495	1.77582	0.0918579	2.67883	3.84906	3.01685	-2.68152	0.214783	1.76367	3.78723	6.01999	2.35449	1.06958	6.86865	2.01526	1.65326	3.85992	-0.648346	1.67154	2.80997	3.97168	6.16483	4.92523	5.13419	1.26056	6.50818	7.84494
43	4.64111	4.38669	2.81134	1.3241	6.18024	-1.28348	0.87381	2.24399	3.78445	1.07245	1.26123	4.40109	4.60864	1.11069	2.13565	1.29477	2.48691	2.6369	2.23221	1.59363	0.283386	5.6893	5.14819	2.73669	7.58783	5.47531	0.505493	-0.64978	2.91803	2.84937	2.7962	2.02924	0.126984	6.58533	1.46243	4.0538	7.36917	5.91266	4.66486	6.0556	5.67499	0.459412	0.813477	4.29962	-2.95279	4.93552	8.01212	5.18765	3.00623
45	4.34537	4.51218	-1.60507	4.56033	6.845	1.0072	-1.01132	3.68378	3.20105	4.05182	6.48685	-1.98428	4.96466	4.15182	7.47662	4.064	6.64368	1.34311	0.0713501	2.5603	1.85184	0.924744	3.48392	2.58893	0.368286	3.39542	2.40076	4.04327	6.84262	4.87982	1.87518	3.80597	3.67023	1.14432	0.227539	1.40692	5.03857	0.85144	4.50208	-0.147644	5.40585	0.53595	3.35916	4.03748	1.60812	5.83444	6.33173	7.73282	2.18451
47	4.60257	-0.365173	0.199158	-0.666962	3.26358	3.43445	4.76422	2.63541	5.24158	2.47375	3.39069	4.20416	4.68143	4.83585	4.97601	-0.399139	3.52209	4.18661	1.43283	2.03964	2.9072	1.8396	1.45178	5.40234	2.43762	5.19446	0.56842	1.97864	4.54623	1.76068	3.67328	2.12851	6.03351	2.24469	1.52655	-0.632385	4.28589	6.00671	4.23685	0.755554	-0.0435181	1.36627	3.03058	-0.850037	0.485718	5.22675	0.819092	3.3103	5.56714
49	0.380554	1.38708	2.38916	2.97092	5.52631	3.41629	2.5993	1.64911	1.142	5.68008	2.71143	2.96594	3.00793	1.36081	-0.654785	2.21552	2.96722	-1.51376	-0.0515442	3.57861	0.461243	1.10495	2.27713	3.27319	1.75366	-0.842773	4.95493	3.8876	4.48947	2.40707	8.7594	6.76004	6.65948	2.35736	5.94464	0.15033	2.02206	4.65536	2.57944	1.53656	3.32001	4.06805	-0.319031	1.02472	-0.165588	7.07733	1.35217	2.85834	0.662964
51	-0.860779	0.834717	-1.65564	1.60266	0.709137	1.76797	1.1113	0.564362	2.2756	3.20016	0.949585	1.93073	6.23621	1.05872	2.30719	0.634094	-1.80289	-2.80844	3.68088	2.97086	4.09549	3.90817	3.62454	0.784058	2.11755	0.624023	0.407379	-0.578339	5.3884	1.54227	3.27069	4.50403	4.539	3.7128	-1.13074	4.80621	2.70355	3.24365	0.869843	0.279572	5.7851	4.09009	-2.66888	1.80298	2.74664	1.67542	7.54584	6.60083	0.288879
53	1.34412	1.47235	1.78406	1.58594	3.04895	-1.27667	-0.328094	2.29861	0.0270081	0.287231	5.18396	6.10541	6.47815	4.53394	-0.191742	2.63019	2.866	5.1069	3.37195	1.91257	3.18155	3.02032	1.01343	-0.270691	-1.57727	-1.70264	2.74127	0.380005	1.3927	1.13412	0.930267	3.25229	0.515167	2.93155	1.01392	-0.523529	0.136566	1.19345	4.44183	3.89978	2.20633	2.65683	-2.16681	2.25623	0.840881	6.39642	2.3703	1.86237	4.71875
55	0.596313	1.81018	2.61157	3.25446	0.374878	3.492	1.51849	5.43683	0.99881	4.43869	1.46161	3.84763	-0.951843	-0.94693	1.41058	0.806732	4.77249	5.85593	3.01102	1.41245	0.945801	1.91113	-0.226471	-6.27216	-2.38135	1.28659	4.03241	3.67612	1.6748	2.40027	0.786896	7.3197	0.102692	0.847107	0.642548	-0.922272	2.60352	2.27618	-0.651855	5.01562	1.92325	1.85788	0.883606	-0.689514	1.81433	10.9808	1.24774	-3.92786	4.82404
57	-0.821838	3.23749	-0.107544	4.20569	1.633	0.027832	-0.86438	-5.0097	3.00189	8.39682	3.71835	1.41284	2.207	3.17111	0.182068	1.70435	1.00821	4.40097	4.68289	-2.44684	3.93115	4.19949	-2.66687	7.3331	3.87689	6.27182	4.70981	1.9368	3.44034	4.7442	-0.259521	1.50156	3.97711	3.82672	2.45175	0.305389	3.88364	3.44977	-1.38235	6.81046	1.33719	1.59796	3.12442	0.0610352	4.68445	0.139526	2.44998	4.01447	-1.43927
59	1.60468	2.47717	2.88733	0.295654	3.78522	2.62817	3.66595	3.33057	3.34985	1.83832	-2.01569	2.74377	2.28336	2.67993	-0.261749	1.44196	0.549103	2.88986	0.0557556	-2.84338	6.48633	-2.02667	6.67212	4.97391	2.96765	3.02814	1.83569	1.79056	2.10388	4.3833	3.87164	1.87897	7.3056	3.30774	5.85587	2.03561	5.72568	-0.31134	0.949524	0.156311	2.74551	1.17743	2.51971	0.667114	2.96237	2.80408	3.48184	1.91876	5.01355
61	3.86652	6.09119	4.90747	6.39301	4.39252	-0.576599	4.81549	2.09277	5.63275	2.33472	2.349	-1.20343	3.12054	1.18695	3.03931	1.00037	-1.93195	-1.11597	-1.01611	2.49384	-2.51459	1.16565	5.33008	4.6283	2.48083	0.451111	4.57776	5.94958	-1.54578	-3.18616	-5.72852	5.74451	2.60095	3.39417	1.32812	1.69916	3.2157	5.55429	3.4725	3.42737	2.07394	4.79187	4.1738	1.85016	2.41025	0.130859	2.40143	3.06866	4.2962
63	-1.7478	-1.67316	-1.88287	1.67859	0.854919	2.11456	3.58636	4.8028	-1.6698	0.882446	-1.75	0.206055	1.49588	0.588013	9.58234	-3.44812	0.809814	8.02203	1.4939	7.59308	2.51639	-0.934326	2.93976	-0.28363	-3.85071	1.74908	3.25055	2.16986	-0.954529	4.25275	2.66321	-0.0853271	0.817932	-0.686035	-1.70306	2.10626	-0.0673218	1.09253	1.73981	5.19012	1.94739	4.24817	1.55273	1.52246	4.01605	1.65497	2.47351	3.73438	1.09192
65	2.90759	1.96106	3.34021	1.81128	7.05121	0.792969	0.929443	0.0342407	-0.0715942	1.49976	1.13556	1.41394	5.0379	-0.846558	-0.458313	4.91296	2.52869	-1.07379	-2.25195	-3.91711	0.679688	1.45569	1.07483	-1.95776	1.79877	1.46643	0.149536	0.470337	10.3907	4.302	2.30475	0.601013	1.39636	4.47626	1.64783	3.95856	0.237976	-2.27722	0.71051	0.613159	2.92554	-0.0532227	-2.43787	-1.60022	0.89502	0.180969	1.2637	3.91986	5.18372
67	5.26355	5.86823	6.17957	5.63824	3.97638	1.10022	3.73602	2.71594	6.47815	0.763062	2.6062	-1.30878	5.44446	5.45587	0.716614	-2.95312	0.924316	2.96503	-4.95007	-0.276917	5.60846	10.8885	-0.720032	3.72235	4.58118	2.84198	3.98883	0.548889	-0.562988	7.10742	4.49719	0.64093	1.7901	2.32581	2.92087	2.37405	1.90668	-2.35284	4.19888	3.14807	-0.467163	2.0791	0.146179	-0.165649	-1.41034	2.00418	3.44223	4.65076	0.412109
69	0.509705	1.68976	6.77875	2.29248	-0.664429	1.21484	4.01331	5.61865	3.0177	-4.30267	-1.2926	0.86554	3.44226	-0.742615	1.92194	4.99292	2.22095	2.43878	1.35846	-0.361328	-0.411743	2.00348	0.600464	2.85388	4.95471	0.659302	5.08295	7.39178	6.14941	5.73938	2.36389	1.56598	2.08441	1.77832	0.634338	3.83185	1.20471	2.88489	1.01416	0.359253	0.759277	3.79065	4.24094	5.09912	2.35034	3.81348	4.64911	1.26422	3.93524
71	1.95776	0.582336	-2.06451	4.34436	3.07574	9.31372	1.15216	4.19672	4.60205	0.60376	0.848816	4.87964	-0.575806	1.74432	-2.86816	-0.170593	4.85474	-0.33252	2.41418	1.95581	0.956665	3.62195	3.75568	5.06378	-2.14435	-0.0973511	2.27344	3.83643	4.86969	9.21338	5.21716	5.69672	7.37561	5.29388	4.32428	-1.99542	0.181763	1.8772	0.30365	4.11694	-0.299133	-3.12637	2.0202	-2.12683	-0.135193	1.60559	-0.748962	4.71832	0.012085
73	2.74133	3.05945	4.81415	0.520386	-0.331055	-0.629272	5.14087	0.819275	3.34161	2.78571	0.494446	-0.944824	-1.22839	-0.617371	1.71185	2.81628	-0.475952	1.17023	0.669189	-1.9859	0.942017	3.11902	4.6087	4.83569	3.82593	1.83081	0.0488281	-0.847778	4.0545	3.1814	3.11926	0.443298	5.37756	4.8089	-3.651	-1.23962	1.03638	2.00708	0.192505	-4.17389	0.269867	-1.37109	0.0643921	4.01813	-1.95844	-3.58661	-0.734253	-0.213318	7.04333
75	-1.35266	3.12335	6.46228	0.299377	5.00604	3.89288	4.06238	-2.02557	3.98285	1.26514	2.79633	1.12543	3.59808	-2.62781	0.854736	5.30237	1.00909	0.782532	1.31708	4.63708	4.37347	3.37994	4.24902	3.16388	4.26855	4.4585	1.36566	0.0700684	-3.03021	-0.255798	1.99841	2.83466	2.26251	-0.364563	3.62329	4.4837	1.56696	-1.03607	0.630981	-1.12805	0.298157	2.57178	-1.60217	-3.36444	5.99457	0.287842	-4.12347	-1.0506	2.69409
77	-6.24664	-0.825317	-0.110107	0.000915527	4.49628	-3.52429	-0.362183	1.80017	2.83899	5.26373	1.44696	0.362122	6.08881	2.63495	7.08313	4.20294	-0.871826	3.39331	0.925537	-0.440186	2.99603	2.36877	4.07849	-0.2771	-1.45459	2.80701	1.59009	0.852478	1.6507	2.40381	5.32172	3.02637	2.40363	-1.84167	-0.884216	-0.935242	3.49976	-0.0662231	3.50745	1.6828	1.55743	-1.31757	2.75433	0.428467	1.88422	4.04242	2.14404	1.78375	2.42297
79	-1.51459	-4.99603	1.0813	0.846924	1.57568	0.541687	0.647949	-0.58551	-2.59045	3.48566	2.23242	1.38623	4.85663	6.28259	3.72131	2.16241	-1.15125	3.04779	-0.623901	1.61609	3.4408	3.66223	4.07086	3.96289	4.38739	3.63855	0.525818	1.44092	0.0610352	1.68048	1.83899	0.35199	4.20654	2.76819	1.01855	1.89819	0.0300293	2.47205	1.63837	1.33673	3.15039	-1.5434	-1.94073	0.0363159	0.722778	1.82349	2.18457	1.79297	2.39941
81	4.62927	1.28351	-0.286072	1.19818	-4.26648	1.38843	2.13141	4.2981	1.48401	-0.796753	2.74518	0.0343628	1.30585	0.0317993	0.00860596	-1.89856	-5.21082	-0.661499	-0.166138	0.238953	-0.795959	-0.722656	1.59772	0.38446	2.58472	1.3302	5.58398	1.42328	2.1806	1.5152	2.4577	1.73102	-0.475586	2.48694	2.43372	-6.99286	2.48853	0.732727	-10.3944	1.62097	1.92206	-0.414551	2.65692	-6.40424	-2.02319	2.88477	1.9231	2.53583	2.34766
83	3.10632	5.28625	3.78436	2.4054	0.169189	3.25262	6.38403	5.80164	0.665222	1.42932	2.31232	4.44153	3.13452	1.45361	0.876526	3.48932	2.32495	3.3515	3.02856	2.26672	0.977661	2.60645	1.87012	-0.06604	1.22089	0.602783	4.94238	2.55688	1.12415	1.62646	3.88873	0.02948	-3.43512	-2.05841	6.72705	1.97644	0.851135	1.29901	2.26709	-1.21503	2.49384	1.08469	0.857605	-2.13104	0.882385	3.21185	2.59869	1.35449	-0.411987
85	1.38837	-1.12646	4.67957	2.84198	1.25403	2.66211	3.57104	2.31183	2.74646	3.42169	3.22461	0.661743	2.1076	6.56134	2.31476	0.874817	4.60651	-1.88214	-1.00995	4.32434	2.36084	-0.728455	1.41522	-0.854858	-0.0862427	5.34894	0.906677	2.45306	0.709106	-3.60693	-1.09998	-1.52405	-1.79974	4.69061	0.549561	1.58801	0.0440063	-2.3739	-5.48236	-0.590637	-3.28076	2.36707	2.80231	1.51648	-1.35126	2.70282	-0.591736	1.91345	7.96155
87	1.66272	2.75623	0.074646	4.77264	3.59253	2.3432	-0.14563	0.998291	0.157532	1.66193	1.96558	0.543823	2.27917	2.89368	-0.0178833	3.37341	1.79272	4.3595	-0.915283	4.98187	1.78485	2.78491	0.611511	2.60364	1.78223	0.458008	2.289	3.47791	4.11725	0.483826	1.2533	2.26361	-1.78064	2.40314	1.75977	2.05548	-1.50873	-5.16479	0.843201	1.46741	-0.155945	-0.765503	2.25116	2.2229	-0.647217	2.36884	-0.42218	1.67053	2.32458
89	14.2257	14.2257	14.2257	14.2257	14.2257	14.2257	14.2257	14.2257	14.2257	14.2257	14.2257	14.2257	14.2257	14.2257	14.2257	14.2257	14.2257	14.2257	14.2257	14.2257	14.2257	14.2257	14.2257	14.2257	14.2257	14.2257	14.2257	14.2257	14.2257	14.2257	14.2257	14.2257	14.2257	14.2257	14.2257	14.2257	14.2257	14.2257	14.2257	14.2257	14.2257	14.2257	14.2257	14.2257	14.2257	14.2257	14.2257	14.2257	14.2257
[truncated: 95 more columns]
