# Supplementary material for: Global climate forcing driven by altered BVOC fluxes from 1990–2010 land cover change in maritime Southeast Asia
Source: Copernicus journal article supplement (doi:10.5194/acp-2018-365), 2018-05-03
Supplement: Supplementary file 1 [file acp-2018-365-supplement.zip › dataset_MSEA_BVOC_Emissions.xlsx]

## Sheet: README
	Annual isoprene and monoterpene emissions (TgC/y) by emitting PFT for each of 57 model grid cells.
	2010 emissions correspond to the 2010land_base simulation.
	1990 emissions correspond to the 1990land_base simulation.
	The 57 grid cells are those for which the Gunarso et al. (2013) land cover classification is applied.
	This file contains data to support statements made in the paper.
	In each tab, the first column indicates the latitude (degrees N) and the second column indicates the longitude (degrees E) of the model grid cell.
	The tab names indicate the year (1990 or 2010) and BVOC (isoprene or monoterpenes).
	In each tab, data are provided only for the PFTs that exhibit non-zero emissions in this region.
	Units: TgC/y

## Sheet: 1990_isoprene
LATITUDE (degrees N)	LONGITUDE (degrees E)	SHRUBLAND	RUBBER PLANTATIONS	OTHER TREE PLANTATIONS	DIPTEROCARP FOREST	OIL PALM PLANTATIONS
-9	141.25	0.228119	0	2.31392e-05	0.00807404	0
-9	143.75	0.0154091	0	7.21643e-07	0.00503114	0
-9	146.25	0.031592	0	6.59593e-06	0.00421702	0.000128295
-9	148.75	0.123237	0	3.74322e-05	0.0374636	0.00931809
-7	138.75	0.295615	0	0.0014178	0.03226	0
-7	141.25	0.1573	0	0.00108725	0.0474598	0
-7	143.75	0.115948	0	0	0.0619412	0
-7	146.25	0.192717	0	0.000315474	0.0467763	0
-5	103.75	0.113402	0.000162076	0.0202984	0.00918498	0.0021591
-5	106.25	0.0467901	0.00011413	0.00478487	0.000951995	0.00492619
-5	136.25	0.00121499	0	0	0.00540045	0
-5	138.75	0.0616545	0	0	0.0508298	0
-5	141.25	0.0676833	0	0	0.0612417	0
-5	143.75	0.216414	0	0.00161829	0.0381186	0
-5	146.25	0.0107758	0	1.90716e-05	0.00511578	0
-5	151.25	0.0102051	0	0.000112462	0.00503495	0.00520399
-3	101.25	0.00508093	3.14037e-05	0.00108023	0.00385684	0.00277662
-3	103.75	0.22951	0.000540478	0.0338694	0.00837513	0.041053
-3	106.25	0.175743	0.000205049	0.00415483	0.00280393	0
-3	111.25	0.178166	3.82662e-05	0.000797738	0.0085296	0
-3	113.75	0.285526	3.5697e-05	0.000479092	0.0232922	0.000697298
-3	116.25	0.0875179	9.14831e-05	0.00132145	0.0123243	0.0266673
-3	133.75	0.0357735	2.44002e-05	1.4723e-05	0.0764817	0.00444675
-3	136.25	0.0132363	0	0	0.044467	0
-3	138.75	0.0259112	0	0	0.0614139	0.00530842
-3	141.25	0.0121231	3.37399e-06	1.18598e-05	0.022014	0.00531158
-3	143.75	0.0301724	0	0.000109633	0.0035103	0
-1	101.25	0.061302	0.000552444	0.0112963	0.0367684	0.10137
-1	103.75	0.0940571	0.000515802	0.0100937	0.0209646	0.105744
-1	108.75	0.010388	1.68865e-05	0.00094174	0.00331434	0.000100937
-1	111.25	0.465454	0.000155232	0.000365293	0.0473419	0
-1	113.75	0.308919	3.92424e-05	2.2147e-05	0.0583804	0
-1	116.25	0.378722	3.28782e-05	0.000912382	0.0267443	0.0118754
-1	131.25	0.00193616	1.29821e-06	0	0.00587824	0
-1	133.75	0.0023832	1.57515e-06	0	0.0056058	0.00136088
1	98.75	0.0521574	4.04583e-05	0.00677635	0.00891493	0.0190484
1	101.25	0.145504	0.000555055	0.0137954	0.0261008	0.413303
1	103.75	0.00900019	7.06558e-05	0.000713145	0.00290447	0.0448487
1	108.75	0.1483	5.52281e-05	0.000591872	0.00992728	0.013766
1	111.25	0.567309	0.000186145	0.00033077	0.0437197	0.0172989
1	113.75	0.0126907	0.000130045	0	0.0719024	0
1	116.25	0.238725	0	0.000514775	0.0581598	0
1	118.75	0.022444	0	3.58075e-05	0.00538496	0.000598901
1	128.75	0.0027249	1.20866e-06	0	0.00547209	0
3	98.75	0.0901776	7.41468e-05	0.00946243	0.0197052	0.221
3	101.25	0.00719558	0.000573318	0.00104691	0.0106336	0.362127
3	103.75	0.0114303	0.000497914	0.000432421	0.0133819	0.25493
3	111.25	0.000681409	1.38943e-05	0.000513858	0.00503765	0.000791956
3	113.75	0	0.000187607	0.00246431	0.0460626	0.0237472
3	116.25	0.081709	0	0.000607264	0.0681421	0
5	96.25	0.01483	4.90574e-06	0.000681013	0.00315983	0.00269993
5	101.25	0.0349244	0.00113646	0.00422703	0.0496923	0.428939
5	103.75	0.00122472	8.80264e-05	0.000111151	0.00473034	0.0294296
5	113.75	7.3585e-05	1.51544e-05	0.00123775	0.00429504	0.00558932
5	116.25	0.00453279	9.56615e-05	0.000237476	0.0446431	0.0344527
5	118.75	0.0201091	0.000232755	0.000168017	0.016477	0.159459
7	116.25	0.000528117	3.45403e-05	8.81292e-06	0.00501718	0.00602717

## Sheet: 2010_isoprene
LATITUDE (degrees N)	LONGITUDE (degrees E)	SHRUBLAND	RUBBER PLANTATIONS	OTHER TREE PLANTATIONS	DIPTEROCARP FOREST	OIL PALM PLANTATIONS
-9	141.25	0.263283	0	2.32184e-05	0.00793385	0
-9	143.75	0.0172902	0	1.05847e-06	0.00493754	0
-9	146.25	0.036237	0	9.74829e-06	0.00351359	0.000213672
-9	148.75	0.177612	0	3.73849e-05	0.0335311	0.0166706
-7	138.75	0.341828	0	0.00141487	0.0312479	0.00322609
-7	141.25	0.173457	0	0.00107437	0.0469067	0.0158124
-7	143.75	0.122024	0	0	0.0625803	0
-7	146.25	0.238945	0	0.000315921	0.0439153	0
-5	103.75	0.113146	0.000155118	0.0203141	0.00893445	0.00834926
-5	106.25	0.0438006	0.000155496	0.00493667	0.000956365	0.0137438
-5	136.25	0.00192151	0	7.06579e-07	0.00535754	0
-5	138.75	0.0661412	0	5.63629e-05	0.0499142	0
-5	141.25	0.0755616	0	0	0.0607563	0
-5	143.75	0.239078	0	0.00162315	0.0381464	0
-5	146.25	0.0106762	0	1.89895e-05	0.00508379	0
-5	151.25	0.0111647	0	0.000114049	0.00487969	0.0129779
-3	101.25	0.00458092	2.60504e-05	0.0011485	0.00363934	0.0218183
-3	103.75	0.196645	0.000479118	0.0333856	0.00676178	0.317875
-3	106.25	0.157164	0.0001368	0.00414055	0.00237231	0.0674117
-3	111.25	0.138102	3.90086e-05	0.000685758	0.00513029	0.430152
-3	113.75	0.304376	4.74665e-05	0.000435167	0.0184504	0.237498
-3	116.25	0.0802909	9.01659e-05	0.00135042	0.00967622	0.207332
-3	133.75	0.0429466	0	0.000169545	0.0753821	0.0160443
-3	136.25	0.0196048	0	4.99526e-05	0.0431924	0
-3	138.75	0.0423707	0	9.22977e-06	0.0610072	0.00548539
-3	141.25	0.0124831	0	1.42736e-05	0.0219202	0.012089
-3	143.75	0.0306006	0	0.000113408	0.0034929	0
-1	101.25	0.071407	0.00031608	0.0114751	0.0329595	0.466984
-1	103.75	0.0965132	0.000224152	0.0108883	0.0159198	0.629688
-1	108.75	0.0104124	9.77983e-06	0.000955713	0.00314818	0.0241549
-1	111.25	0.470875	0.000155106	0.000459277	0.0441709	0.150537
-1	113.75	0.346115	3.98562e-05	1.75145e-05	0.0526299	0.241384
-1	116.25	0.292738	3.68263e-05	0.00122905	0.0215848	0.15822
-1	131.25	0.00221623	0	2.11123e-05	0.00580575	0
-1	133.75	0.00340431	0	4.30669e-06	0.00553561	0.00224177
1	98.75	0.0597738	4.65545e-05	0.00230379	0.00772174	0.0667244
1	101.25	0.172386	0.000325139	0.0135312	0.0147523	1.10842
1	103.75	0.00942633	5.44316e-05	0.000602615	0.00179965	0.12898
1	108.75	0.148287	4.3953e-05	0.000594917	0.00753819	0.171317
1	111.25	0.552734	0.000205116	0.00273936	0.0373936	0.20762
1	113.75	0.0152319	0.000169059	0	0.0710125	0.0049888
1	116.25	0.251795	0	0.000831908	0.052874	0.179438
1	118.75	0.0250759	0	4.53572e-05	0.00454899	0.0356785
1	128.75	0.00314512	0	1.98372e-05	0.00545507	0
3	98.75	0.081999	4.03446e-05	0.00204589	0.0183856	0.604899
3	101.25	0.00952935	0.000519965	0.00127205	0.00840896	0.463766
3	103.75	0.0112253	0.000431868	0.000505594	0.0091891	0.477364
3	111.25	0.000762382	1.07549e-05	0.000520438	0.00346812	0.0657725
3	113.75	0.00380081	0.000199264	0.000937263	0.0399927	0.391002
3	116.25	0.104452	0	0.000782681	0.0652847	0.0556505
5	96.25	0.0154678	4.65987e-06	0.000687181	0.00305507	0.00310152
5	101.25	0.0314398	0.00103552	0.00400405	0.0454471	0.763451
5	103.75	0.00114447	5.91706e-05	0.000103744	0.00404197	0.0407887
5	113.75	8.45893e-05	1.50256e-05	0.000917874	0.00371699	0.0174675
5	116.25	0.00578567	0.000110335	0.000225799	0.0416413	0.271098
5	118.75	0.0297116	9.17723e-05	0.000238682	0.0117062	0.624174
7	116.25	0.000635664	4.92653e-05	1.29998e-05	0.00452809	0.0354401

## Sheet: 1990_monoterpenes
LATITUDE (degrees N)	LONGITUDE (degrees E)	SHRUBLAND	RUBBER PLANTATIONS	OTHER TREE PLANTATIONS	DIPTEROCARP FOREST
-9	141.25	0.0129888	0	1.80515e-05	0.00666278
-9	143.75	0.000760779	0	4.32031e-07	0.00322665
-9	146.25	0.0017674	0	4.05703e-06	0.00277329
-9	148.75	0.00740392	0	1.90905e-05	0.0207995
-7	138.75	0.020228	0	0.00102654	0.0248147
-7	141.25	0.0127437	0	0.000776044	0.0359838
-7	143.75	0.00841767	0	0	0.0506536
-7	146.25	0.0110483	0	0.000155653	0.0252659
-5	103.75	0.0055803	0.0439375	0.0104661	0.00513891
-5	106.25	0.00210903	0.036303	0.00296627	0.000628413
-5	136.25	7.0135e-05	0	0	0.00341661
-5	138.75	0.00409369	0	0	0.0416453
-5	141.25	0.00411146	0	0	0.0362198
-5	143.75	0.0137007	0	0.000829862	0.0213536
-5	146.25	0.000670328	0	1.15885e-05	0.00333636
-5	151.25	0.000673556	0	6.43547e-05	0.00311061
-3	101.25	0.000285625	0.00911018	0.000599911	0.00231345
-3	103.75	0.0130915	0.16276	0.0196005	0.00521975
-3	106.25	0.00917545	0.062331	0.00244386	0.00176675
-3	111.25	0.00827127	0.0115429	0.000462684	0.00532438
-3	113.75	0.0173586	0.0129186	0.000337333	0.0174667
-3	116.25	0.00540881	0.0281138	0.000782151	0.00784339
-3	133.75	0.00198031	0.00822818	9.63413e-06	0.0534432
-3	136.25	0.000769389	0	0	0.0248197
-3	138.75	0.00188091	0	0	0.0394014
-3	141.25	0.000884685	0.00102428	6.9427e-06	0.0138461
-3	143.75	0.00189809	0	6.40585e-05	0.00220485
-1	101.25	0.00296466	0.158999	0.00617801	0.0218423
-1	103.75	0.00423059	0.172111	0.00654379	0.0145086
-1	108.75	0.000483015	0.0050081	0.000537207	0.00203493
-1	111.25	0.0352772	0.0471024	0.000211713	0.0296962
-1	113.75	0.0216137	0.0125851	1.36432e-05	0.0387682
-1	116.25	0.0214697	0.0100633	0.000537663	0.0169506
-1	131.25	8.40956e-05	0.000446267	0	0.00418909
-1	133.75	0.000111154	0.000525864	0	0.00387745
1	98.75	0.00310409	0.0116966	0.00375226	0.00532861
1	101.25	0.010357	0.221616	0.0107881	0.0216259
1	103.75	0.000423842	0.0232036	0.0004545	0.00197741
1	108.75	0.00777616	0.0167375	0.000346298	0.0062343
1	111.25	0.0384259	0.0578672	0.000198153	0.0281563
1	113.75	0.000772059	0.0388663	0	0.0444
1	116.25	0.0161528	0	0.000294675	0.0360262
1	118.75	0.00115414	0	2.00215e-05	0.00323257
1	128.75	0.000166765	0.0003943	0	0.00369441
3	98.75	0.0052563	0.0202722	0.00492926	0.01112
3	101.25	0.000362451	0.179571	0.000635241	0.00690209
3	103.75	0.000670155	0.149287	0.000250849	0.00831482
3	111.25	5.64983e-05	0.00533499	0.000385934	0.00401514
3	113.75	0	0.0574158	0.00145479	0.0291846
3	116.25	0.0049229	0	0.000338114	0.0411116
5	96.25	0.000758517	0.00135017	0.00035828	0.00179677
5	101.25	0.00234696	0.319061	0.00226604	0.0288282
5	103.75	6.69521e-05	0.0264318	6.48065e-05	0.00294445
5	113.75	4.08323e-06	0.00600418	0.000961294	0.00353034
5	116.25	0.000266005	0.0259909	0.000122839	0.0250402
5	118.75	0.00109117	0.0664798	9.2174e-05	0.0097378
7	116.25	2.91701e-05	0.0100373	4.95029e-06	0.00302088

## Sheet: 2010_monoterpenes
LATITUDE (degrees N)	LONGITUDE (degrees E)	SHRUBLAND	RUBBER PLANTATIONS	OTHER TREE PLANTATIONS	DIPTEROCARP FOREST
-9	141.25	0.0148466	0	1.7814e-05	0.00644192
-9	143.75	0.000855523	0	6.35177e-07	0.00317479
-9	146.25	0.00202278	0	5.88478e-06	0.00227015
-9	148.75	0.0106677	0	1.90708e-05	0.0186241
-7	138.75	0.0233418	0	0.00102616	0.0240799
-7	141.25	0.0140088	0	0.000764967	0.0354771
-7	143.75	0.008801	0	0	0.0512973
-7	146.25	0.0136708	0	0.000155517	0.0236621
-5	103.75	0.00559596	0.0422807	0.0105292	0.00502574
-5	106.25	0.00196418	0.0494492	0.00305846	0.000631083
-5	136.25	0.000110247	0	4.10524e-07	0.0033454
-5	138.75	0.00443029	0	4.41877e-05	0.0415715
-5	141.25	0.00460079	0	0	0.0360289
-5	143.75	0.0151335	0	0.000832089	0.0213613
-5	146.25	0.000664661	0	1.15941e-05	0.00332991
-5	151.25	0.000734326	0	6.50496e-05	0.00300521
-3	101.25	0.000256036	0.00751806	0.000634404	0.00217154
-3	103.75	0.0112851	0.145164	0.0194425	0.00424045
-3	106.25	0.00822919	0.0416831	0.00244247	0.00149849
-3	111.25	0.0063899	0.0117595	0.00039697	0.00319969
-3	113.75	0.0185257	0.0172297	0.000307418	0.0138786
-3	116.25	0.00497021	0.0277292	0.000799976	0.00616292
-3	133.75	0.00237565	0	0.000110644	0.0525546
-3	136.25	0.00114421	0	2.58701e-05	0.024192
-3	138.75	0.00306115	0	5.47217e-06	0.0389404
-3	141.25	0.000910743	0	8.35537e-06	0.0137872
-3	143.75	0.00191554	0	6.59868e-05	0.002185
-1	101.25	0.00345476	0.0910198	0.00627881	0.0195898
-1	103.75	0.00432656	0.0745415	0.00703471	0.01098
-1	108.75	0.000481253	0.00288368	0.000541925	0.0019217
-1	111.25	0.0357722	0.047159	0.000266749	0.0277636
-1	113.75	0.0242488	0.0128016	1.08061e-05	0.0350028
-1	116.25	0.0166312	0.0112997	0.000725932	0.0137144
-1	131.25	9.62026e-05	0	1.41171e-05	0.00413819
-1	133.75	0.00015845	0	2.78662e-06	0.0038248
1	98.75	0.00353386	0.0133851	0.00126852	0.00458975
1	101.25	0.0121478	0.127947	0.0104266	0.0120464
1	103.75	0.000440436	0.0177527	0.000381372	0.00121674
1	108.75	0.00774243	0.0132779	0.000346894	0.00471854
1	111.25	0.0374624	0.06381	0.0016421	0.0240984
1	113.75	0.000925963	0.0504912	0	0.0438223
1	116.25	0.0170683	0	0.000477042	0.0328096
1	118.75	0.00129467	0	2.543e-05	0.00273792
1	128.75	0.000191529	0	1.24237e-05	0.00366356
3	98.75	0.00476864	0.0110102	0.00106363	0.0103556
3	101.25	0.000478824	0.161093	0.000763365	0.00539899
3	103.75	0.000659811	0.129579	0.000293631	0.00571419
3	111.25	6.35631e-05	0.00416466	0.000394566	0.00278801
3	113.75	0.000226139	0.0612689	0.000555861	0.0254562
3	116.25	0.00628942	0	0.000435373	0.0393546
5	96.25	0.000792938	0.00128548	0.000362378	0.00174123
5	101.25	0.00211845	0.291508	0.00215225	0.0264366
5	103.75	6.28732e-05	0.0176557	6.01334e-05	0.00250061
5	113.75	4.7214e-06	0.00589851	0.000706528	0.00302768
5	116.25	0.000338876	0.0298996	0.000116505	0.0232958
5	118.75	0.00161437	0.0262242	0.000131026	0.00692191
7	116.25	3.51272e-05	0.0143271	7.30432e-06	0.00272822
