# Supplementary material for: Global climate forcing driven by altered BVOC fluxes from 1990–2010 land cover change in maritime Southeast Asia
Source: Copernicus journal article supplement (doi:10.5194/acp-2018-365), 2018-05-03
Supplement: Supplementary file 1 [file dataset_Fig1abc.xlsx]

## Sheet: README
	Changes (1990 to 2010) in annual-mean ozone mixing ratios (ppbv) in each model grid cell for two vertical levels (surface and 335 hPa).
	Changes are calculated as 2010land_base minus 1990land_base.
	This file contains data plotted in Figure 1, panels a–c.
	The data are given for each model grid cell: 90 latitude bands (rows) x 144 longitude bands (columns).
	In each tab, the top row indicates the longitude (degrees E) and the first column indicates the latitude (degrees N).
	Each tab contains the data for the indicated vertical level: surface and 335 hPa.
	Units: ppbv

## Sheet: surface
lat (degN) \ lon (degE)	-178.75	-176.25	-173.75	-171.25	-168.75	-166.25	-163.75	-161.25	-158.75	-156.25	-153.75	-151.25	-148.75	-146.25	-143.75	-141.25	-138.75	-136.25	-133.75	-131.25	-128.75	-126.25	-123.75	-121.25	-118.75	-116.25	-113.75	-111.25	-108.75	-106.25	-103.75	-101.25	-98.75	-96.25	-93.75	-91.25	-88.75	-86.25	-83.75	-81.25	-78.75	-76.25	-73.75	-71.25	-68.75	-66.25	-63.75	-61.25	-58.75
-89	0.0921707	0.0921707	0.0921707	0.0921707	0.0921707	0.0921707	0.0921707	0.0921707	0.0921707	0.0921707	0.0921707	0.0921707	0.0921707	0.0921707	0.0921707	0.0921707	0.0921707	0.0921707	0.0921707	0.0921707	0.0921707	0.0921707	0.0921707	0.0921707	0.0921707	0.0921707	0.0921707	0.0921707	0.0921707	0.0921707	0.0921707	0.0921707	0.0921707	0.0921707	0.0921707	0.0921707	0.0921707	0.0921707	0.0921707	0.0921707	0.0921707	0.0921707	0.0921707	0.0921707	0.0921707	0.0921707	0.0921707	0.0921707	0.0921707
-87	0.0890274	0.0878754	0.0906143	0.0853806	0.0835991	0.0816002	0.0833397	0.0868378	0.0903053	0.0923424	0.0918503	0.0880432	0.0905685	0.0895844	0.09021	0.0893669	0.0888405	0.088356	0.0826645	0.063797	0.0775566	0.0786858	0.0803795	0.0805969	0.0812263	0.0796127	0.0827484	0.084713	0.0830803	0.0842323	0.0836067	0.0863533	0.0858574	0.0856934	0.0958138	0.0914421	0.0921249	0.0955963	0.0881844	0.090477	0.0909538	0.090332	0.0995369	0.0962029	0.0981026	0.0984001	0.0962143	0.0970917	0.0997925
-85	0.0861092	0.0738297	0.0832748	0.0787582	0.075531	0.0658188	0.0578308	0.0602303	0.0626335	0.070961	0.0787163	0.0831566	0.0756264	0.068058	0.0660896	0.068325	0.0777931	0.0836067	0.0803261	0.0868797	0.0967407	0.0921516	0.0841103	0.0834923	0.083847	0.0865669	0.0895348	0.0973892	0.0987473	0.0946007	0.0964813	0.0919228	0.0948105	0.106689	0.101307	0.110172	0.126778	0.121162	0.118439	0.120548	0.122116	0.124107	0.124775	0.128201	0.122837	0.122578	0.116032	0.121212	0.124176
-83	0.0696297	0.0707397	0.0699615	0.0599632	0.0617294	0.046463	0.0529861	0.0539703	0.0552521	0.0510063	0.053154	0.0461617	0.0416222	0.0409393	0.0501232	0.0534363	0.05336	0.0576744	0.0440197	0.0451984	0.0407009	0.050333	0.0566177	0.0674877	0.0792046	0.0806122	0.08395	0.0795364	0.0787735	0.0886726	0.0853615	0.075119	0.0894394	0.0796242	0.0849571	0.0880737	0.0680428	0.067379	0.102684	0.109589	0.132481	0.152752	0.145123	0.119648	0.105076	0.102261	0.102959	0.0932999	0.0977249
-81	0.0568657	0.0500278	0.0440254	0.0349941	0.0353241	0.0461311	0.0472851	0.0535488	0.056921	0.0680656	0.0784702	0.0790558	0.0886517	0.0876694	0.0832958	0.0948811	0.103024	0.10355	0.103012	0.102104	0.108109	0.0996151	0.103422	0.0979252	0.0892715	0.0815067	0.0766716	0.0755863	0.0630226	0.0636044	0.0714417	0.0914745	0.0869236	0.0939312	0.0870934	0.088316	0.0729179	0.134226	0.111395	0.115755	0.0727615	0.122128	0.130417	0.136236	0.116653	0.0860786	0.0721111	0.0665283	0.0784969
-79	0.0496731	0.040987	0.0571404	0.0652485	0.068203	0.0680275	0.067791	0.0854301	0.0788612	0.0827866	0.0803833	0.0741806	0.0883789	0.0906582	0.0921898	0.095499	0.122227	0.105881	0.109467	0.110636	0.0659847	0.121696	0.109785	0.0938339	0.0864391	0.0984879	0.0952606	0.100435	0.0852089	0.0821495	0.0841351	0.0902481	0.105923	0.113077	0.11277	0.0979652	0.0984306	0.100323	0.0902805	0.0879669	0.0835953	0.0814209	0.0766182	0.082962	0.0657959	0.0636005	0.0560379	0.0493412	0.0582943
-77	0.0729465	0.0698566	0.0729694	0.0728683	0.0808563	0.0861492	0.0929356	0.0982533	0.0918083	0.0798054	0.0885105	0.0911674	0.0875206	0.0836124	0.0852242	0.0893383	0.0858059	0.0860023	0.109903	0.107862	0.0953293	0.0914383	0.0990601	0.0978909	0.0766106	0.080925	0.0935974	0.0862141	0.0806904	0.0885487	0.0983105	0.0957489	0.0864277	0.0849152	0.0795517	0.0961723	0.0956783	0.0806751	0.0717888	0.0647507	0.071064	0.0757084	0.0703602	0.0737095	0.0714989	0.0703049	0.0611382	0.0807819	0.0727386
-75	0.0954895	0.090765	0.0791988	0.0883675	0.0791874	0.0773067	0.0744877	0.0705662	0.0719986	0.0762825	0.0779648	0.0802402	0.0740891	0.0810165	0.0873299	0.0871277	0.0923958	0.0846863	0.0815887	0.0868549	0.0916195	0.0770645	0.075285	0.0797462	0.0810947	0.0822697	0.0816021	0.0861931	0.0887909	0.0930367	0.0897141	0.0825138	0.078804	0.0818729	0.0722332	0.0783997	0.0819798	0.0781155	0.0878124	0.083744	0.0877991	0.0900002	0.0916767	0.0906849	0.0876026	0.0976257	0.10454	0.0833168	0.0738525
-73	0.0907097	0.0801678	0.0767784	0.0845413	0.0772324	0.0832787	0.0919914	0.079565	0.0613022	0.0632744	0.0670471	0.0669575	0.0616531	0.0690498	0.0709705	0.0720749	0.0577965	0.0649033	0.070467	0.0767994	0.0803223	0.0768394	0.0754261	0.0822239	0.0894661	0.101028	0.10359	0.0936089	0.0854321	0.0881348	0.0892677	0.0858421	0.085865	0.0802822	0.0767632	0.078886	0.0779915	0.0759754	0.0775356	0.0754776	0.0816841	0.0781116	0.085762	0.0871487	0.0851898	0.0923615	0.0954018	0.0956821	0.0771122
-71	0.0782604	0.0660381	0.0850563	0.101351	0.0946083	0.0909634	0.0839577	0.0707684	0.0653515	0.0624943	0.0613041	0.0595207	0.0655823	0.0633564	0.0744114	0.064085	0.0675125	0.0724697	0.0758419	0.0799179	0.0776196	0.0780849	0.0670586	0.0715961	0.0684242	0.0753994	0.0789871	0.0663776	0.0669022	0.0692959	0.077795	0.0818329	0.0780659	0.0707397	0.0679493	0.067955	0.0676708	0.0628223	0.0658512	0.0615044	0.0621262	0.0616112	0.0657387	0.071537	0.0827312	0.07127	0.0928688	0.0734768	0.0731258
-69	0.0628948	0.0647869	0.0608234	0.0658741	0.0677776	0.0669804	0.0614491	0.0630569	0.0669956	0.0714684	0.0612354	0.0589294	0.0639133	0.0635872	0.0641918	0.0609455	0.0515919	0.0612354	0.0742588	0.0735455	0.0908318	0.0844936	0.0802841	0.0761986	0.0670013	0.0619469	0.0582981	0.0714207	0.0639725	0.0686741	0.0752907	0.0706062	0.069931	0.0755348	0.0718651	0.0705051	0.0652866	0.0539989	0.053463	0.0624104	0.0583305	0.051115	0.0620174	0.058218	0.0533581	0.064003	0.0764732	0.0792885	0.0684662
-67	0.0762691	0.063488	0.067646	0.0637417	0.0641918	0.0607548	0.0594902	0.0638599	0.0755157	0.0771084	0.0798225	0.0723152	0.057066	0.0516968	0.0423622	0.0460091	0.0446644	0.0610981	0.0608025	0.0521545	0.0727749	0.0817947	0.0875015	0.0931644	0.0895748	0.0945816	0.090641	0.0799255	0.0652103	0.0671196	0.0763855	0.0810699	0.0781593	0.0706921	0.0791149	0.0797729	0.0722942	0.0640011	0.0571537	0.0511074	0.06213	0.0706177	0.0540218	0.0468636	0.0778599	0.0804157	0.0843124	0.0606937	0.0738468
-65	0.0761795	0.0736027	0.0764942	0.0828896	0.0745926	0.0658245	0.0638542	0.0657768	0.0639954	0.0660744	0.0646305	0.0613117	0.0606537	0.0662556	0.0650024	0.0715942	0.0737267	0.0703869	0.0755386	0.080246	0.074049	0.069767	0.0711098	0.0720577	0.0720577	0.0870304	0.0986652	0.0827637	0.0583477	0.0617714	0.0717411	0.0841045	0.0870571	0.0809803	0.0896378	0.0909595	0.0775394	0.062212	0.0596447	0.0778103	0.0806274	0.0718956	0.0578365	0.0577412	0.0719833	0.0800457	0.0911427	0.0749836	0.0708046
-63	0.0765877	0.0752716	0.0786457	0.0736408	0.0747776	0.0854378	0.0825825	0.0778656	0.0684223	0.0724258	0.0702553	0.0655842	0.0486526	0.0472603	0.0569572	0.0681896	0.0629749	0.0690746	0.0670128	0.0658703	0.0617352	0.0710354	0.0685463	0.0679989	0.0786991	0.0733967	0.0830421	0.0844784	0.0748997	0.079649	0.0889568	0.0977001	0.0912495	0.091629	0.0909882	0.0895805	0.0895748	0.0872135	0.0889149	0.091814	0.0948238	0.0819988	0.077034	0.0790539	0.0872116	0.0794926	0.097723	0.0687313	0.0831356
-61	0.0832596	0.0838642	0.0828991	0.0790596	0.0817318	0.0751438	0.0686493	0.067915	0.0625019	0.0687199	0.0834351	0.0817356	0.0705242	0.0734806	0.073719	0.073349	0.0659904	0.0611916	0.0549583	0.0573845	0.0807323	0.0866337	0.0871239	0.0754833	0.0737534	0.0715847	0.0636005	0.0793953	0.0941887	0.0939713	0.0897484	0.0891323	0.089695	0.0835323	0.0838299	0.0862808	0.079565	0.0780716	0.0776291	0.075386	0.074831	0.0788784	0.0862904	0.0772839	0.0897713	0.074791	0.0726204	0.0609932	0.0654736
-59	0.0888138	0.084177	0.0800781	0.0740376	0.0587139	0.0691891	0.0775299	0.0711632	0.072298	0.0761852	0.0807343	0.0672741	0.0529251	0.0814724	0.075798	0.0726471	0.0892677	0.0932751	0.0850277	0.0894375	0.0852413	0.0771008	0.0718441	0.0673599	0.0709305	0.0714703	0.0824699	0.0874557	0.0880337	0.0884571	0.0825996	0.0832615	0.0792503	0.0909233	0.0913315	0.0983582	0.081604	0.0756378	0.0787621	0.0741425	0.0715427	0.0749645	0.0730572	0.0840282	0.102852	0.0889454	0.0838585	0.0793266	0.0814629
-57	0.0694122	0.08325	0.078413	0.0607643	0.0599499	0.0659695	0.0626965	0.0664959	0.0741196	0.0838432	0.0858612	0.0675068	0.071043	0.0646172	0.0644894	0.0825977	0.0832958	0.0713348	0.0706596	0.0876389	0.0779839	0.0665607	0.0678024	0.0706768	0.0709648	0.0718384	0.0779953	0.082325	0.0834579	0.0793457	0.0794468	0.0798302	0.082159	0.0846596	0.085783	0.0879498	0.0825596	0.0715675	0.0659428	0.0792694	0.0856724	0.0841579	0.0769939	0.0951366	0.0875835	0.0890064	0.0920963	0.0999298	0.103174
-55	0.0804844	0.0890045	0.0904026	0.080061	0.0907898	0.0772591	0.0849285	0.0804005	0.0742874	0.0898781	0.0862961	0.0866661	0.0779476	0.0795898	0.099123	0.0950871	0.0909443	0.0776596	0.0741425	0.0783958	0.0726871	0.071928	0.0741596	0.0711994	0.0715218	0.0756683	0.0834332	0.0771904	0.0705299	0.0789299	0.072237	0.0664864	0.0827808	0.0808086	0.0751038	0.0794983	0.0796471	0.0706997	0.0772247	0.095129	0.0995007	0.0774479	0.0907249	0.0809326	0.0755882	0.086441	0.0867691	0.0769844	0.0801506
-53	0.0698338	0.0811005	0.0942249	0.0981464	0.0967865	0.090847	0.0969124	0.0898838	0.0814514	0.0642128	0.0541153	0.0587254	0.0638905	0.080574	0.081768	0.0737991	0.0658455	0.0748863	0.0777454	0.0751553	0.0821056	0.0803947	0.0807934	0.0787754	0.0759506	0.0683327	0.0816021	0.0835304	0.0789928	0.0822048	0.0763588	0.0710793	0.0841026	0.0793819	0.0823727	0.0821323	0.0764446	0.0969677	0.0993538	0.106596	0.0928993	0.0787907	0.0865059	0.089323	0.0795078	0.083456	0.077858	0.072546	0.0674248
-51	0.0886669	0.095438	0.0959187	0.0837135	0.0726299	0.0741215	0.0744705	0.0792618	0.0743427	0.0792294	0.0840836	0.0905285	0.0851269	0.0804214	0.0859528	0.071064	0.0661869	0.0757217	0.0730381	0.0755959	0.0798397	0.0829639	0.0847931	0.0840549	0.0824394	0.074297	0.0783443	0.0891361	0.0855026	0.0902271	0.0738564	0.0613422	0.0751915	0.07411	0.0775814	0.0843201	0.0934067	0.104673	0.100552	0.10261	0.0865345	0.0987568	0.0651684	0.059166	0.0648861	0.0838814	0.100201	0.0741234	0.0510445
-49	0.0949001	0.0932903	0.094202	0.0769939	0.0696163	0.088522	0.0808411	0.0799599	0.0858078	0.0803528	0.0867519	0.0921078	0.0958862	0.0929565	0.0820274	0.0889091	0.0907879	0.0887508	0.0906715	0.088232	0.0890789	0.0862827	0.0782433	0.0866604	0.0925426	0.0818005	0.0636673	0.0648594	0.0747719	0.0770779	0.0714989	0.0726528	0.0769749	0.0771523	0.0767174	0.078619	0.0855217	0.0961933	0.0730019	0.0803394	0.0973969	0.105139	0.0817738	0.0851383	0.0856934	0.0495377	0.0712643	0.0505714	0.0659943
-47	0.0918617	0.108194	0.0931873	0.0808506	0.0651608	0.08708	0.0756588	0.0779266	0.0885849	0.0813599	0.0849876	0.0886078	0.0953941	0.0921974	0.0906448	0.0836067	0.0839539	0.0912552	0.0839481	0.079134	0.0837803	0.0840244	0.0713844	0.0820312	0.0846081	0.0804863	0.0821514	0.0662327	0.0679016	0.0754738	0.0862484	0.0807228	0.0876045	0.0869541	0.0863762	0.0966244	0.0981922	0.09515	0.0807495	0.09618	0.0990276	0.0708103	0.113768	0.0917473	0.0628471	0.0482426	0.045126	0.0312996	0.0836391
-45	0.080801	0.0934734	0.0930099	0.0754108	0.0710258	0.0865993	0.0855484	0.0864391	0.0830917	0.0821877	0.101475	0.100245	0.0811348	0.0844498	0.0785275	0.0722713	0.0756874	0.0730991	0.0785179	0.0875568	0.0839844	0.0718956	0.0740681	0.105745	0.0942707	0.0964584	0.10182	0.0949535	0.0826416	0.0894794	0.0962143	0.0837994	0.0913754	0.103434	0.102493	0.10347	0.108828	0.109005	0.102203	0.0994625	0.0870285	0.0696621	0.0318909	0.0741882	0.0676479	0.0698128	0.0738735	0.0735683	0.0878544
-43	0.0809135	0.0889988	0.0872841	0.088068	0.0904942	0.0819569	0.0886898	0.0996227	0.0955219	0.0915375	0.103643	0.0770073	0.0834332	0.0880299	0.087471	0.0845299	0.0713348	0.0882034	0.0872707	0.0944309	0.0919399	0.0931473	0.0913315	0.0938797	0.106951	0.0937366	0.0950241	0.0853062	0.0786724	0.071909	0.0931797	0.0867767	0.0909824	0.105465	0.0970707	0.0946064	0.10704	0.0998688	0.100338	0.0951195	0.096611	0.0895195	0.0976143	0.0421333	0.0558262	0.0808887	0.103422	0.0796661	0.0985355
-41	0.0958881	0.0805035	0.0790367	0.0886765	0.0978584	0.0853519	0.0870209	0.0894661	0.0899887	0.106392	0.094305	0.0911655	0.0970612	0.0816727	0.0918751	0.0950127	0.079998	0.085825	0.0865746	0.100021	0.0878124	0.105721	0.0941143	0.105352	0.0962658	0.088398	0.0938778	0.0872211	0.0784016	0.0770988	0.0847912	0.0962753	0.115261	0.105724	0.101954	0.101055	0.107134	0.0996532	0.103191	0.107496	0.111288	0.0997486	0.0793648	0.0841122	0.0987797	0.108919	0.0861893	0.108313	0.124018
-39	0.0952301	0.0846806	0.0856438	0.0935783	0.0906239	0.0897579	0.101469	0.0957394	0.0903149	0.120323	0.111771	0.0985126	0.0725994	0.0932236	0.0969868	0.0874462	0.087759	0.0734711	0.0765743	0.0959015	0.100597	0.117514	0.104643	0.111956	0.119068	0.104551	0.0989342	0.107325	0.101046	0.1008	0.100088	0.0867157	0.0812836	0.102327	0.110298	0.117655	0.0964661	0.0972958	0.106382	0.116898	0.116751	0.0870476	0.0772781	0.086874	0.0388412	0.0704708	0.0819302	0.093523	0.0308838
-37	0.0881348	0.0891685	0.079834	0.110329	0.0934982	0.0938683	0.0948811	0.111437	0.111374	0.120781	0.115471	0.101889	0.0972691	0.0963745	0.0981598	0.104868	0.09795	0.106859	0.101868	0.0882874	0.0923557	0.107622	0.113983	0.120287	0.0983372	0.116457	0.110544	0.104448	0.110209	0.107212	0.111507	0.100994	0.0854759	0.0922451	0.109123	0.122149	0.104687	0.105284	0.111155	0.105906	0.103436	0.0986271	0.0850296	0.143192	0.113201	0.0455532	0.0653687	0.0937271	0.0852642
-35	0.111805	0.100452	0.115194	0.107714	0.106426	0.104437	0.112831	0.105858	0.099247	0.109455	0.12636	0.117844	0.107843	0.129555	0.102797	0.0967503	0.108847	0.112932	0.112665	0.0987434	0.103022	0.105604	0.117771	0.0872612	0.0924263	0.106331	0.108093	0.093401	0.0920219	0.0967503	0.106499	0.100126	0.0834694	0.0801716	0.139273	0.137081	0.119625	0.127218	0.106924	0.0952682	0.105583	0.105753	0.0729637	0.149012	0.098587	0.0333557	0.0937843	0.116421	0.093174
-33	0.116106	0.111568	0.12142	0.109594	0.115248	0.124681	0.128279	0.105844	0.0973816	0.107666	0.123402	0.117273	0.108179	0.11186	0.106436	0.117048	0.120974	0.126343	0.108051	0.109747	0.117208	0.124546	0.125412	0.109392	0.104887	0.118477	0.120314	0.113317	0.122065	0.102365	0.103521	0.112133	0.104765	0.122761	0.134531	0.129545	0.0998535	0.09025	0.113785	0.098896	0.104177	0.0941029	0.0931301	0.102901	0.0991669	0.124046	0.104816	0.121809	0.0543804
-31	0.116608	0.132513	0.125162	0.12863	0.126816	0.128296	0.121422	0.103846	0.103331	0.121412	0.134394	0.109909	0.0914268	0.0974369	0.116802	0.118099	0.11372	0.106314	0.12047	0.125004	0.142275	0.144209	0.12739	0.130596	0.137833	0.130539	0.10644	0.142313	0.143141	0.124468	0.133358	0.131914	0.124842	0.149891	0.12833	0.115662	0.10692	0.101038	0.103193	0.105825	0.104218	0.103216	0.103516	0.14019	0.135715	0.175316	0.0961704	0.12693	0.10903
-29	0.118006	0.122395	0.129978	0.117933	0.119175	0.144709	0.143879	0.114468	0.113838	0.119177	0.140741	0.122431	0.0924206	0.113474	0.108721	0.130709	0.136375	0.127199	0.125069	0.129816	0.121572	0.137884	0.145754	0.144598	0.161568	0.167025	0.128447	0.132662	0.135695	0.126539	0.13994	0.139246	0.132486	0.133608	0.123581	0.132647	0.141796	0.139332	0.113073	0.10968	0.108881	0.122746	0.0972271	0.129759	0.235119	0.203339	0.140694	0.0963764	0.067955
-27	0.140366	0.138834	0.123953	0.109085	0.12077	0.140959	0.137949	0.117559	0.122013	0.117832	0.149986	0.137905	0.131378	0.138485	0.154213	0.139603	0.115459	0.126066	0.14048	0.156342	0.130939	0.151054	0.136496	0.145742	0.15099	0.145403	0.133785	0.125599	0.140306	0.113382	0.137165	0.147867	0.129848	0.132248	0.14377	0.140207	0.13352	0.145082	0.108036	0.111818	0.121473	0.10994	0.119295	0.154778	0.301502	0.25362	0.132332	0.0705814	0.0978775
-25	0.126589	0.14864	0.128206	0.136299	0.147989	0.140501	0.143391	0.148344	0.1504	0.181299	0.19758	0.154177	0.146982	0.145563	0.1586	0.1488	0.120604	0.147402	0.146635	0.156805	0.16647	0.160759	0.170401	0.169598	0.158562	0.136726	0.138247	0.116592	0.132294	0.128735	0.139362	0.129343	0.13302	0.136751	0.126654	0.108341	0.124342	0.130289	0.129559	0.115438	0.122885	0.106508	0.154146	0.365749	0.284252	0.261421	0.152918	0.0799713	0.078516
-23	0.154959	0.148743	0.13913	0.135386	0.155558	0.148544	0.167835	0.154671	0.16622	0.196693	0.201029	0.179466	0.18428	0.182877	0.182049	0.169632	0.141163	0.163088	0.159176	0.170547	0.166224	0.164259	0.152077	0.161196	0.162552	0.151464	0.158838	0.160551	0.150654	0.1451	0.156784	0.113411	0.118944	0.134033	0.12475	0.121273	0.109596	0.126842	0.11603	0.129116	0.128904	0.0944729	0.169182	0.198589	0.224209	0.234379	0.0547142	0.101877	0.0833511
-21	0.182867	0.153278	0.156006	0.168821	0.171543	0.175426	0.158039	0.155167	0.158239	0.175831	0.171045	0.186049	0.196417	0.210669	0.176388	0.174309	0.185713	0.170778	0.17424	0.183878	0.18166	0.168325	0.163338	0.173447	0.185003	0.170868	0.163904	0.146856	0.126867	0.134312	0.162262	0.141249	0.140646	0.148514	0.128767	0.101978	0.111633	0.121185	0.135979	0.154615	0.117184	0.116594	0.170774	0.191257	0.216255	0.19268	0.117216	0.0557137	0.076685
-19	0.20767	0.181036	0.187771	0.198673	0.211555	0.198038	0.180185	0.170944	0.196114	0.194767	0.194021	0.205948	0.214895	0.200911	0.158487	0.185234	0.196737	0.184399	0.179672	0.165857	0.172329	0.173788	0.168793	0.173405	0.182035	0.173857	0.169987	0.160994	0.143698	0.149572	0.148685	0.158327	0.164053	0.134964	0.1231	0.128416	0.120073	0.1285	0.154448	0.139528	0.109556	0.0916843	0.113323	0.163422	0.147537	0.145306	0.105846	0.0154171	0.0274792
-17	0.21073	0.214819	0.218018	0.228304	0.211832	0.203264	0.193649	0.175875	0.182453	0.19458	0.217262	0.208673	0.20845	0.203051	0.183678	0.190258	0.199715	0.200937	0.172899	0.159149	0.173664	0.165226	0.171764	0.161276	0.149763	0.157696	0.177708	0.156563	0.150885	0.164158	0.165682	0.155407	0.140888	0.157547	0.151258	0.115587	0.0990715	0.11834	0.124277	0.123081	0.0488491	0.0615864	0.110405	0.0869827	0.09935	0.0322189	0.0696802	-0.0625381	0.0921745
-15	0.208958	0.223669	0.253622	0.253027	0.215736	0.208254	0.216312	0.2041	0.203766	0.201889	0.196041	0.207315	0.20756	0.196812	0.206356	0.191761	0.173998	0.173557	0.18354	0.171785	0.173037	0.177822	0.174055	0.16437	0.159801	0.164392	0.16993	0.168018	0.153791	0.140133	0.143082	0.149378	0.166132	0.150749	0.118523	0.112448	0.128975	0.120878	0.130367	0.0790977	0.0749588	0.0967731	0.127335	0.0880318	0.0617199	0.0555124	-0.00751305	-0.158078	0.116869
-13	0.243433	0.236656	0.248962	0.245371	0.235353	0.250643	0.225693	0.218243	0.205013	0.180969	0.162714	0.167645	0.178989	0.180737	0.170206	0.177309	0.172894	0.177906	0.188938	0.197691	0.176043	0.161247	0.182043	0.190037	0.197948	0.19162	0.178986	0.168892	0.153587	0.148235	0.140757	0.153452	0.14259	0.118071	0.12019	0.137888	0.148153	0.139494	0.102354	0.102757	0.0579357	0.0575027	0.0524368	0.00315857	0.105392	0.000781059	-0.054328	-0.152606	0.0269175
-11	0.234118	0.22159	0.23161	0.241871	0.218183	0.214674	0.219976	0.190941	0.200438	0.186586	0.182356	0.161827	0.163393	0.15678	0.164082	0.149975	0.152496	0.157101	0.179321	0.183847	0.175507	0.185125	0.190371	0.18388	0.179413	0.175001	0.169241	0.158417	0.158104	0.15859	0.142807	0.133808	0.117546	0.127018	0.132608	0.14492	0.144627	0.128168	0.116327	0.0332661	-0.363838	0.0307751	0.0521994	0.0512934	0.135688	0.0540667	0.0336542	-0.0738487	0.0603466
-9	0.201802	0.160981	0.169271	0.185541	0.186001	0.168344	0.173491	0.204613	0.189048	0.189667	0.184385	0.159666	0.166317	0.157623	0.147846	0.144979	0.149984	0.162712	0.169853	0.176954	0.173	0.1705	0.178406	0.174784	0.158813	0.171696	0.166792	0.168081	0.167606	0.158705	0.143339	0.13031	0.140558	0.126511	0.131693	0.154501	0.135553	0.12516	0.117041	-0.104233	0.058279	0.0564327	0.210043	0.125304	0.0698795	0.0475006	0.0332241	0.0171194	0.0516529
-7	0.165902	0.154676	0.137629	0.138454	0.135801	0.138601	0.143666	0.144939	0.154173	0.140532	0.13385	0.12714	0.11581	0.118088	0.14286	0.14183	0.131395	0.145636	0.161932	0.150858	0.159836	0.161234	0.161831	0.14793	0.166063	0.163988	0.16433	0.154221	0.134207	0.128462	0.121618	0.150963	0.136684	0.119671	0.142639	0.154305	0.108511	0.0645828	0.0112	-0.0374298	0.0596046	-0.0176287	0.190892	-0.0114975	-0.0107536	-0.0291653	-0.00147343	0.0469246	0.0036726
-5	0.173944	0.146721	0.14924	0.15313	0.123568	0.110565	0.124312	0.137339	0.140691	0.130504	0.110862	0.124644	0.136189	0.138013	0.142036	0.14303	0.13612	0.141481	0.131853	0.135607	0.134357	0.129559	0.131987	0.134285	0.116787	0.128361	0.13442	0.109852	0.100647	0.106476	0.137306	0.113724	0.113134	0.139091	0.148344	0.115297	0.0697823	0.0376167	0.00131989	0.0315056	0.0140018	0.00291824	-0.0384979	-0.0158801	0.006073	0.0180707	0.0172491	0.0475883	0.0274134
-3	0.12647	0.117196	0.10078	0.102674	0.0983248	0.112002	0.0987024	0.0969725	0.0952682	0.0912008	0.0927315	0.0903492	0.0925522	0.0884857	0.110414	0.116852	0.116746	0.121058	0.117281	0.110331	0.120352	0.133385	0.121178	0.100031	0.0938778	0.106396	0.102371	0.0965061	0.113924	0.11338	0.104031	0.1075	0.0960541	0.108746	0.101944	0.083765	0.0989838	0.073719	0.015646	0.0267391	0.00988197	0.0389495	0.0293646	0.025167	0.100737	0.0829067	0.019083	0.0506916	0.0849667
-1	0.105704	0.101074	0.0879488	0.101932	0.0937004	0.0928478	0.0823174	0.0749063	0.0799093	0.0714378	0.0642176	0.0701275	0.0782681	0.0753613	0.0769167	0.100093	0.105926	0.0898857	0.0792351	0.0756588	0.0819626	0.0903378	0.0871639	0.0811863	0.0913944	0.0905724	0.0860958	0.113825	0.103657	0.0801392	0.0940838	0.107649	0.0981388	0.0998516	0.0700073	0.103405	0.0870419	0.068655	-0.00403214	0.0385456	0.0338001	0.0530467	0.00374508	0.022594	0.0360637	0.0321045	0.0704556	0.103235	0.0434361
1	0.0963469	0.0922852	0.0837593	0.0903893	0.071044	0.0764303	0.0820951	0.0731287	0.0739126	0.0664549	0.0631647	0.0723677	0.0651569	0.0757408	0.0895386	0.0805054	0.0788927	0.0728235	0.0806131	0.0854092	0.0830021	0.0758095	0.0801382	0.0784245	0.0741711	0.0781116	0.0707054	0.0801296	0.0519352	0.0800896	0.0877934	0.0756397	0.0681305	0.0710545	0.0792274	0.106226	0.0460968	0.0395222	0.00775528	0.0493946	0.0351963	0.0316458	-0.0369081	0.000648975	0.0858884	0.0088048	-0.0180674	0.0638781	0.00376701
3	0.0961494	0.0911102	0.0846024	0.082778	0.0881596	0.089653	0.0916634	0.103796	0.0988407	0.0931711	0.0934935	0.0879049	0.0741491	0.0653028	0.0604048	0.0812483	0.0830679	0.0834227	0.0945244	0.0815153	0.0879955	0.0894251	0.0732117	0.0755243	0.0955067	0.0487747	0.0126305	0.0755539	0.0575943	0.0665302	0.0437088	0.0409451	0.0727501	0.065403	0.117165	0.097086	0.0588188	0.0531006	0.030859	0.0610104	0.041748	0.075058	-0.0489311	-0.10905	0.0738139	0.05408	0.0381212	0.0143633	-0.0740528
5	0.10026	0.0879288	0.0833702	0.0868673	0.0925407	0.101263	0.105286	0.114265	0.109116	0.106324	0.10972	0.118598	0.106451	0.113157	0.113894	0.111351	0.131308	0.113482	0.0819387	0.102062	0.100428	0.105379	0.09655	0.0973854	0.101734	0.0533428	0.00715256	0.0732174	0.118256	0.0595226	0.10598	0.139252	0.0823898	0.0220089	0.0608711	0.0597878	0.0535183	0.0866318	0.0899525	0.0480595	0.0393162	0.0113783	0.0248966	-0.00179863	0.0213566	0.00714207	-0.0194569	0.0763226	0.0433178
7	0.126043	0.124189	0.114614	0.0964489	0.111309	0.122349	0.121883	0.113586	0.115168	0.112997	0.0942535	0.119675	0.123362	0.119465	0.129988	0.134272	0.145922	0.11198	0.122107	0.143179	0.134708	0.118015	0.109997	0.121649	0.099369	0.0552883	0.0475845	0.0753937	0.0805416	0.0665665	0.06353	0.081707	0.13969	0.108496	0.0231285	0.0683327	0.0624027	0.0797806	0.083683	0.0765762	0.0687733	-0.0190935	-0.0583229	0.0231342	0.0369453	0.0635138	0.0356979	0.0115023	0.0510178
9	0.132328	0.116219	0.112389	0.107605	0.118151	0.128511	0.12289	0.125307	0.110752	0.109768	0.123306	0.128609	0.110451	0.0608654	0.101883	0.101501	0.104818	0.112537	0.0974941	0.108236	0.0963745	0.111013	0.0895119	0.0909061	0.09268	0.0946636	0.102369	0.0936241	0.140184	0.0457306	0.0683861	0.105309	0.0962772	0.0600548	0.0787487	0.0548	0.0729256	0.052433	0.0788097	0.0544548	0.0638866	0.0583897	0.0690727	0.0345898	0.0696869	0.0297508	0.0474033	0.0639362	0.0956802
11	0.126997	0.117609	0.103882	0.102322	0.110842	0.115225	0.115091	0.127234	0.125429	0.109406	0.107323	0.101181	0.090168	0.0824757	0.0697651	0.0934219	0.0912323	0.0821209	0.10108	0.130272	0.116241	0.127584	0.1085	0.117165	0.114347	0.0698757	0.035984	0.0519905	0.1031	0.1007	0.0692482	0.10153	0.0747795	0.0712433	0.0898285	0.100746	0.0558262	0.07897	0.0941868	0.0793076	0.0915565	0.093605	0.0334415	0.0529251	0.100323	0.0900955	0.0920258	0.0996799	0.106699
13	0.134232	0.126345	0.122709	0.115568	0.118444	0.118706	0.111464	0.104088	0.11273	0.124315	0.122276	0.100904	0.108599	0.0904293	0.0855656	0.0800247	0.099123	0.0959663	0.0903721	0.0954895	0.0968971	0.0905342	0.100233	0.0953102	0.0674477	0.0770416	0.0712013	0.098259	0.0586967	0.0965214	0.0717049	0.0779209	0.119724	0.121956	0.124359	0.060585	0.0186749	0.0653725	0.0525322	0.0827103	0.0825729	0.0851288	0.0648251	0.0855179	0.101227	0.107216	0.119947	0.127893	0.110956
15	0.124475	0.119921	0.119005	0.135309	0.124487	0.111134	0.106094	0.105673	0.0956059	0.0969105	0.101074	0.121357	0.122463	0.111492	0.0834007	0.0632668	0.0820656	0.112328	0.122768	0.0832253	0.0735703	0.0732651	0.0943222	0.111374	0.105251	0.0969696	0.097435	0.0902977	0.112354	0.0716629	0.0592804	0.078743	0.129704	0.0660057	0.0754871	0.0656033	0.0646572	-0.00257492	0.0321407	0.0787086	0.0896797	0.0936966	0.0904617	0.0888462	0.0904713	0.0967846	0.11824	0.110502	0.0960636
17	0.110184	0.0962048	0.0940952	0.123657	0.117722	0.0974083	0.0779266	0.110054	0.119045	0.0956039	0.105484	0.114258	0.116066	0.109512	0.0979958	0.0676231	0.0742455	0.0986176	0.091671	0.0895271	0.0842667	0.0807076	0.0618019	0.0513687	0.0822449	0.0869179	0.0841446	0.072506	0.0889359	0.0808258	0.0826111	0.0991096	0.11994	0.0775242	0.048708	0.0696926	0.0960464	0.100651	0.0852242	0.081337	0.0907593	0.0807343	0.0819626	0.0774689	0.0915985	0.0903454	0.0864792	0.103237	0.0895119
19	0.101101	0.0965748	0.0707207	0.0676842	0.0978432	0.0741653	0.0713997	0.0855827	0.102276	0.114258	0.120701	0.129047	0.10099	0.0799522	0.094635	0.0951157	0.0769157	0.0781975	0.0778122	0.0694237	0.063858	0.060627	0.0472412	0.0689125	0.0593109	0.0710754	0.0795822	0.080452	0.0725136	0.100067	0.0396824	0.0384655	0.0229301	0.134701	0.0719948	0.0390511	0.0250206	0.0867081	0.0921936	0.0779152	0.0720558	0.0770187	0.0843391	0.0346031	0.0798035	0.112728	0.0915489	0.0935707	0.109188
21	0.0979462	0.100597	0.0995636	0.0681686	0.082386	0.0931549	0.0882874	0.0991096	0.110073	0.104748	0.111351	0.0913887	0.089119	0.0984306	0.0893555	0.0803185	0.0802383	0.0783997	0.0581245	0.0645027	0.0638008	0.0224762	0.0405655	0.0819702	0.0565872	0.0499268	0.0528069	0.0289803	0.0419388	0.0496941	0.049696	0.0861969	0.177471	0.0840683	0.0304947	0.0276031	-0.00782394	0.0824051	0.0809669	0.0789375	0.0624313	0.0805855	0.0739059	0.0895271	0.0924911	0.0868034	0.0926056	0.0978661	0.0892181
23	0.106224	0.0937462	0.0913811	0.108852	0.0982933	0.0958138	0.0971336	0.09935	0.103546	0.118221	0.106155	0.0906296	0.0866013	0.107719	0.107098	0.0882912	0.0606117	0.0803528	0.0700722	0.0573616	0.0695267	0.0502052	0.0335312	0.0608444	0.0711823	0.0703545	0.0578461	0.0388908	0.060791	0.037056	0.0502472	0.0441589	0.0721874	0.0164604	0.0365028	0.0380058	0.0628891	0.0783234	0.0617485	0.0624313	0.0858574	0.0720367	0.0883904	0.079216	0.0770683	0.0767365	0.0961571	0.0882607	0.0981865
25	0.0856667	0.0847092	0.0772209	0.0856934	0.0724792	0.0774193	0.0810051	0.0835648	0.100445	0.0670433	0.0565109	0.0580559	0.082634	0.0765114	0.0974884	0.0828819	0.0604668	0.0807152	0.0805283	0.0720825	0.0578461	0.0412216	0.0539284	0.0205193	0.0858498	0.0498734	0.0800018	0.0526581	0.00637054	0.0439911	0.109646	0.0904655	0.0394478	0.041111	0.0363083	0.0622444	0.0689354	0.0740433	0.0640411	0.0654144	0.0589447	0.0477867	0.0761757	0.0775223	0.0883713	0.0824509	0.0994072	0.0983925	0.0727463
27	0.0789337	0.0880623	0.0634804	0.0619316	0.0928307	0.0570068	0.0607376	0.091053	0.0873909	0.0672379	0.071907	0.0659485	0.0810242	0.0770798	0.0784836	0.0869255	0.095108	0.102116	0.10387	0.0873528	0.0351334	0.0182114	0.0242157	0.04459	0.047924	0.0207825	0.0316086	0.082077	-0.0298252	0.0471191	0.00872421	0.030056	0.067894	0.0421944	0.0354919	0.0328217	0.0449486	0.0679626	0.0760384	0.0745049	0.0580673	0.0709	0.0749741	0.0567474	0.0646858	0.051506	0.0604362	0.0858498	0.0687599
29	0.0901413	0.0874367	0.0861397	0.0931473	0.087738	0.0831947	0.067112	0.0633545	0.0667458	0.0691833	0.0797386	0.0866585	0.0781898	0.0797653	0.0771065	0.0647392	0.0709724	0.0780754	0.0884018	0.0747795	0.0531006	0.0547142	0.0501556	0.0503349	0.0246429	0.00697708	0.0324554	0.0727348	0.0742264	0.0630608	0.0869064	0.00674438	0.0680313	0.00827026	0.029213	0.00992966	0.0583649	0.054512	0.0218735	0.105453	0.078598	0.0825691	0.100224	0.0806122	0.0760841	0.0718765	0.054039	0.0659485	0.0521622
31	0.065731	0.0739861	0.0779877	0.0953255	0.0990143	0.0816917	0.070549	0.0573196	0.0675163	0.0940895	0.0888481	0.0725784	0.0714188	0.0577927	0.0610466	0.0535431	0.0555153	0.0595322	0.0639839	0.0564308	0.053009	0.0605507	0.0671501	0.022995	0.0138474	0.0375862	0.0462494	0.0406723	0.0669594	0.0683899	0.133236	0.0200157	0.0394058	-6.86646e-05	0.056675	-0.0258827	0.0683365	0.0586014	-0.0185127	0.0279121	0.0886879	0.0721931	0.0876694	0.0831718	0.0610046	0.0524902	0.0469322	0.0288963	0.0429688
33	0.0761642	0.0703201	0.0655823	0.0720482	0.089386	0.0824432	0.0806808	0.0678444	0.0585327	0.0627136	0.0804863	0.077137	0.0581589	0.0591202	0.0538788	0.0508614	0.0486679	0.0762329	0.0678787	0.053463	0.0546951	0.0563622	0.0380745	0.0339622	0.0796318	0.0183716	0.023983	0.0149231	0.108833	0.0376587	0.13258	0.047596	0.0499268	0.0119591	-0.00209045	-0.0678139	-0.0200043	0.0714302	0.0342636	0.0515137	-0.0175362	0.0271606	0.0569344	0.0664291	0.0452614	0.0481796	0.0797577	0.0618858	0.0644684
35	0.0659676	0.0669975	0.0546341	0.0602379	0.0648956	0.0758057	0.0719032	0.0553741	0.043457	0.0657959	0.0821648	0.0644035	0.0634575	0.0407066	0.0356026	0.0403709	0.0508347	0.0515938	0.0699463	0.0611	0.048214	0.0576439	0.0335693	0.0294495	-0.0120697	0.0385513	0.0315514	0.091156	0.115898	0.0123901	0.0731888	0.0756798	0.0220566	0.105263	0.156334	-0.0379715	-0.00757599	0.0317688	-0.0538979	-0.175274	-0.0144806	0.0395699	0.000797272	0.0289268	0.0596695	0.0608139	0.0661812	0.0541611	0.0472107
37	0.0489349	0.0519257	0.0734863	0.0663071	0.0479927	0.0595207	0.0714645	0.0412254	0.0452156	0.053894	0.0579834	0.052536	0.0357895	0.0324402	0.0318604	0.0493393	0.0486298	0.0545921	0.0568466	0.061924	0.068676	0.0377808	0.0294609	0.0466423	0.0794411	0.138138	0.100327	0.124249	0.0237236	0.0369759	0.104107	0.0869331	0.0150146	0.00762939	0.164551	0.0368881	0.048027	-0.0234108	0.00399017	0.0258789	-0.137798	-0.0344887	-0.0269279	0.00440979	0.0216789	0.039753	0.047821	0.0313225	0.0511589
39	0.0409698	0.0477257	0.0556488	0.0707283	0.0630608	0.0477829	0.0662918	0.0685768	0.0516396	0.0426712	0.0330429	0.0311089	0.0394287	0.0446968	0.0416183	0.039608	0.0513763	0.0532227	0.0546074	0.0596771	0.0663986	0.0448112	0.0346336	0.0156708	0.0587845	0.0816689	0.137463	0.110882	0.00108719	0.0659332	0.0376167	0.00641251	0.048996	0.0974655	0.041954	0.083828	-0.0155449	0.000244141	-0.0125122	0.0799141	-0.00191116	-0.0642281	0.040863	-0.0401611	0.027153	0.0408096	0.0349083	0.0340004	0.0424423
41	0.0528297	0.0511436	0.0578461	0.0420113	0.0512009	0.0570145	0.050766	0.0699196	0.0660057	0.0574722	0.0621529	0.0276756	0.0497932	0.0565987	0.0531006	0.0464935	0.0522079	0.0595474	0.0496292	0.0548668	0.0667953	0.0532112	0.0607529	0.0273132	-0.0728798	0.0276909	0.0697212	0.0875626	0.0308151	0.0484962	0.0640564	0.0799637	0.0747986	0.0228615	-0.0392685	0.0431213	0.1017	-0.0045166	-0.000408173	-0.102509	0.00123978	-0.0221062	-0.000297546	-0.0167961	0.025486	-0.00753403	0.0174484	0.0273438	0.0526161
43	0.0531921	0.0536957	0.0457993	0.0360107	0.0493965	0.0538673	0.0594482	0.0578194	0.0596466	0.0452766	0.0622749	0.0407295	0.0432243	0.0440216	0.0376015	0.0663147	0.0450974	0.0550232	0.0491791	0.0438423	0.0520592	0.0664406	0.0359268	0.0450668	0.00728226	0.0537376	0.0782852	0.0105476	0.00580215	-0.00662994	0.00733948	0.0651627	-0.0109406	0.141418	0.000427246	0.0490685	0.11071	0.0706978	0.000530243	0.00489807	0.034317	0.084446	-0.0175514	0.0246162	0.0614281	0.122261	0.086937	-0.00406265	0.0433159
45	0.0757751	0.0645638	0.0490494	0.0323143	0.0489082	0.0461884	0.0543289	0.0450439	0.0476112	0.0385399	0.0285492	0.0181351	0.0370903	0.0339317	0.0232582	0.0254288	0.0381851	0.0573616	0.0617256	0.0710831	0.0491905	0.0462837	0.0449219	0.0757065	0.0461082	0.0440216	0.0538979	0.061161	0.0395164	0.0385437	0.0353317	0.0449219	0.0692711	0.0226555	-0.069603	-0.0662689	0.0330772	0.0347023	0.00931931	-0.012989	-0.00342941	-0.0752068	-0.020916	0.00576019	-0.0363312	0.0600395	0.0695038	0.0635834	0.0957413
47	0.0412292	0.0551071	0.0451431	0.045166	0.0351601	0.0401497	0.0372276	0.0420914	0.0591049	0.049427	0.0255966	0.020134	0.0295639	0.0147552	0.0203705	0.0224266	0.0343018	0.0637131	0.0782814	0.0772247	0.0688782	0.0256386	0.0686836	0.0571671	-0.0239601	0.0813599	0.0200386	0.0996857	0.0196114	-0.0117378	-0.0255547	0.0320091	0.0693321	-0.00700378	0.0236702	-0.00879669	0.0446167	0.0463257	0.0550957	0.0063324	-0.0517044	-0.0179977	-0.00976944	-0.00391006	0.0212898	0.0410004	0.0492554	-0.00100708	0.114956
49	0.0552483	0.0479851	0.0919952	0.0543633	0.0274696	0.0383453	0.02948	0.0448227	0.0398483	0.0458946	0.0369873	0.0415382	0.0223923	0.0201454	0.0200996	-0.00283432	0.0198021	0.0470543	0.0755081	0.0841675	0.0722771	0.0713882	0.0533447	0.0408707	0.0176888	0.0182877	0.0814896	0.0100784	0.0137672	0.0694733	0.0938835	0.106297	0.099472	-0.0613403	-0.0254898	-0.0188217	0.0284309	0.0865555	0.0649376	0.00330353	0.00222778	0.0281067	-0.0241661	0.0129852	0.0107498	0.0220642	0.00366974	-0.00844193	0.0281754
51	0.0821571	0.0944252	0.0928383	0.0613365	0.0698471	0.066761	0.0557671	0.0552025	0.0457077	0.0379829	0.043644	0.0627556	0.0308456	0.009655	0.00122452	0.00282669	0.0132828	0.0371437	0.056591	0.0452881	0.0314484	0.080101	0.0257034	0.0284233	0.0030632	0.047245	0.0673294	9.91821e-05	0.0530357	0.0333786	-0.0398254	0.0195274	0.0893326	0.0585403	-0.00562286	0.00794601	0.00102997	0.00431824	0.0245628	-0.0103493	0.00640488	0.0162163	0.0128212	0.052124	0.00978851	0.00392532	0.0550537	0.0283661	0.022316
53	0.0916634	0.0752029	0.0327263	0.0543556	0.0522575	0.0903702	0.0802574	0.064045	0.0957527	-0.00191116	-0.0167274	0.0395432	0.0131874	-0.00926971	0.0466385	0.0457306	0.0279846	0.0289383	0.0118523	0.0114975	0.0168686	0.0468178	-0.0309029	0.0072937	0.0373802	0.0310631	0.0976105	-0.0798035	0.0119362	-0.00392151	-0.0304527	0.00365067	0.0313835	0.0319901	0.0102425	0.000301361	-0.00888062	0.000671387	0.0713959	0.0670662	0.032177	0.0381165	0.0372963	0.0398064	0.0144501	-0.0197144	0.01297	0.024498	0.0299797
55	0.0367813	0.042366	0.0640106	0.0293503	0.0215912	0.0723763	0.145855	0.0521927	0.0634537	0.0303612	0.00737762	-0.0187531	-0.0501747	-0.0279236	0.0304985	0.020771	0.0563469	0.0591965	0.0473328	0.0588112	-0.0362892	-0.00320435	0.0119934	0.0166168	-0.0146103	0.0261917	0.0269928	0.00901794	0.00641251	0.0146713	0.0258408	0.0110359	0.00959778	0.0159073	0.0267715	0.0207176	0.0037384	0.0149765	0.0381813	0.0429382	0.0410004	0.067482	0.0541115	0.0109901	0.00254059	0.0645409	0.0382195	0.0209351	0.0359383
57	0.00305557	0.0423889	0.0221138	0.0476723	0.0338211	0.0279694	0.127033	0.0748711	0.0281258	0.00522614	0.0444756	0.0262299	0.0198669	-0.0170822	0.00249481	-0.00223541	0.053936	0.0691376	0.071022	0.0576401	0.0243683	0.0130043	0.0559006	0.0506401	0.0411339	0.0813599	0.0526085	-0.0431366	-0.0525436	-0.000354767	-0.00717163	0.0187035	0.0433044	0.08741	0.0445709	0.0362244	0.0594292	0.0661888	0.0209656	0.00357819	0.0176086	0.0423737	0.0278473	0.061615	0.0367813	0.0279808	-0.00653076	0.0812492	0.0514641
59	0.0707436	0.0827332	0.0654221	0.111313	0.0880585	0.0614891	0.056366	0.0246429	0.0270233	0.000980377	-0.0266228	-0.00369644	0.025383	0.054821	0.0216522	-0.0114326	-0.00314713	-0.0221863	0.0213432	-0.000598907	0.0187988	0.00827789	0.0969353	0.0413284	0.0489273	0.0687103	0.070446	0.00344467	-0.0373116	-0.0400963	0.0339317	-0.00585175	0.0750008	0.08498	0.0741997	0.0482597	0.00965881	-0.0360222	-0.00642395	0.0151672	0.0272713	0.0652466	0.00714874	0.00923157	0.0183601	0.00908661	0.000606537	0.0662117	0.0308571
61	0.0755272	0.0389481	-0.015007	0.0480156	0.0508308	0.041153	0.0420952	0.0498428	0.0497398	0.00718307	0.0164642	-0.0330086	0.0557137	0.0225067	0.0810966	0.063343	0.0491943	0.0775528	-0.000137329	-0.0196419	-0.0164833	0.0461159	0.045845	0.012825	0.0421867	0.0372353	0.0765877	0.0448456	-0.00830078	-0.00319672	0.000141144	0.0608406	0.0126076	0.00429535	0.0271225	0.0171967	0.0415077	0.00162506	-0.0428276	-0.0408249	0.0184784	0.0661087	0.0557175	0.0672779	0.125809	0.0203438	0.0326004	0.0421791	0.0357475
63	0.0395546	-0.0367584	-0.0542145	-0.00511551	0.0145149	0.0240288	0.0736618	0.047039	0.0260773	0.032711	0.0139961	0.0733376	0.00456619	-0.00699615	0.0201454	0.029808	0.0551491	0.130653	0.0935555	0.0076828	0.104279	0.0256538	0.0161972	0.0375557	0.0207253	0.00610352	0.0602074	0.0358315	0.0192642	0.00344086	0.0447197	0.0397606	0.0141487	0.00754929	0.0207558	0.0228081	0.0320778	-0.0019722	-0.00215149	0.000984192	0.000808716	0.0256882	0.0634727	0.0513954	-0.00200272	0.0439949	-0.0274925	0.042141	0.0416451
65	0.0399323	-0.0103951	0.0273438	-0.0219383	0.0130882	0.0492172	0.0199165	-0.00647736	0.0459251	0.0345802	0.0412254	0.0544548	0.036293	0.0731812	0.0715599	0.0867081	0.122677	0.124626	0.0792198	0.0652428	0.0569077	0.033165	-0.0192947	0.044014	0.0700073	0.0316505	0.035141	0.024044	0.0541573	0.0233803	0.000595093	0.0265541	0.0106544	0.0693817	0.045723	0.0313568	-0.0171547	0.00558853	0.00134087	0.0955505	0.0799026	0.0182762	0.0295181	0.033165	0.040287	0.0354118	0.0205803	0.0372543	0.106853
67	0.0259476	0.0512238	0.023407	0.0120811	0.063076	0.101101	0.102551	0.0582657	0.0416794	-0.0102577	0.0593185	0.0812569	0.042717	0.0913086	0.0420761	0.0164223	0.0347214	0.0289993	-0.0382423	0.0318756	0.0206146	0.0524406	0.0277214	0.0831184	0.0829391	0.0608292	0.0332909	0.00458527	0.0371246	0.0311852	0.0190163	-0.0124016	0.0169601	0.0902557	0.0808716	0.0255356	0.0311584	0.00471878	0.0246239	0.017765	0.00275421	0.0367432	0.00376892	0.0182533	0.0307617	0.0055275	0.105431	0.0294151	0.0483742
69	0.0200882	0.0572205	0.0621758	0.0800133	0.0143127	0.0613022	0.0860023	0.081768	0.0377922	0.0374718	0.00257492	0.0383377	-0.00457382	0.045929	0.00337219	0.0140533	0.00642014	0.0480461	0.0085144	0.0503273	0.0279922	0.0291138	0.00522614	0.0170288	0.0799904	0.0274544	0.0196381	0.0691414	0.046257	0.0314941	0.0255547	-0.00770569	0.0287971	0.0910034	0.0694427	0.0817108	0.0476112	0.0357056	-0.027359	-0.012085	0.0201073	0.0357666	0.0138626	0.0433388	0.0842323	0.0722885	0.0715218	0.0322762	0.0228996
71	0.0182991	0.0392342	0.084919	0.0743217	0.0667725	0.0740356	0.0821724	0.0377159	0.00676727	0.0112686	-0.00643158	-0.0115891	-0.0176697	-0.00634384	0.00666809	0.0252495	0.0512466	0.0625725	0.0707703	0.0779228	0.0940018	0.0649986	0.0300179	0.0212479	0.0273018	0.00366592	0.0160637	0.0369606	0.0558243	0.0574226	0.0177879	0.0220833	0.0326805	0.0203362	-0.0509987	-0.0477753	0.0316582	0.0551414	0.034832	0.0152969	0.0290337	-0.0283432	0.0110512	-0.015976	-0.0214157	-0.037117	-0.0460777	0.00725174	0.0185814
73	0.0426178	0.0545082	0.0668716	0.0528336	0.0494499	0.0780754	0.0671921	0.0431099	0.0140533	0.0168457	-0.0296326	-0.0494118	-0.033699	0.00613022	0.00939178	0.0354424	0.022644	0.0468941	0.0361748	0.0644798	0.0779266	0.0774956	0.10936	0.113567	0.030323	0.0288086	0.0179482	-0.0222549	-0.00185013	0.0479736	0.0934181	0.0132332	0.0239716	0.0439568	0.0151825	0.0250282	0.0233231	0.0185928	0.0368767	0.0250397	0.0267601	0.0438309	-0.0354652	-0.0520058	-0.0436783	-0.0651245	-0.0696907	-0.0179253	0.0108986
75	0.0443573	0.0529099	0.0506439	0.0662575	0.0411911	0.0378075	-0.00174713	0.0122299	-0.0203819	-0.047718	-0.021965	0.000858307	0.0266762	0.00987625	0.00958633	-0.0396194	0.00418472	0.0116806	-0.0115948	0.00069809	0.0444298	0.0373344	0.0248833	0.0353203	0.0379753	0.0406189	0.0698547	-0.00384521	0.0122185	0.0389023	0.0683136	0.034893	0.0212326	0.0179825	0.0383644	0.0155869	0.0159531	0.0413208	0.0172157	0.0189095	0.0327911	0.00449753	-0.00754166	-0.0240479	-0.001194	-0.00849915	-0.0176277	-0.00656509	0.0283432
77	0.0513191	0.0316315	0.0363007	0.02005	0.0550766	0.0192413	0.00325394	0.0327988	0.0286713	-0.00365829	-0.027317	-0.0102081	0.0174751	0.0388908	0.0285378	0.0314445	0.0186729	0.00785065	0.0263462	0.0418549	0.0881195	0.0277901	0.012394	-0.0187225	0.0355949	0.0394249	0.0503731	0.0332642	0.0416183	0.0590782	0.0806084	0.0149574	-0.0592651	0.00466156	0.0403175	0.0271568	0.0286636	0.0194283	0.0447235	0.0359764	0.04179	0.00387573	-0.0242615	0.0182076	0.0290565	-0.00207138	0.0408669	0.0932999	0.0576401
79	0.0542641	0.0540466	0.0394363	0.0368004	0.0583	0.0491447	0.0248985	0.00953674	0.0152893	0.00063324	-0.010788	-0.0100861	0.0369492	0.0685768	0.0755119	0.0861034	0.0949383	0.0723038	0.0530586	0.04566	0.0753822	0.0408554	0.0092392	0.0139046	0.03088	0.00559998	0.0161057	0.0342102	-0.00669861	-0.0317802	-0.0385475	0.00516129	-0.0100594	0.00314713	0.0173264	0.0582657	0.0305328	0.0679855	0.102486	-0.024498	0.00612259	-0.0306587	0.00490189	0.0309219	0.0517311	0.0245552	0.0516167	0.0598717	0.0567894
81	0.0327663	0.0531158	0.0451603	0.0453625	0.0360775	0.0309486	0.0160103	0.00109673	0.0124798	0.0424099	0.00680351	-0.0140419	-0.0143166	0.00130844	0.0163345	0.0680027	0.0876541	0.0810719	0.0438976	0.0519619	0.0518265	0.0470524	0.0535526	0.0416088	0.0261631	0.0592575	0.0291939	0.0386429	0.0328598	0.0353889	0.0466385	0.00521851	-0.0154572	-0.0217094	0.00345612	0.00977325	-0.00577927	-0.00621414	0.0298691	-0.0146179	-0.00665665	0.029686	0.0384331	0.0432434	0.0236244	0.0396233	0.0681534	0.0129814	0.0327644
83	0.0684357	0.0644627	0.0931568	0.0876064	0.0692406	0.051157	0.0403461	0.0210781	0.0392208	0.0402222	0.0408783	0.0490036	0.0427017	0.029747	0.0591927	0.0799313	0.080719	0.0659294	0.0400124	0.0081768	0.0172596	0.0268402	0.0282345	-0.00912666	-0.028616	-0.025526	-0.00607491	0.00114059	0.00233078	0.0236931	0.0769157	0.0830917	0.0564728	0.0386467	0.0405235	0.0377121	0.024765	0.0183182	0.0153046	0.0266876	0.0634613	0.0620232	0.0309868	0.00302505	0.00930786	0.0487213	0.0365257	0.0294647	0.0238647
85	0.0697994	0.0608006	0.0387516	0.0286961	0.0115871	0.008461	-0.00197983	0.00582504	0.0123768	0.0251541	0.0261822	0.021883	0.0273037	0.020771	0.028223	0.00966644	0.0230236	0.013628	0.0116348	0.00189781	-0.00374413	-0.00844002	-0.00423813	-0.00961113	-0.0173817	-0.0271225	-0.0329075	-0.0274773	-0.0246315	-0.0194359	-0.0158653	-0.000736237	-0.00991058	-0.020359	-0.0294228	-0.0340347	-0.0173149	0.0015564	0.0165672	0.0244331	0.00802612	-0.00922775	-0.0152664	-0.012764	-0.00804138	0.00822449	0.0106812	0.0104027	0.00482941
87	0.0646057	0.0442181	0.0326061	0.0362453	0.0268288	0.0299454	0.0430584	0.0377712	0.0224361	0.00663567	0.00447083	0.000902176	-0.00583839	-0.0162411	-0.0127411	-0.0189457	-0.0276585	-0.0275192	-0.0448608	-0.0473404	-0.0447636	-0.0399284	-0.025423	-0.0208931	-0.0228958	-0.0247955	-0.0300026	-0.0278206	-0.025238	-0.0290108	-0.0279522	-0.0194912	-0.0100403	-0.0130558	-0.00910568	-0.00945663	-0.00605011	-0.00651932	-0.0124817	-0.0168533	-0.0178757	-0.0274391	-0.0262184	-0.011879	-0.00372696	0.00233841	0.0152473	0.029995	0.0368233
89	0.0906506	0.0906506	0.0906506	0.0906506	0.0906506	0.0906506	0.0906506	0.0906506	0.0906506	0.0906506	0.0906506	0.0906506	0.0906506	0.0906506	0.0906506	0.0906506	0.0906506	0.0906506	0.0906506	0.0906506	0.0906506	0.0906506	0.0906506	0.0906506	0.0906506	0.0906506	0.0906506	0.0906506	0.0906506	0.0906506	0.0906506	0.0906506	0.0906506	0.0906506	0.0906506	0.0906506	0.0906506	0.0906506	0.0906506	0.0906506	0.0906506	0.0906506	0.0906506	0.0906506	0.0906506	0.0906506	0.0906506	0.0906506	0.0906506
[truncated: 95 more columns]

## Sheet: 335hPa
lat (degN) \ lon (degE)	-178.75	-176.25	-173.75	-171.25	-168.75	-166.25	-163.75	-161.25	-158.75	-156.25	-153.75	-151.25	-148.75	-146.25	-143.75	-141.25	-138.75	-136.25	-133.75	-131.25	-128.75	-126.25	-123.75	-121.25	-118.75	-116.25	-113.75	-111.25	-108.75	-106.25	-103.75	-101.25	-98.75	-96.25	-93.75	-91.25	-88.75	-86.25	-83.75	-81.25	-78.75	-76.25	-73.75	-71.25	-68.75	-66.25	-63.75	-61.25	-58.75
-89	0.197838	0.197838	0.197838	0.197838	0.197838	0.197838	0.197838	0.197838	0.197838	0.197838	0.197838	0.197838	0.197838	0.197838	0.197838	0.197838	0.197838	0.197838	0.197838	0.197838	0.197838	0.197838	0.197838	0.197838	0.197838	0.197838	0.197838	0.197838	0.197838	0.197838	0.197838	0.197838	0.197838	0.197838	0.197838	0.197838	0.197838	0.197838	0.197838	0.197838	0.197838	0.197838	0.197838	0.197838	0.197838	0.197838	0.197838	0.197838	0.197838
-87	0.199825	0.198997	0.199703	0.200321	0.202377	0.202999	0.203979	0.203857	0.199295	0.196667	0.206108	0.214615	0.213421	0.205837	0.204277	0.201332	0.198605	0.196178	0.194527	0.198685	0.201504	0.20187	0.200424	0.198162	0.197273	0.197227	0.197216	0.19651	0.195034	0.193283	0.193188	0.192711	0.195206	0.19556	0.196724	0.196289	0.196896	0.196346	0.195896	0.195244	0.194569	0.195301	0.196918	0.197304	0.197189	0.196548	0.196468	0.19593	0.195923
-85	0.198738	0.203827	0.193947	0.19099	0.193237	0.191902	0.195995	0.19902	0.200638	0.197289	0.199471	0.20013	0.199005	0.197906	0.197487	0.198021	0.197079	0.195763	0.196457	0.194134	0.187592	0.187492	0.188396	0.191177	0.192619	0.192314	0.191265	0.192589	0.195583	0.194901	0.193523	0.194935	0.198826	0.20026	0.195576	0.195007	0.196396	0.204906	0.204979	0.204082	0.202221	0.202396	0.203415	0.203854	0.202694	0.202751	0.205978	0.208881	0.212132
-83	0.193192	0.190994	0.190266	0.187939	0.186108	0.185886	0.185165	0.184181	0.184055	0.183987	0.18391	0.182537	0.181946	0.182178	0.183472	0.18301	0.183128	0.182899	0.182781	0.181862	0.179482	0.180981	0.181705	0.185017	0.186287	0.186699	0.194118	0.202061	0.205906	0.205204	0.203316	0.206745	0.208298	0.210251	0.211754	0.210529	0.211914	0.211555	0.211994	0.211468	0.210262	0.209919	0.211266	0.209873	0.211098	0.213734	0.216957	0.22221	0.227482
-81	0.192116	0.190983	0.190258	0.188049	0.185345	0.186077	0.186905	0.187187	0.187523	0.187069	0.187202	0.187977	0.188873	0.189331	0.189442	0.189266	0.188873	0.187809	0.186378	0.186104	0.186802	0.187054	0.188396	0.189381	0.192829	0.194561	0.197773	0.200558	0.203617	0.204067	0.206577	0.209679	0.208878	0.211781	0.215698	0.216331	0.2169	0.215847	0.210987	0.209637	0.212326	0.218925	0.222	0.222733	0.22353	0.225616	0.225056	0.222198	0.224445
-79	0.203976	0.205334	0.204845	0.203812	0.200249	0.199154	0.199345	0.198742	0.198753	0.194954	0.191479	0.191486	0.193478	0.198162	0.203197	0.205555	0.202667	0.20034	0.198853	0.197002	0.199303	0.197578	0.200481	0.200333	0.198265	0.194637	0.196205	0.19915	0.202839	0.206509	0.21072	0.21542	0.220196	0.223957	0.225056	0.222958	0.221039	0.211411	0.230095	0.22451	0.221806	0.222519	0.2244	0.224445	0.224277	0.228638	0.227657	0.226391	0.226097
-77	0.216171	0.219448	0.219807	0.218082	0.21579	0.213585	0.212101	0.212479	0.211697	0.207668	0.205841	0.202923	0.205509	0.210617	0.205898	0.199009	0.19701	0.197147	0.197701	0.197079	0.196217	0.193558	0.191235	0.198792	0.203678	0.202648	0.20034	0.199574	0.200825	0.205719	0.212006	0.218918	0.226959	0.231331	0.234589	0.235622	0.235687	0.237022	0.233879	0.225601	0.215805	0.217381	0.217361	0.21933	0.222839	0.223591	0.220589	0.219837	0.224602
-75	0.228619	0.226608	0.223656	0.221256	0.218746	0.220417	0.222275	0.219868	0.219215	0.216335	0.217125	0.2136	0.212116	0.212437	0.209011	0.208981	0.207214	0.206402	0.206215	0.206161	0.205532	0.202923	0.202824	0.2043	0.205345	0.205433	0.205975	0.205311	0.204281	0.203819	0.20837	0.215553	0.220512	0.215828	0.218143	0.2169	0.221138	0.211056	0.211979	0.211777	0.209709	0.211163	0.20892	0.215942	0.214302	0.215279	0.227432	0.224827	0.219246
-73	0.234577	0.229347	0.227356	0.226631	0.221313	0.223469	0.228382	0.225197	0.225288	0.225739	0.222633	0.222256	0.22118	0.219868	0.214008	0.211208	0.210342	0.209145	0.208946	0.211678	0.212982	0.210094	0.211235	0.209934	0.211418	0.212242	0.212944	0.213474	0.211811	0.203289	0.200638	0.205284	0.212608	0.219574	0.216465	0.220505	0.220932	0.218174	0.215805	0.224297	0.218712	0.224915	0.230888	0.23341	0.23801	0.228107	0.215446	0.233562	0.224167
-71	0.240337	0.234081	0.229591	0.230022	0.223698	0.224697	0.227219	0.229301	0.231556	0.232189	0.230755	0.231949	0.233364	0.233761	0.234497	0.23177	0.223495	0.220284	0.217525	0.221008	0.224094	0.224609	0.223648	0.219692	0.215714	0.21241	0.212563	0.215347	0.215771	0.21722	0.218773	0.217503	0.220219	0.221416	0.22216	0.228226	0.226719	0.222488	0.224049	0.226261	0.22757	0.230331	0.235798	0.238091	0.237106	0.223866	0.211147	0.234859	0.21806
-69	0.232998	0.233231	0.230415	0.228851	0.226231	0.240124	0.24448	0.240936	0.237869	0.240208	0.243103	0.244225	0.243725	0.237724	0.235565	0.240185	0.241325	0.2342	0.229763	0.23056	0.231155	0.229866	0.226101	0.22176	0.22546	0.229473	0.226871	0.224323	0.225513	0.224113	0.228817	0.229511	0.230011	0.225658	0.229748	0.239895	0.241108	0.23394	0.234299	0.235008	0.236858	0.24131	0.247963	0.236832	0.242313	0.219917	0.22945	0.228577	0.216919
-67	0.236942	0.236107	0.237751	0.235065	0.241257	0.243793	0.250011	0.253521	0.247177	0.245995	0.246128	0.249546	0.252392	0.248848	0.245377	0.243706	0.244869	0.237602	0.234573	0.237316	0.238388	0.236916	0.237522	0.235077	0.241608	0.243763	0.238972	0.23283	0.236828	0.238415	0.239635	0.239491	0.242832	0.24202	0.246254	0.251617	0.255863	0.255184	0.257626	0.26186	0.25742	0.260197	0.259872	0.255127	0.236286	0.226181	0.22971	0.223751	0.215309
-65	0.248844	0.251419	0.24773	0.24649	0.245121	0.250095	0.255219	0.256462	0.253937	0.254429	0.254589	0.254559	0.261822	0.260517	0.252148	0.250839	0.253448	0.251083	0.2453	0.245945	0.245068	0.240074	0.236099	0.23922	0.245644	0.247169	0.247791	0.245411	0.248898	0.251122	0.252415	0.254742	0.259773	0.261986	0.264359	0.265713	0.266079	0.267597	0.262524	0.259739	0.258724	0.256855	0.258125	0.255024	0.245304	0.243095	0.236698	0.232128	0.230942
-63	0.255718	0.254433	0.259323	0.255444	0.246628	0.24511	0.25164	0.255802	0.258076	0.263447	0.267681	0.270168	0.272102	0.278172	0.271416	0.269253	0.270622	0.268059	0.256752	0.252136	0.253193	0.248665	0.244183	0.248184	0.25164	0.252274	0.253197	0.253933	0.257996	0.259811	0.260357	0.263493	0.266541	0.274078	0.277531	0.273907	0.27047	0.274246	0.270828	0.263775	0.256031	0.253456	0.253849	0.253731	0.257729	0.245686	0.247238	0.251682	0.243439
-61	0.261879	0.266689	0.270248	0.275661	0.274483	0.269104	0.262573	0.260628	0.256279	0.257416	0.26693	0.2719	0.276493	0.283978	0.286724	0.283096	0.280922	0.275761	0.275555	0.272903	0.26976	0.270824	0.271145	0.269955	0.266434	0.260777	0.256855	0.261528	0.268501	0.270851	0.274193	0.27673	0.27496	0.273258	0.271477	0.268806	0.271732	0.271164	0.276047	0.272888	0.272755	0.264893	0.259724	0.252144	0.243568	0.23579	0.243584	0.250328	0.257793
-59	0.275185	0.276829	0.279854	0.288364	0.293587	0.284592	0.275589	0.269138	0.270424	0.271809	0.278275	0.283001	0.288208	0.291779	0.299988	0.297661	0.285507	0.276379	0.280693	0.281918	0.283951	0.288757	0.288731	0.284798	0.285629	0.288807	0.285339	0.286034	0.28791	0.283749	0.281849	0.277687	0.275719	0.277294	0.276443	0.277168	0.278618	0.276711	0.279888	0.276848	0.273403	0.27124	0.26915	0.267445	0.261581	0.248734	0.248474	0.260303	0.268379
-57	0.289753	0.283966	0.289894	0.286934	0.286198	0.287415	0.28912	0.287857	0.284084	0.28286	0.289646	0.291122	0.295582	0.298527	0.299587	0.300266	0.288315	0.289829	0.293411	0.293312	0.293831	0.295162	0.297199	0.292049	0.292183	0.298466	0.302299	0.302662	0.298008	0.294346	0.290688	0.28841	0.293716	0.295723	0.293526	0.28944	0.28207	0.2756	0.275471	0.277782	0.275654	0.277481	0.280132	0.276806	0.2733	0.26511	0.268475	0.276058	0.270386
-55	0.303288	0.308815	0.30827	0.296028	0.296253	0.298073	0.294868	0.288601	0.288403	0.289547	0.296379	0.303169	0.302685	0.298515	0.300304	0.293255	0.288425	0.29187	0.295605	0.301868	0.301014	0.300667	0.299759	0.299442	0.300526	0.298927	0.299286	0.302563	0.308361	0.308155	0.30711	0.306362	0.311325	0.312798	0.314018	0.308483	0.302406	0.292553	0.285854	0.286213	0.2845	0.288548	0.286003	0.290997	0.291981	0.285267	0.2831	0.287289	0.293476
-53	0.305233	0.301926	0.298595	0.30402	0.310642	0.31382	0.3064	0.306225	0.302864	0.302246	0.30621	0.304531	0.304447	0.303276	0.301975	0.306019	0.302719	0.300076	0.303318	0.303352	0.305931	0.309612	0.311764	0.31496	0.311623	0.308632	0.308475	0.313889	0.313984	0.311211	0.309528	0.310287	0.312328	0.312313	0.315445	0.314793	0.315403	0.307674	0.30233	0.293297	0.299942	0.303326	0.303272	0.307068	0.309292	0.305569	0.296398	0.298683	0.311436
-51	0.289852	0.293419	0.301979	0.308899	0.31337	0.309113	0.302853	0.306889	0.318954	0.31657	0.30978	0.305855	0.300568	0.306801	0.31023	0.329315	0.329628	0.319489	0.312191	0.313812	0.317299	0.322216	0.325432	0.326061	0.321426	0.321945	0.327187	0.328617	0.322853	0.31826	0.31789	0.31823	0.322136	0.327251	0.3321	0.325699	0.320705	0.32159	0.31551	0.300724	0.306797	0.315338	0.310066	0.311707	0.310814	0.312191	0.308025	0.303162	0.299755
-49	0.28392	0.28569	0.279919	0.282482	0.293129	0.299522	0.310223	0.327133	0.335087	0.322189	0.311344	0.302029	0.301243	0.306976	0.316086	0.329014	0.331161	0.336761	0.342651	0.336662	0.338417	0.344688	0.34856	0.342033	0.343128	0.343521	0.340511	0.333088	0.325756	0.324173	0.324112	0.322018	0.3293	0.328724	0.325272	0.324425	0.328381	0.322102	0.316368	0.309052	0.306755	0.31192	0.302845	0.312054	0.309788	0.308346	0.305058	0.301193	0.300854
-47	0.299011	0.293293	0.287178	0.285297	0.29533	0.320087	0.342831	0.335804	0.327473	0.308689	0.307968	0.314972	0.316723	0.323086	0.337242	0.345734	0.347698	0.348866	0.351562	0.34951	0.359909	0.361294	0.356083	0.34322	0.338448	0.339893	0.339432	0.339603	0.340881	0.340218	0.334957	0.331001	0.318905	0.310738	0.316078	0.326286	0.329395	0.330269	0.327618	0.326679	0.331944	0.318501	0.297581	0.295544	0.309418	0.310642	0.315163	0.317924	0.316658
-45	0.325016	0.31963	0.304729	0.322975	0.330059	0.343597	0.346546	0.336201	0.328831	0.31163	0.313057	0.336334	0.343704	0.347569	0.360462	0.354187	0.350838	0.35532	0.35574	0.362968	0.364162	0.348137	0.33136	0.329041	0.331276	0.329197	0.340412	0.345425	0.345146	0.347466	0.35165	0.347046	0.332561	0.32589	0.324265	0.327808	0.333363	0.337021	0.330017	0.332451	0.333847	0.322426	0.308117	0.307903	0.326187	0.329861	0.332882	0.336529	0.342651
-43	0.323032	0.319546	0.314796	0.334805	0.350433	0.359509	0.354462	0.35009	0.343498	0.332233	0.359657	0.363491	0.356834	0.359394	0.353191	0.347313	0.352886	0.352619	0.349194	0.34737	0.341763	0.331642	0.339344	0.348499	0.340862	0.35503	0.362209	0.36689	0.373348	0.369312	0.355846	0.352665	0.352345	0.343113	0.345749	0.356895	0.357384	0.358536	0.351456	0.338379	0.327377	0.342731	0.342922	0.319626	0.336945	0.347397	0.34848	0.358269	0.366356
-41	0.322147	0.321964	0.328667	0.339249	0.358284	0.366619	0.355038	0.364925	0.367558	0.395218	0.388939	0.368118	0.373425	0.371494	0.365868	0.359257	0.351704	0.360947	0.354256	0.349724	0.351555	0.358135	0.369572	0.376106	0.360386	0.354279	0.36668	0.382141	0.38641	0.385799	0.375416	0.36042	0.368717	0.369362	0.363945	0.369492	0.380627	0.387566	0.378918	0.361088	0.353237	0.354851	0.347599	0.33799	0.357613	0.366367	0.362633	0.366276	0.361408
-39	0.326714	0.327892	0.350441	0.346127	0.360695	0.379894	0.38575	0.389343	0.398048	0.415222	0.406357	0.391937	0.395935	0.388248	0.387474	0.372131	0.372147	0.376076	0.364216	0.381077	0.394253	0.401283	0.40469	0.390068	0.371571	0.379288	0.392189	0.399227	0.385796	0.387928	0.377472	0.37978	0.38044	0.378193	0.377659	0.373024	0.385277	0.386143	0.378448	0.384121	0.385811	0.392902	0.387897	0.377045	0.402649	0.378311	0.364136	0.366951	0.367237
-37	0.386185	0.391121	0.388412	0.397972	0.396545	0.420876	0.426849	0.415993	0.422997	0.421814	0.435265	0.436913	0.429962	0.414574	0.413231	0.40213	0.414356	0.402264	0.375294	0.398933	0.409161	0.415623	0.412395	0.408516	0.393818	0.398235	0.415871	0.432049	0.42215	0.404518	0.394531	0.382061	0.384861	0.375797	0.3806	0.397758	0.40617	0.410439	0.400444	0.403435	0.393532	0.397179	0.395866	0.391136	0.39143	0.3904	0.366219	0.376247	0.394081
-35	0.421608	0.42907	0.419838	0.413322	0.436348	0.448097	0.446198	0.451103	0.452438	0.448364	0.456543	0.471855	0.479309	0.456318	0.44965	0.450119	0.444942	0.42989	0.401756	0.422031	0.43396	0.419949	0.432587	0.427883	0.418438	0.425667	0.442585	0.448742	0.439503	0.422749	0.408878	0.38575	0.381557	0.368996	0.373192	0.385914	0.400665	0.41161	0.406799	0.41016	0.411938	0.411404	0.423824	0.420208	0.406864	0.436146	0.407852	0.41494	0.426708
-33	0.465744	0.464737	0.462173	0.462723	0.47139	0.471527	0.474228	0.50042	0.498894	0.515736	0.509083	0.518005	0.51453	0.505665	0.505146	0.491806	0.501328	0.481224	0.489582	0.495022	0.462261	0.42939	0.422447	0.422012	0.43504	0.438164	0.457188	0.474194	0.448223	0.436024	0.419689	0.397308	0.388386	0.392254	0.405117	0.409214	0.416965	0.426529	0.42775	0.422932	0.417294	0.42313	0.440975	0.444118	0.445362	0.478401	0.472034	0.477249	0.480865
-31	0.490364	0.493355	0.492172	0.512337	0.524239	0.524231	0.546558	0.542221	0.543232	0.567688	0.570564	0.55529	0.572117	0.555836	0.539959	0.506317	0.501678	0.501141	0.500572	0.506878	0.486374	0.463093	0.441166	0.451759	0.449444	0.437546	0.459347	0.459728	0.440845	0.438725	0.425205	0.427601	0.419655	0.41328	0.436058	0.444618	0.437603	0.440956	0.454849	0.458622	0.45042	0.449333	0.463501	0.45892	0.474224	0.500813	0.478954	0.481533	0.465847
-29	0.519596	0.526886	0.526276	0.538109	0.549221	0.556656	0.558537	0.560505	0.55798	0.573605	0.557266	0.573624	0.578655	0.56929	0.546204	0.533386	0.490849	0.498531	0.516392	0.505001	0.470921	0.449146	0.44804	0.461166	0.465164	0.47123	0.474514	0.459335	0.455456	0.464169	0.473774	0.478191	0.478001	0.467735	0.454296	0.449265	0.452412	0.467545	0.480061	0.477196	0.466789	0.464878	0.478752	0.476681	0.461445	0.505138	0.465683	0.452396	0.451065
-27	0.60104	0.586777	0.587021	0.583973	0.546196	0.545544	0.574623	0.581039	0.579544	0.573814	0.566818	0.566963	0.570961	0.557396	0.560226	0.562382	0.529057	0.520763	0.515488	0.496838	0.475296	0.467926	0.482292	0.481602	0.458485	0.469475	0.498287	0.470242	0.474499	0.49202	0.511116	0.507851	0.497478	0.484539	0.462635	0.461163	0.465279	0.4706	0.472267	0.465904	0.45665	0.46159	0.47271	0.476891	0.451977	0.475693	0.468826	0.436752	0.43026
-25	0.63472	0.623657	0.641613	0.630577	0.61496	0.616772	0.622215	0.597496	0.570232	0.56712	0.592892	0.591949	0.569401	0.581177	0.585743	0.573612	0.57576	0.531296	0.50415	0.469997	0.483185	0.492592	0.493973	0.486298	0.46336	0.438427	0.439896	0.469353	0.458889	0.472729	0.485565	0.486805	0.479759	0.479073	0.479473	0.474808	0.467079	0.467148	0.473843	0.471283	0.461937	0.462997	0.473351	0.469624	0.430309	0.447739	0.444126	0.393112	0.374687
-23	0.613701	0.610119	0.612995	0.622032	0.595116	0.586525	0.612801	0.590984	0.592701	0.592056	0.562428	0.582787	0.572849	0.580215	0.553108	0.52887	0.54248	0.502441	0.491959	0.47506	0.487762	0.480442	0.511066	0.497372	0.472767	0.454243	0.45303	0.447788	0.465675	0.482052	0.478741	0.470623	0.462513	0.469894	0.474712	0.465878	0.453217	0.441944	0.444218	0.452587	0.462814	0.473621	0.447746	0.419334	0.407047	0.364841	0.34742	0.315697	0.315163
-21	0.638447	0.620628	0.597317	0.572269	0.580322	0.5896	0.563774	0.546268	0.534946	0.537945	0.559322	0.572926	0.558426	0.567169	0.526402	0.465607	0.517521	0.521866	0.490379	0.459675	0.453426	0.434196	0.445248	0.487263	0.493011	0.469799	0.465866	0.462967	0.4702	0.471958	0.46273	0.436054	0.428452	0.427643	0.423061	0.431992	0.428448	0.417149	0.422436	0.420326	0.413498	0.406208	0.37796	0.371876	0.301777	0.284153	0.285801	0.286282	0.27557
-19	0.621578	0.618038	0.613575	0.594204	0.604149	0.591675	0.568386	0.511185	0.485706	0.531292	0.578209	0.56966	0.543968	0.540806	0.498219	0.465332	0.448498	0.511185	0.494865	0.455574	0.425922	0.431961	0.444305	0.478527	0.486828	0.462822	0.440113	0.451511	0.455734	0.445683	0.412815	0.366924	0.349777	0.361389	0.36977	0.38052	0.373268	0.38139	0.391129	0.370033	0.362705	0.350056	0.301598	0.298901	0.249218	0.214645	0.223026	0.211235	0.195934
-17	0.619797	0.601158	0.594688	0.611328	0.584049	0.568638	0.608982	0.565662	0.524506	0.533058	0.538914	0.523129	0.539707	0.527397	0.485203	0.462551	0.451004	0.49691	0.493038	0.457893	0.435555	0.468307	0.477852	0.453175	0.439762	0.432808	0.435749	0.424358	0.41621	0.411533	0.376457	0.339752	0.330032	0.341869	0.346611	0.33078	0.327782	0.34988	0.34687	0.338032	0.311485	0.297855	0.272556	0.250496	0.26141	0.245804	0.195107	0.142307	0.129341
-15	0.616577	0.625099	0.559464	0.560265	0.534523	0.573978	0.56786	0.56612	0.504791	0.525642	0.470287	0.485104	0.457222	0.490452	0.477699	0.460846	0.478889	0.443607	0.434872	0.436253	0.448116	0.468803	0.458626	0.428654	0.406075	0.412689	0.405811	0.382553	0.369587	0.366295	0.354015	0.338703	0.332867	0.33231	0.330296	0.311337	0.322491	0.319908	0.327827	0.333698	0.27153	0.269947	0.255989	0.243156	0.178062	0.187851	0.173962	0.153156	0.124615
-13	0.596981	0.581768	0.520287	0.547966	0.52179	0.591759	0.581219	0.45372	0.517521	0.491722	0.477482	0.468704	0.468727	0.445236	0.44125	0.436932	0.426483	0.413181	0.410023	0.412701	0.411236	0.426125	0.397984	0.387547	0.379009	0.364449	0.348137	0.333511	0.34589	0.339298	0.355495	0.338242	0.306374	0.305676	0.285042	0.285053	0.302338	0.309959	0.326523	0.290524	0.25835	0.221409	0.15184	0.193233	0.168121	0.0864296	0.0630684	0.0675163	0.0357895
-11	0.520573	0.533596	0.559196	0.557018	0.547684	0.514763	0.511913	0.454182	0.482121	0.434185	0.440693	0.405266	0.42379	0.430405	0.382431	0.357109	0.363804	0.363338	0.360336	0.388638	0.405529	0.403698	0.383263	0.359646	0.337017	0.321163	0.30056	0.298328	0.317039	0.319386	0.319191	0.305763	0.307297	0.296082	0.288666	0.312679	0.354149	0.350147	0.298515	0.303452	0.262661	0.192627	0.171555	0.159195	0.133705	0.0791245	0.0778694	0.0668373	0.0148468
-9	0.421726	0.437439	0.433783	0.52994	0.490557	0.482447	0.409304	0.431366	0.386293	0.415785	0.409168	0.416128	0.4048	0.41861	0.373173	0.345421	0.336563	0.349022	0.368542	0.391117	0.378479	0.367241	0.324459	0.307732	0.293808	0.292595	0.290043	0.299007	0.303741	0.28968	0.279243	0.283478	0.31078	0.299072	0.318287	0.325424	0.316853	0.255398	0.214317	0.206192	0.159405	0.133812	0.179184	0.126789	0.0996399	0.124996	0.099781	-0.0975761	-0.0502472
-7	0.403458	0.433151	0.39477	0.416639	0.44459	0.425798	0.404984	0.369526	0.360083	0.383341	0.342861	0.350035	0.335207	0.36031	0.317219	0.28072	0.330715	0.340588	0.354713	0.33765	0.323025	0.30114	0.266888	0.275822	0.267162	0.27504	0.274361	0.296474	0.319599	0.310333	0.287788	0.275009	0.33242	0.303329	0.291634	0.281006	0.25161	0.205681	0.171741	0.173943	0.153477	0.142235	0.178978	0.140945	0.0904579	0.111015	0.0447197	-0.0496674	-0.0307388
-5	0.384329	0.378689	0.377958	0.366114	0.357708	0.328922	0.33864	0.339893	0.37565	0.358515	0.357672	0.316927	0.299416	0.300556	0.297165	0.31065	0.3377	0.329147	0.305191	0.285301	0.285023	0.275467	0.250984	0.254337	0.246613	0.261902	0.269661	0.293026	0.291588	0.295902	0.310081	0.249844	0.252193	0.23074	0.206097	0.19117	0.217888	0.18401	0.164604	0.171597	0.176739	0.1376	0.12849	0.188412	0.154945	0.0918846	0.0882568	0.0935211	0.00550461
-3	0.399593	0.388653	0.357191	0.379572	0.352531	0.331829	0.323584	0.325226	0.338472	0.344236	0.316944	0.322834	0.297564	0.280079	0.287792	0.295624	0.293324	0.295464	0.290928	0.274517	0.255821	0.25148	0.222855	0.233654	0.224236	0.242607	0.270939	0.277992	0.261642	0.250053	0.261055	0.221355	0.175419	0.164745	0.138588	0.111618	0.126217	0.149307	0.166248	0.190849	0.0631523	0.063942	0.0623779	0.151207	0.107395	0.0667458	0.0364914	0.0519829	0.0190201
-1	0.375414	0.306141	0.348434	0.371965	0.34761	0.350651	0.315645	0.311823	0.32859	0.324018	0.345085	0.32383	0.30386	0.31739	0.327629	0.316818	0.30827	0.313652	0.290237	0.250332	0.249828	0.268517	0.240559	0.192234	0.170216	0.19149	0.226284	0.247715	0.235325	0.217934	0.209148	0.191547	0.162907	0.14423	0.153179	0.125484	0.0929184	0.0699768	0.0987473	0.0835228	0.0798302	0.109104	0.181705	0.187977	0.142799	0.113525	0.0971909	0.0891991	0.11919
1	0.326418	0.328045	0.361639	0.366674	0.350681	0.335802	0.334986	0.324427	0.299866	0.308783	0.31461	0.278214	0.254967	0.304462	0.306038	0.30558	0.302193	0.282379	0.263817	0.256359	0.262997	0.238564	0.201939	0.146862	0.129478	0.15715	0.188759	0.189705	0.178074	0.166866	0.156212	0.158794	0.152981	0.112904	0.150425	0.154007	0.152287	0.160095	0.173191	0.111156	0.0938644	0.0240746	0.0521355	0.0769272	0.0569153	0.0818024	0.150276	0.0911064	0.0589981
3	0.367447	0.375109	0.301575	0.292963	0.337025	0.331287	0.308926	0.320095	0.31506	0.336197	0.291653	0.283745	0.253048	0.244621	0.230621	0.267666	0.28249	0.272312	0.226997	0.237762	0.236492	0.208694	0.142941	0.14748	0.166546	0.152756	0.155106	0.193302	0.205421	0.18066	0.139095	0.144543	0.158276	0.100792	0.109283	0.0869942	0.114006	0.1143	0.110741	0.112389	0.118805	0.0232277	0.060955	0.0951614	0.110512	0.151367	0.157574	0.0823212	0.0729446
5	0.382694	0.34684	0.281914	0.285099	0.2959	0.29488	0.329826	0.368324	0.396729	0.342869	0.336651	0.327866	0.271877	0.207428	0.211861	0.209877	0.281662	0.284252	0.234066	0.245781	0.240219	0.186359	0.153492	0.146091	0.181797	0.180904	0.192432	0.193306	0.185017	0.124847	0.16217	0.212795	0.241173	0.209534	0.139687	0.131626	0.154198	0.0713387	0.0983582	0.0578117	0.057724	0.0664062	0.0521774	0.0127525	0.0130234	0.109852	0.0512314	0.0612297	0.065361
7	0.354782	0.371159	0.369986	0.331324	0.309015	0.32338	0.307766	0.388618	0.38427	0.370056	0.36227	0.337002	0.320763	0.272976	0.252911	0.245289	0.286495	0.274483	0.259876	0.293736	0.259403	0.255196	0.204136	0.178913	0.120934	0.122646	0.162968	0.107422	0.140656	0.196194	0.159111	0.111034	0.202274	0.301708	0.205231	0.170132	0.180897	0.190804	0.120914	0.102325	0.0241852	0.0250893	0.100063	0.0859604	0.0629082	0.0570717	0.0357895	0.0173149	0.0141106
9	0.368668	0.372368	0.364597	0.371655	0.397076	0.362495	0.3447	0.373924	0.375851	0.383469	0.380348	0.361633	0.347206	0.322697	0.291649	0.281948	0.305611	0.2878	0.262428	0.292728	0.275478	0.249718	0.165337	0.219913	0.163685	0.13517	0.148212	0.093708	0.168285	0.201046	0.211334	0.181564	0.179207	0.155716	0.186653	0.188778	0.265579	0.29623	0.205082	0.132599	0.15633	0.12833	0.112392	0.100082	0.11377	0.100735	0.108109	0.0794907	0.0492821
11	0.397675	0.385654	0.365211	0.372658	0.379593	0.368572	0.370667	0.359062	0.350418	0.379189	0.391209	0.386753	0.383057	0.3466	0.347378	0.351315	0.335083	0.286995	0.254208	0.207069	0.222668	0.20451	0.201	0.240669	0.21011	0.18013	0.211235	0.220287	0.182297	0.182301	0.130196	0.162876	0.199467	0.167252	0.146671	0.140453	0.149456	0.184471	0.211872	0.200405	0.207844	0.18671	0.140591	0.112823	0.110184	0.0816498	0.108208	0.12796	0.0820351
13	0.42028	0.405331	0.407635	0.367256	0.349262	0.386539	0.364391	0.327515	0.336575	0.347679	0.347042	0.339748	0.368908	0.382923	0.371807	0.348988	0.334187	0.315414	0.243237	0.195854	0.197281	0.187798	0.232456	0.243782	0.22403	0.246147	0.252834	0.239208	0.223682	0.185673	0.139328	0.183903	0.209389	0.180988	0.222408	0.22784	0.0966644	0.117867	0.210358	0.243782	0.226585	0.190628	0.155941	0.194977	0.15036	0.151184	0.089756	0.120052	0.129765
15	0.459808	0.440975	0.402931	0.414333	0.383583	0.381435	0.37648	0.361717	0.36097	0.365959	0.365284	0.350262	0.329479	0.341484	0.347153	0.352661	0.34021	0.346706	0.298309	0.281345	0.239876	0.210148	0.213333	0.257946	0.23513	0.280529	0.280933	0.253338	0.25235	0.265377	0.26078	0.199322	0.163593	0.211189	0.246544	0.148499	0.140293	0.172287	0.15522	0.169865	0.177017	0.179707	0.172611	0.201756	0.219917	0.176926	0.184513	0.131397	0.192528
17	0.487209	0.477375	0.472351	0.426685	0.400417	0.368313	0.361084	0.378368	0.387665	0.368019	0.351456	0.349827	0.319061	0.299877	0.312206	0.338383	0.327801	0.35474	0.352657	0.338577	0.312286	0.281334	0.272141	0.278362	0.270145	0.277267	0.250866	0.247643	0.23008	0.239765	0.22501	0.225067	0.190903	0.191391	0.20298	0.151154	0.212715	0.19173	0.14687	0.157772	0.195473	0.235874	0.247543	0.185936	0.256718	0.204662	0.178989	0.208565	0.216045
19	0.469139	0.447975	0.438618	0.457256	0.40543	0.398396	0.382534	0.419178	0.436703	0.413906	0.380234	0.375904	0.385441	0.372959	0.34169	0.334198	0.336502	0.337605	0.352524	0.34399	0.337349	0.340031	0.316051	0.302223	0.304932	0.290356	0.249001	0.23291	0.226589	0.233059	0.246704	0.21109	0.22916	0.193447	0.186729	0.236042	0.260391	0.245491	0.265747	0.224998	0.228855	0.295391	0.323418	0.228638	0.210304	0.224663	0.171421	0.175339	0.209553
21	0.44677	0.426987	0.404083	0.424915	0.389137	0.395157	0.403011	0.428951	0.435036	0.415283	0.407303	0.435116	0.459118	0.424789	0.390499	0.392761	0.36795	0.342083	0.330132	0.344608	0.36734	0.369762	0.352074	0.34161	0.33675	0.315857	0.284687	0.281754	0.274845	0.301716	0.272598	0.234879	0.243633	0.23698	0.239433	0.300957	0.300167	0.319138	0.317085	0.346722	0.260601	0.268353	0.307148	0.273224	0.216557	0.248569	0.171463	0.199783	0.21875
23	0.390984	0.423393	0.431587	0.379711	0.397514	0.410156	0.406364	0.41058	0.409077	0.390419	0.383278	0.401909	0.440372	0.434223	0.402786	0.393066	0.393047	0.366329	0.349602	0.369137	0.389946	0.367496	0.3629	0.368587	0.353325	0.317127	0.258801	0.293339	0.316158	0.299473	0.336891	0.3507	0.305641	0.333054	0.304878	0.28413	0.296886	0.334972	0.338173	0.358566	0.328968	0.27055	0.260925	0.302063	0.297817	0.264885	0.212749	0.264809	0.200798
25	0.390812	0.405346	0.381756	0.363293	0.394596	0.386005	0.363678	0.369129	0.366726	0.352501	0.356495	0.355255	0.354889	0.372524	0.365021	0.374023	0.393505	0.388371	0.37553	0.360531	0.366562	0.354813	0.345116	0.354256	0.345314	0.320755	0.330292	0.328484	0.38192	0.320221	0.335293	0.372219	0.340748	0.354675	0.342766	0.340805	0.304886	0.336884	0.310871	0.335701	0.358253	0.318382	0.309399	0.300636	0.264816	0.31078	0.269619	0.287216	0.232948
27	0.314835	0.283096	0.311913	0.351086	0.386066	0.364037	0.321114	0.323124	0.338905	0.363564	0.374352	0.372845	0.360657	0.345638	0.329258	0.327217	0.336494	0.348408	0.368092	0.356796	0.350487	0.3564	0.371292	0.351891	0.342674	0.320168	0.342461	0.356705	0.358925	0.342773	0.297112	0.273216	0.324768	0.356987	0.368332	0.342072	0.340294	0.35997	0.329956	0.329063	0.296173	0.251999	0.262222	0.248417	0.294159	0.315601	0.259937	0.272655	0.288372
29	0.277191	0.272446	0.305222	0.350487	0.354317	0.388908	0.332359	0.371864	0.385941	0.40255	0.422256	0.374649	0.358658	0.335968	0.33416	0.32058	0.318596	0.33036	0.337151	0.348007	0.332764	0.334602	0.331894	0.323914	0.306145	0.287514	0.329636	0.316864	0.289932	0.297821	0.272652	0.270233	0.312271	0.300056	0.27298	0.290924	0.311508	0.293495	0.359612	0.338585	0.329803	0.263763	0.256371	0.296524	0.274567	0.285225	0.275002	0.27446	0.2752
31	0.302818	0.294731	0.275772	0.27459	0.344864	0.324059	0.315628	0.356544	0.342186	0.339745	0.345764	0.336487	0.34346	0.331413	0.319443	0.348549	0.366623	0.356445	0.332367	0.328445	0.326111	0.315262	0.310982	0.287987	0.267761	0.281723	0.318108	0.287079	0.227638	0.242889	0.244987	0.242241	0.239227	0.281166	0.295448	0.316902	0.301697	0.295135	0.355286	0.353233	0.338921	0.247871	0.297348	0.291206	0.261826	0.239532	0.237892	0.238251	0.282021
33	0.345093	0.317871	0.312721	0.280998	0.313164	0.345451	0.323349	0.305771	0.295219	0.298172	0.291603	0.287346	0.306206	0.29969	0.334671	0.343758	0.347366	0.338928	0.326363	0.300507	0.294632	0.307091	0.296425	0.290176	0.276566	0.287201	0.282997	0.278709	0.258125	0.255241	0.240059	0.245209	0.235321	0.236557	0.285439	0.283676	0.299103	0.297348	0.295303	0.304138	0.295853	0.28212	0.271568	0.255058	0.267052	0.231567	0.210777	0.222145	0.293861
35	0.308807	0.278908	0.293114	0.287613	0.28183	0.267143	0.260132	0.281059	0.287483	0.302345	0.291473	0.28009	0.283577	0.302139	0.307663	0.295174	0.292747	0.298203	0.283554	0.2854	0.281219	0.291931	0.306114	0.296638	0.249168	0.257759	0.25518	0.258514	0.261848	0.273163	0.267899	0.263367	0.2715	0.251083	0.253815	0.273491	0.279228	0.292923	0.303093	0.321899	0.29332	0.265106	0.236252	0.251175	0.248825	0.238022	0.230942	0.239624	0.280785
37	0.275124	0.274681	0.267609	0.224564	0.194016	0.196976	0.213501	0.220856	0.24839	0.279305	0.257828	0.256195	0.268623	0.254311	0.2323	0.233444	0.267075	0.283691	0.287247	0.296783	0.293297	0.279762	0.288765	0.288239	0.278557	0.268852	0.220512	0.219864	0.235863	0.255386	0.269325	0.244011	0.266823	0.248474	0.234085	0.272049	0.259567	0.262047	0.258049	0.273094	0.260971	0.251823	0.244438	0.231827	0.225906	0.212418	0.219482	0.242477	0.245056
39	0.216957	0.221069	0.212128	0.198082	0.200356	0.201897	0.210289	0.191895	0.206741	0.194656	0.214287	0.215469	0.228218	0.203712	0.188705	0.219063	0.241806	0.249207	0.257202	0.265404	0.277122	0.276932	0.273811	0.242203	0.233704	0.242638	0.239143	0.232552	0.22007	0.207161	0.229286	0.238152	0.266876	0.251389	0.246857	0.236084	0.250839	0.244644	0.225304	0.200935	0.175255	0.170059	0.19249	0.194168	0.206551	0.208405	0.181122	0.194984	0.235191
41	0.199905	0.204781	0.19664	0.183273	0.174904	0.185516	0.146225	0.143127	0.152626	0.187782	0.191483	0.19445	0.18998	0.201202	0.201073	0.228073	0.247078	0.257896	0.263672	0.246506	0.246353	0.252678	0.25708	0.229828	0.223869	0.215149	0.232216	0.224678	0.222656	0.199013	0.225388	0.209572	0.196198	0.205536	0.227837	0.222473	0.216347	0.211349	0.199921	0.200172	0.185287	0.184715	0.208786	0.212013	0.183418	0.188148	0.200264	0.186768	0.181549
43	0.197708	0.190636	0.187233	0.184258	0.187271	0.163811	0.137939	0.1315	0.120407	0.15712	0.19339	0.203758	0.2173	0.184441	0.195457	0.222763	0.256805	0.271179	0.252098	0.230652	0.215866	0.233475	0.251694	0.238945	0.21698	0.205452	0.217178	0.214462	0.207611	0.205055	0.213379	0.203842	0.18483	0.213554	0.181786	0.184555	0.190063	0.180023	0.191925	0.199577	0.187897	0.167366	0.162804	0.173401	0.188522	0.20034	0.198883	0.206802	0.196274
45	0.205177	0.191536	0.195282	0.168785	0.176132	0.159546	0.158157	0.16523	0.173378	0.1922	0.184357	0.186646	0.185379	0.2099	0.203896	0.21212	0.217873	0.232788	0.245148	0.23867	0.217888	0.220398	0.226303	0.210274	0.21489	0.193504	0.203239	0.18232	0.186935	0.200089	0.207703	0.198639	0.197159	0.205681	0.171684	0.177872	0.177834	0.187172	0.201118	0.185524	0.198784	0.181679	0.168777	0.166786	0.180428	0.189468	0.181107	0.173653	0.181992
47	0.1745	0.175148	0.188484	0.175781	0.136177	0.139381	0.145683	0.181076	0.207161	0.177826	0.184753	0.198402	0.203957	0.204865	0.225548	0.209961	0.206467	0.215431	0.21199	0.216423	0.209953	0.221367	0.197632	0.191505	0.223076	0.205925	0.210045	0.196861	0.192329	0.185524	0.176376	0.194878	0.181564	0.185768	0.187531	0.195824	0.177734	0.174324	0.183434	0.197357	0.207237	0.172623	0.162415	0.184799	0.168739	0.178642	0.17852	0.156647	0.180656
49	0.18689	0.185593	0.178474	0.181381	0.162483	0.13855	0.146507	0.173653	0.193497	0.171814	0.181381	0.19191	0.216927	0.224022	0.207153	0.191559	0.187134	0.191925	0.168297	0.165688	0.181259	0.184708	0.1838	0.183044	0.199821	0.191864	0.213234	0.222725	0.236465	0.217621	0.207932	0.173813	0.145668	0.153923	0.182137	0.180672	0.184914	0.193588	0.184814	0.186684	0.192055	0.154381	0.144539	0.161934	0.1539	0.145142	0.162277	0.128296	0.163933
51	0.174164	0.162315	0.177864	0.180824	0.163773	0.160606	0.15284	0.164085	0.185326	0.150528	0.164246	0.178886	0.17234	0.162582	0.16095	0.17482	0.177094	0.157722	0.137306	0.150238	0.182533	0.164474	0.201767	0.173653	0.169846	0.186806	0.174599	0.167824	0.205994	0.211494	0.166916	0.136948	0.145599	0.160324	0.207024	0.187027	0.175072	0.164749	0.181572	0.163818	0.165436	0.0955963	0.120865	0.150635	0.164787	0.158913	0.181541	0.201744	0.18103
53	0.152779	0.130692	0.155441	0.175262	0.175842	0.164879	0.146843	0.179893	0.209915	0.195839	0.168922	0.175194	0.167686	0.162788	0.168831	0.172417	0.173805	0.172966	0.160126	0.177925	0.2192	0.215935	0.200676	0.172417	0.148018	0.200996	0.186897	0.167343	0.183907	0.177597	0.173294	0.199928	0.15728	0.153206	0.160919	0.175163	0.172646	0.174942	0.165512	0.138771	0.134712	0.127693	0.146133	0.15361	0.185905	0.195343	0.199112	0.152916	0.161209
55	0.144997	0.123611	0.161255	0.202255	0.214958	0.217918	0.175949	0.209969	0.215729	0.218353	0.177963	0.144333	0.15313	0.159859	0.156853	0.154991	0.162971	0.159706	0.162376	0.200897	0.179832	0.186241	0.149422	0.167709	0.180817	0.174942	0.15493	0.148125	0.155724	0.186073	0.207825	0.211868	0.175209	0.184059	0.192383	0.170883	0.183006	0.170242	0.145142	0.12793	0.137482	0.10923	0.116653	0.125565	0.153839	0.153702	0.164276	0.120941	0.100929
57	0.151276	0.139069	0.139305	0.176102	0.189819	0.19828	0.197929	0.205727	0.204681	0.197983	0.194252	0.157707	0.159409	0.15493	0.149857	0.140144	0.132996	0.101051	0.128464	0.150322	0.162964	0.122269	0.120537	0.145821	0.131851	0.142937	0.137123	0.154396	0.168663	0.214386	0.216896	0.196037	0.209709	0.203011	0.227661	0.202049	0.192116	0.16465	0.120132	0.101128	0.101906	0.102913	0.124649	0.11557	0.126183	0.148834	0.153244	0.150444	0.148827
59	0.150581	0.149269	0.14325	0.147537	0.148361	0.173828	0.192802	0.201569	0.173988	0.165466	0.207146	0.186012	0.145096	0.129723	0.114571	0.117638	0.123505	0.10553	0.104118	0.0963516	0.0694427	0.0975647	0.148033	0.151749	0.132233	0.155464	0.216705	0.180077	0.135559	0.158562	0.171158	0.188667	0.148132	0.173325	0.174095	0.171715	0.174171	0.167587	0.110588	0.1166	0.123253	0.142036	0.167633	0.191566	0.195427	0.197212	0.167564	0.156044	0.153282
61	0.149475	0.152954	0.175858	0.188286	0.166435	0.152893	0.154106	0.176788	0.163429	0.190681	0.153435	0.179489	0.140244	0.114204	0.124268	0.123749	0.102859	0.0983887	0.114738	0.0886307	0.0879059	0.126381	0.139725	0.133469	0.126442	0.115555	0.130035	0.124939	0.11277	0.135925	0.126396	0.167892	0.155861	0.158607	0.123711	0.129997	0.128731	0.141205	0.117172	0.113503	0.129623	0.156029	0.18663	0.210571	0.229797	0.244019	0.20163	0.169159	0.167068
63	0.162651	0.173233	0.185188	0.193962	0.163452	0.129028	0.121712	0.134102	0.15538	0.158615	0.149048	0.123451	0.121994	0.110794	0.121735	0.14167	0.140388	0.0810623	0.0546799	0.0529709	0.0889816	0.134819	0.106247	0.0936508	0.110077	0.105133	0.105141	0.146652	0.137756	0.11216	0.119553	0.128326	0.147766	0.155289	0.173103	0.173454	0.152122	0.147644	0.155388	0.141502	0.131279	0.161041	0.192993	0.219276	0.231934	0.233864	0.21273	0.171188	0.145256
65	0.159126	0.175858	0.203163	0.20137	0.150848	0.118721	0.124855	0.1101	0.145744	0.165215	0.155182	0.139618	0.121651	0.134705	0.136093	0.137947	0.119514	0.0890579	0.107941	0.096344	0.10865	0.109314	0.122261	0.130417	0.135117	0.13298	0.150993	0.172447	0.162117	0.161247	0.149399	0.149765	0.171715	0.160233	0.163246	0.163864	0.158432	0.145363	0.160683	0.173431	0.163651	0.167847	0.178856	0.17437	0.182884	0.20137	0.18026	0.164429	0.160301
67	0.160957	0.19165	0.201607	0.194969	0.175873	0.179314	0.175774	0.106491	0.14814	0.175537	0.15799	0.145699	0.162003	0.130142	0.143021	0.122627	0.126778	0.131721	0.163521	0.177055	0.140945	0.127686	0.153877	0.140793	0.137703	0.138046	0.160698	0.164734	0.177498	0.173317	0.15976	0.135384	0.137428	0.142624	0.137955	0.151337	0.158699	0.169144	0.191002	0.216652	0.207649	0.196854	0.211685	0.176361	0.175758	0.194397	0.176765	0.163475	0.153885
69	0.163902	0.182945	0.187874	0.182167	0.199287	0.19503	0.179886	0.15316	0.124542	0.136345	0.138054	0.155739	0.166122	0.186073	0.182938	0.176712	0.157471	0.15136	0.190811	0.203552	0.162003	0.135643	0.130264	0.134537	0.151024	0.160034	0.165123	0.170586	0.184448	0.186005	0.161781	0.153008	0.14743	0.142281	0.142159	0.162399	0.177757	0.188316	0.203194	0.211418	0.223312	0.243492	0.238518	0.20488	0.19783	0.223679	0.214394	0.196159	0.185646
71	0.175766	0.175468	0.171066	0.187538	0.178955	0.174965	0.177559	0.167503	0.146011	0.148323	0.16069	0.167259	0.178886	0.190224	0.174194	0.158066	0.171402	0.160828	0.14444	0.146248	0.147346	0.121094	0.122772	0.139221	0.168579	0.191101	0.190079	0.1744	0.180519	0.186668	0.175095	0.17112	0.181137	0.179031	0.178139	0.182739	0.190208	0.193932	0.188263	0.199783	0.224777	0.218483	0.218399	0.231483	0.234787	0.212601	0.211021	0.20266	0.197853
73	0.154816	0.141884	0.147575	0.158737	0.155609	0.139755	0.141388	0.137627	0.134285	0.147842	0.155334	0.158447	0.152191	0.15062	0.144272	0.155167	0.159714	0.165688	0.16671	0.145782	0.130859	0.131927	0.150421	0.146004	0.157394	0.176544	0.176544	0.170197	0.166969	0.173775	0.164726	0.155937	0.160355	0.165382	0.167229	0.16584	0.163513	0.165482	0.174065	0.198242	0.195648	0.19603	0.188011	0.206963	0.214874	0.208885	0.205521	0.19426	0.183167
75	0.149796	0.150139	0.150673	0.149239	0.128944	0.130569	0.143623	0.13665	0.134033	0.14241	0.155174	0.160194	0.157341	0.16304	0.171211	0.17588	0.175537	0.174919	0.180756	0.177231	0.169144	0.158035	0.152428	0.171272	0.196709	0.20533	0.212753	0.218185	0.212196	0.203224	0.18206	0.163681	0.15432	0.158051	0.151825	0.141922	0.14959	0.173645	0.180122	0.182083	0.190651	0.174988	0.162544	0.176468	0.187546	0.19722	0.196754	0.196419	0.191193
77	0.161339	0.16626	0.158485	0.138161	0.126709	0.132286	0.139648	0.13855	0.141411	0.144402	0.147499	0.15657	0.165382	0.178497	0.194855	0.195984	0.196953	0.201157	0.204437	0.201111	0.185997	0.16983	0.178131	0.198944	0.203461	0.195442	0.197472	0.20153	0.201393	0.201714	0.195915	0.180901	0.167793	0.173836	0.173355	0.185349	0.202339	0.199188	0.202835	0.190742	0.191093	0.186302	0.183426	0.186798	0.188896	0.192513	0.188446	0.190964	0.205727
79	0.175613	0.174629	0.17205	0.174988	0.164696	0.154961	0.149681	0.145462	0.144661	0.148964	0.158554	0.166611	0.172012	0.172638	0.179756	0.189079	0.195709	0.203186	0.208923	0.214249	0.212753	0.206314	0.198959	0.191498	0.186874	0.183365	0.179176	0.182777	0.195702	0.206459	0.206444	0.194672	0.186424	0.189751	0.189911	0.17572	0.181953	0.185875	0.187813	0.180489	0.170479	0.178299	0.178711	0.169128	0.170174	0.177376	0.181648	0.188499	0.194725
81	0.172119	0.173882	0.17617	0.176079	0.175095	0.170029	0.158401	0.151085	0.166061	0.169617	0.175056	0.181786	0.183861	0.185982	0.192329	0.201096	0.207817	0.209953	0.209274	0.208275	0.208504	0.210403	0.208008	0.201378	0.201828	0.200195	0.197784	0.198372	0.201828	0.203217	0.206932	0.208862	0.20826	0.204796	0.192032	0.182434	0.175652	0.171883	0.172188	0.17717	0.175041	0.165779	0.164124	0.175415	0.180824	0.178162	0.177544	0.175079	0.172089
83	0.178467	0.18486	0.188141	0.188019	0.18412	0.175667	0.163551	0.181648	0.185745	0.187126	0.186943	0.185791	0.192551	0.199226	0.203758	0.205872	0.207672	0.207237	0.207603	0.209892	0.211823	0.21331	0.214714	0.214241	0.21315	0.211815	0.210762	0.21003	0.210297	0.213249	0.214745	0.214462	0.210869	0.202858	0.194168	0.18679	0.182625	0.190575	0.198303	0.191483	0.192627	0.190773	0.188225	0.190598	0.202133	0.200188	0.198898	0.196678	0.192863
85	0.18502	0.183456	0.181908	0.181221	0.181892	0.184029	0.190491	0.195328	0.197464	0.199356	0.200035	0.197678	0.196167	0.19899	0.203857	0.207169	0.20829	0.209641	0.212585	0.213516	0.214478	0.215866	0.216576	0.21701	0.217369	0.217293	0.217674	0.219543	0.21949	0.218224	0.217522	0.216362	0.215347	0.214828	0.214554	0.213966	0.21209	0.208351	0.201073	0.195465	0.19249	0.192131	0.190109	0.189903	0.190598	0.191071	0.191849	0.191475	0.190956
87	0.205055	0.206375	0.208458	0.211319	0.214813	0.217072	0.218254	0.219849	0.220612	0.21994	0.219299	0.218285	0.217484	0.217537	0.218887	0.220909	0.221962	0.223595	0.225052	0.22567	0.225456	0.225441	0.223701	0.222343	0.220535	0.219559	0.218582	0.218475	0.218544	0.218925	0.219696	0.221481	0.222694	0.223442	0.223862	0.224426	0.22422	0.223877	0.224281	0.224319	0.224121	0.223831	0.222427	0.220337	0.217354	0.213654	0.209305	0.207031	0.205078
89	0.215576	0.215576	0.215576	0.215576	0.215576	0.215576	0.215576	0.215576	0.215576	0.215576	0.215576	0.215576	0.215576	0.215576	0.215576	0.215576	0.215576	0.215576	0.215576	0.215576	0.215576	0.215576	0.215576	0.215576	0.215576	0.215576	0.215576	0.215576	0.215576	0.215576	0.215576	0.215576	0.215576	0.215576	0.215576	0.215576	0.215576	0.215576	0.215576	0.215576	0.215576	0.215576	0.215576	0.215576	0.215576	0.215576	0.215576	0.215576	0.215576
[truncated: 95 more columns]
